# Supplementary material
Source: PubMed Central journal article supplement (PMC6934042)
Supplement: NIHMS1064165-supplement-SI.pdf [file NIHMS1064165-supplement-SI.pdf]

# Supporting Information

## **GPU-Accelerated Implementation of Continuous Constant pH Molecular Dynamics in Amber: $pK_a$ Predictions with Single-pH Titration Simulations**

Robert C. Harris and Jana Shen\*

*Department of Pharmaceutical Sciences, University of Maryland School of Pharmacy,  
Baltimore, MD 21201.*

E-mail: [jana.shen@rx.umaryland.edu](mailto:jana.shen@rx.umaryland.edu)



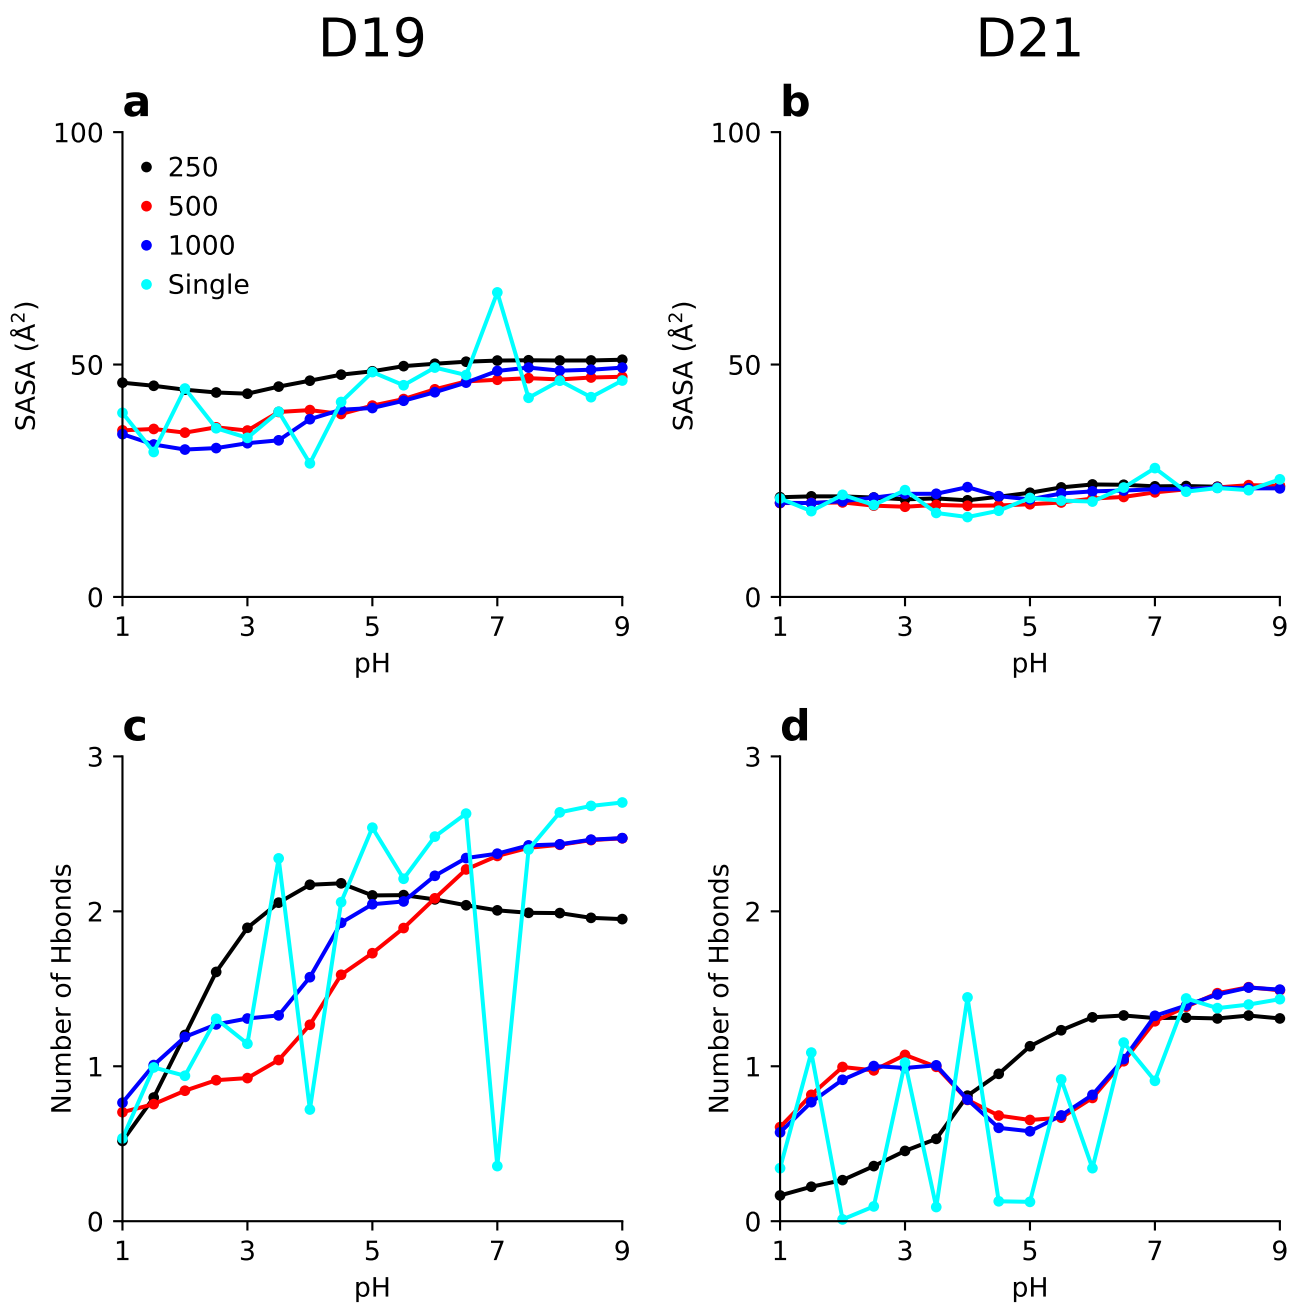

Figure S1: The solvent-accessible surface area (SASA) and number of hydrogen bonds as functions of pH for Asp 19 and Asp 21 in SNase from the replica-exchange simulations with 250 steps between replica exchange attempts, 500 steps between attempts, 1000 steps between attempts, and from the single-pH simulations.

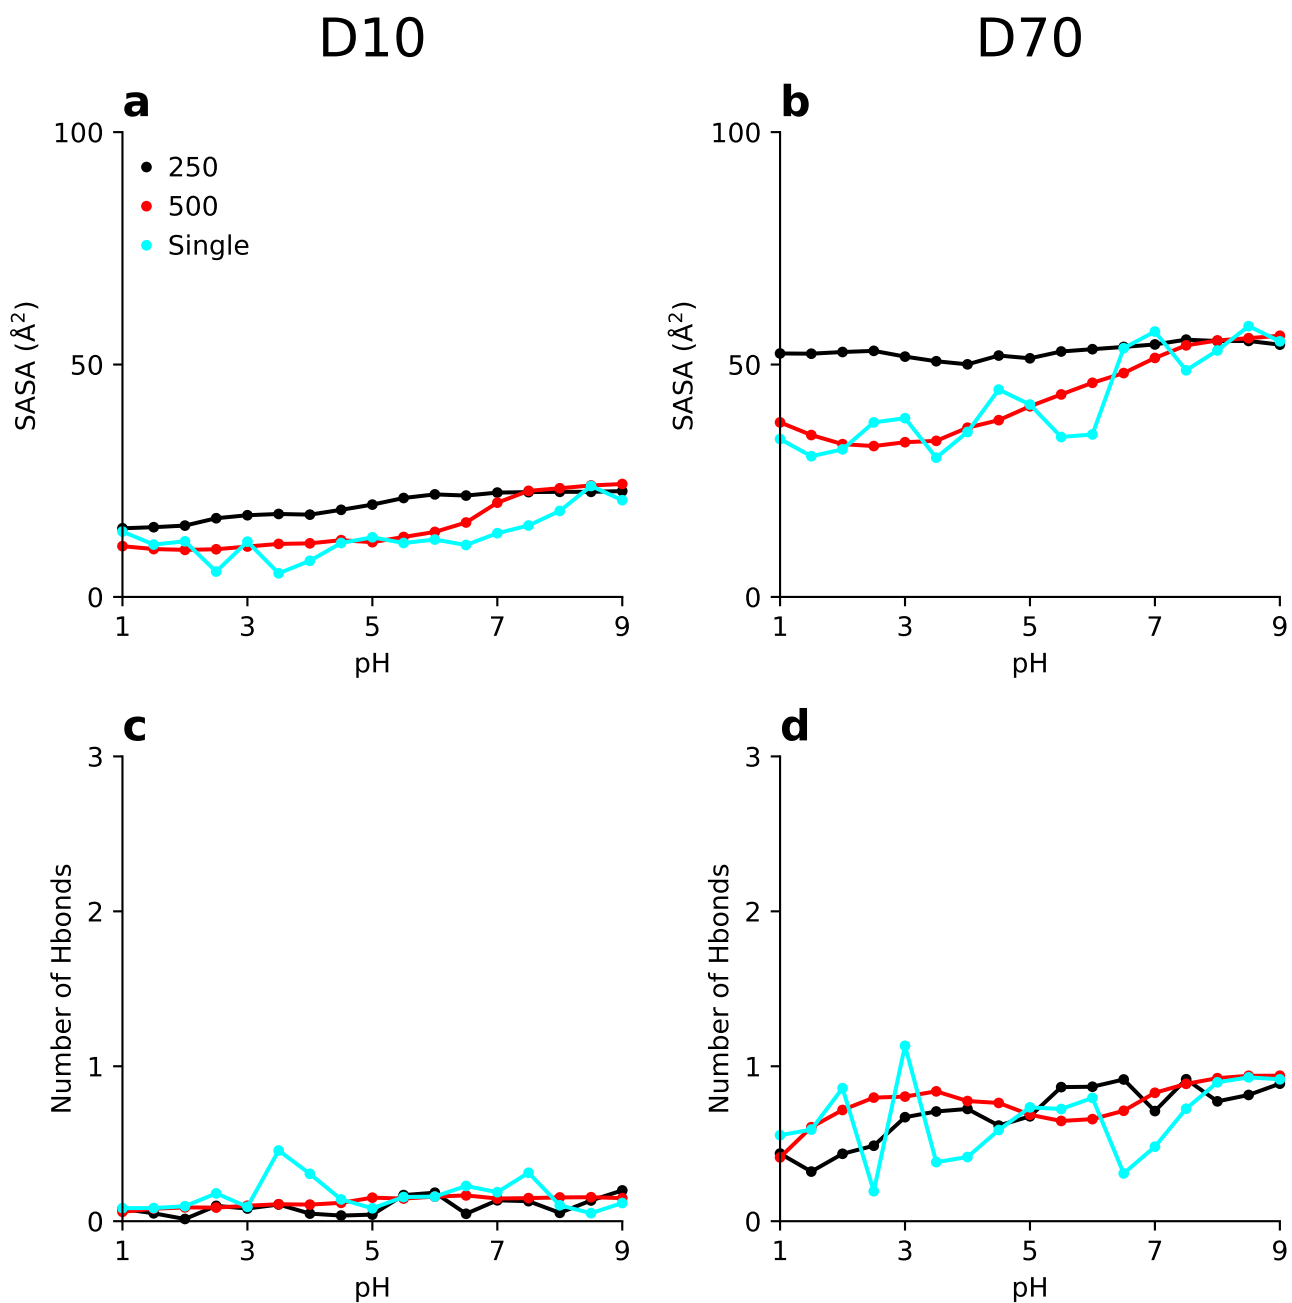

Figure S2: The solvent-accessible surface area (SASA) and number of hydrogen bonds as functions of pH for Asp 10 and Asp 70 in RNase H from the replica-exchange simulations with 250 steps between replica exchange attempts, 500 steps between attempts, 1000 steps between attempts, and from the single-pH simulations.

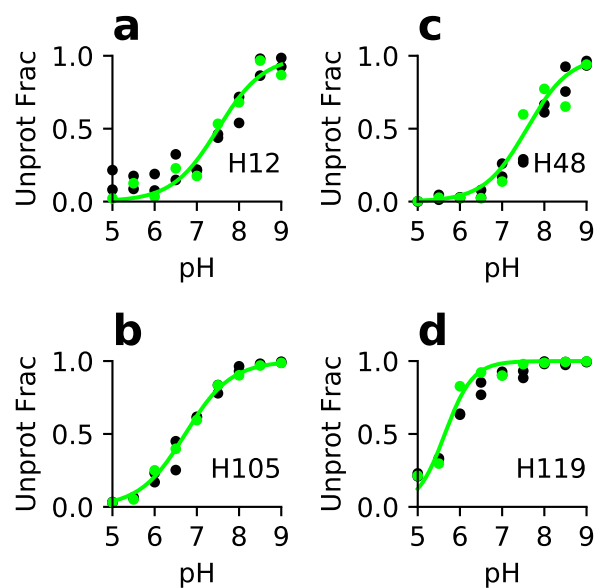

Figure S3: **The data underlying the bootstrap error analysis for the His ((a) H12 (b) H105 (c) H48 (d) H119) residues in RNase A.** Three single-pH simulations were run at pH = 5, 6, 7, 8, and 9. The first data set and fits to the Henderson-Hasselbalch equation are in green.

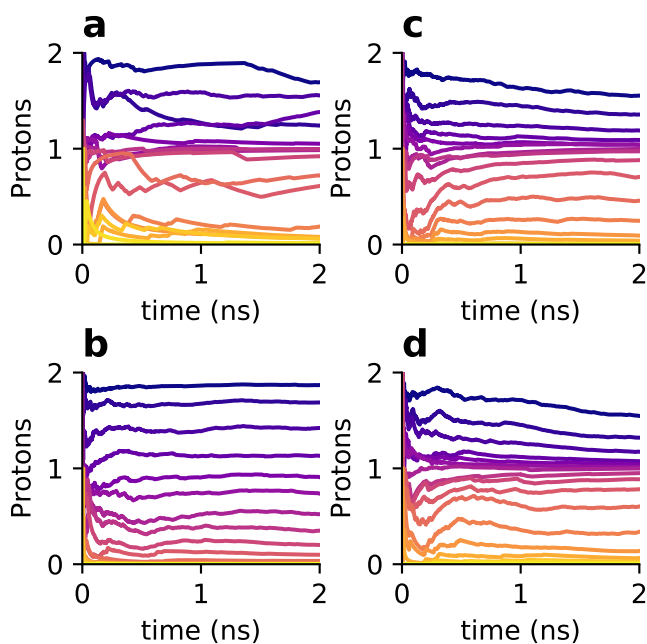

Figure S4: **Total number of protons on Asp19 and Asp21 in SNase as a function of time.** (a) Single-pH simulations. Replica-exchange simulations with swap attempt rates of (b)  $2 \text{ ps}^{-1}$  and (c)  $1 \text{ ps}^{-1}$ .

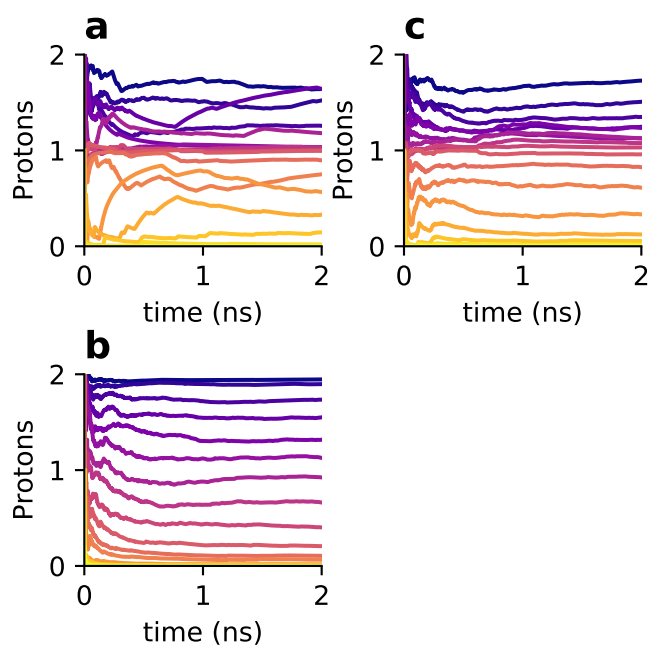

Figure S5: **Total number of protons on Asp10 and Asp70 in RNaseH as a function of time.** (a) Single-pH simulations. Replica-exchange simulations with swap attempt rates of (b)  $2 \text{ ps}^{-1}$  and (c)  $1 \text{ ps}^{-1}$ .

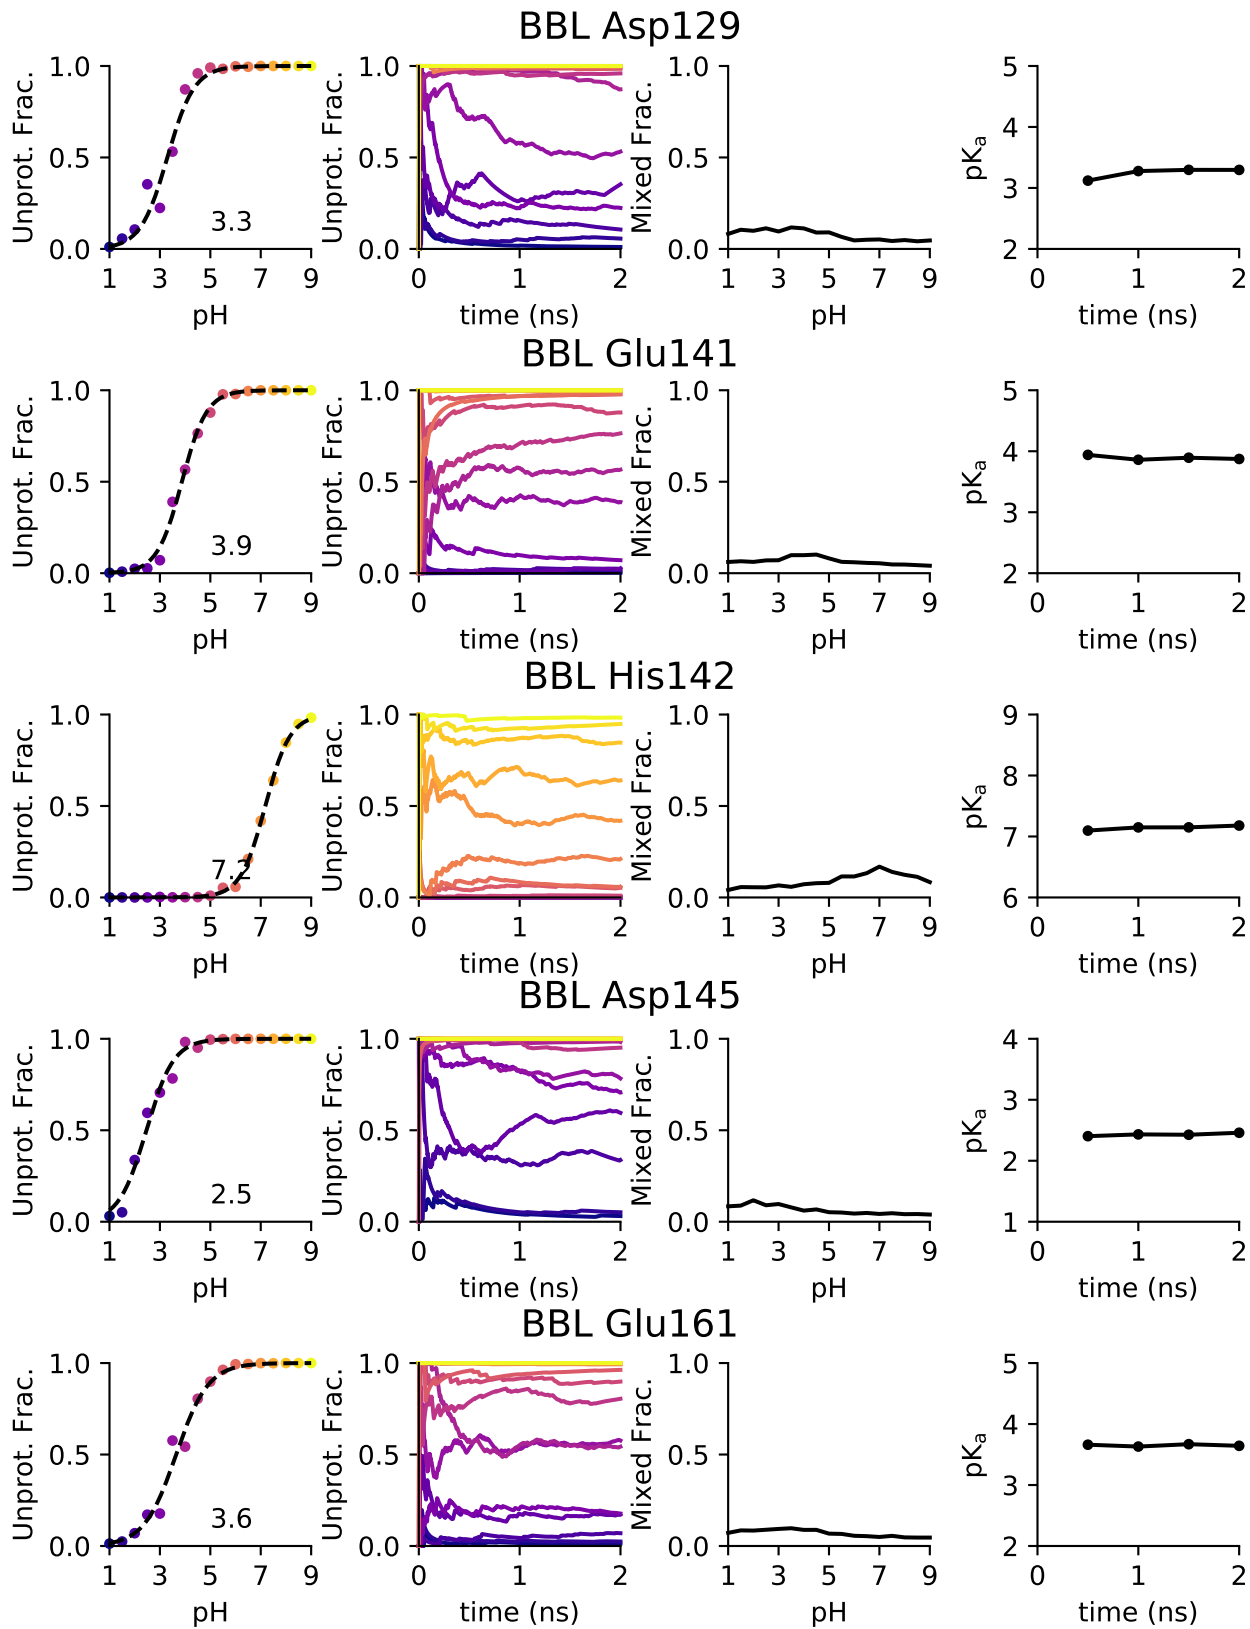

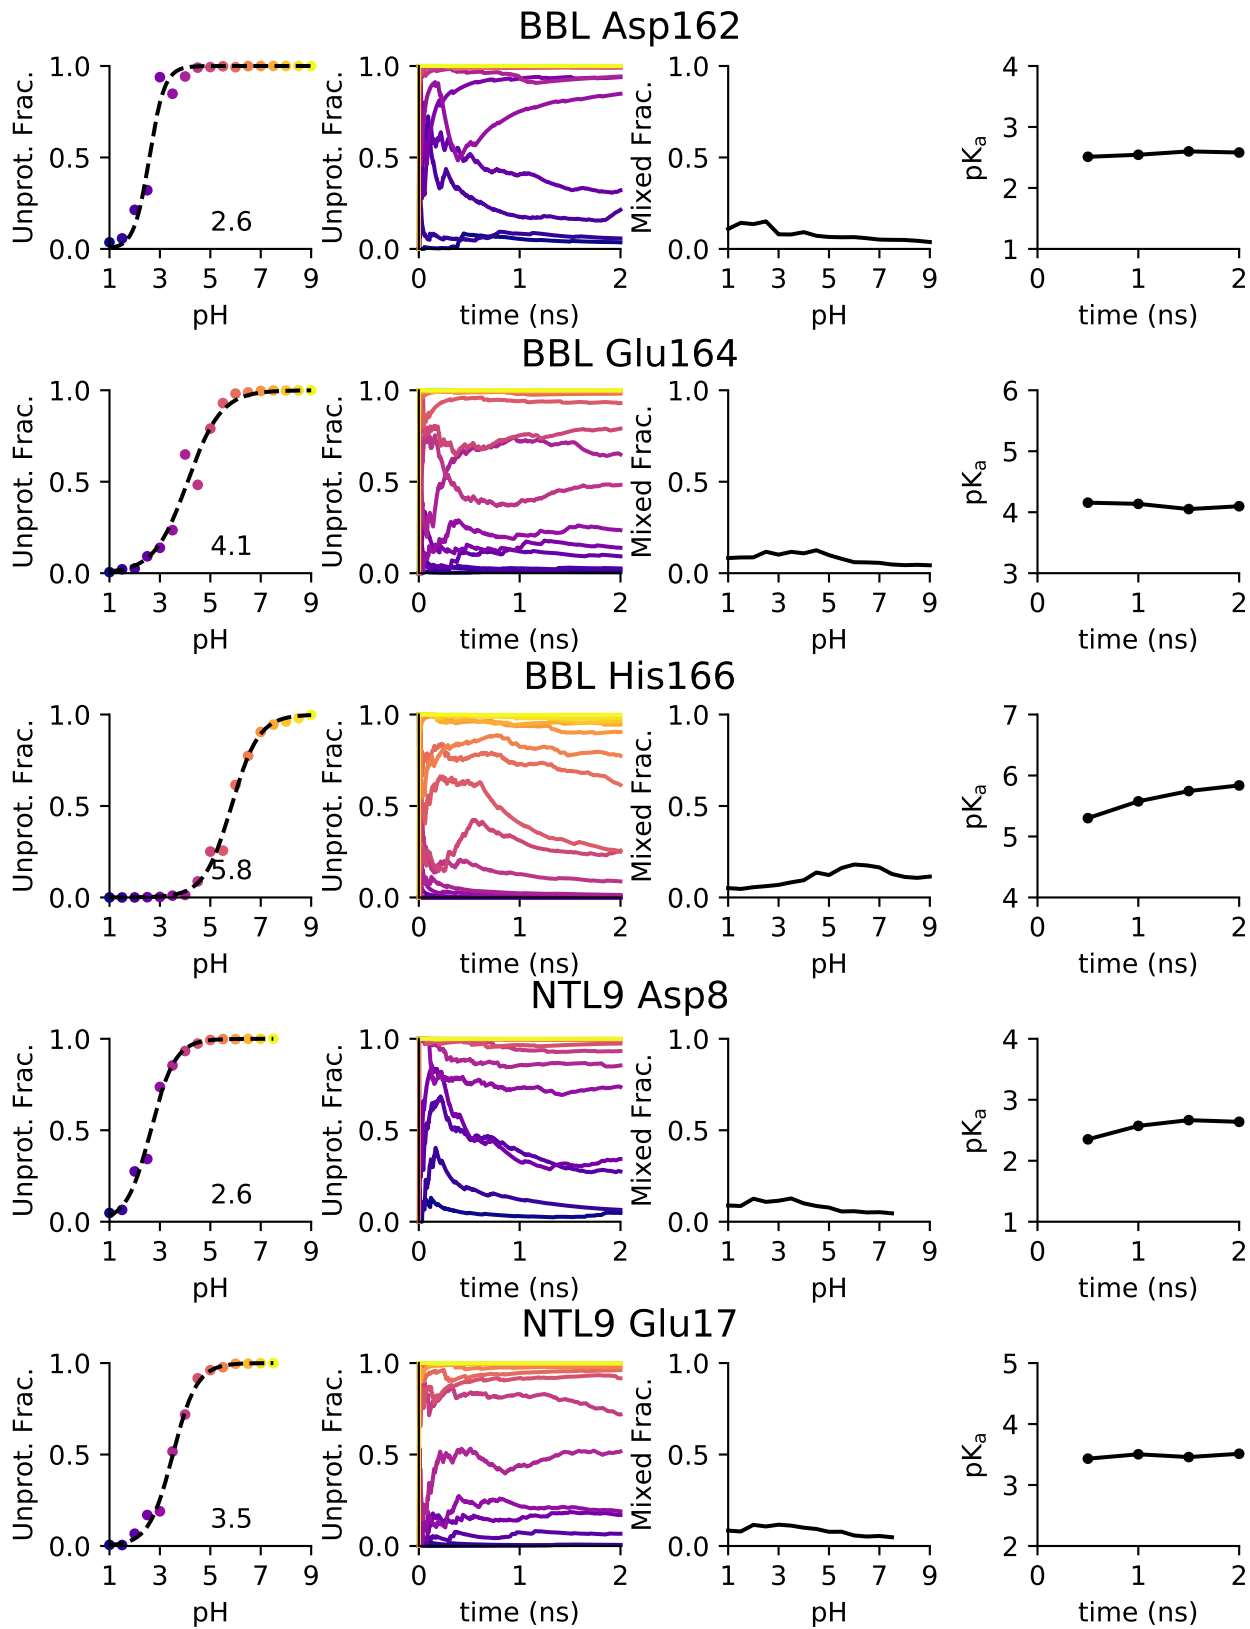



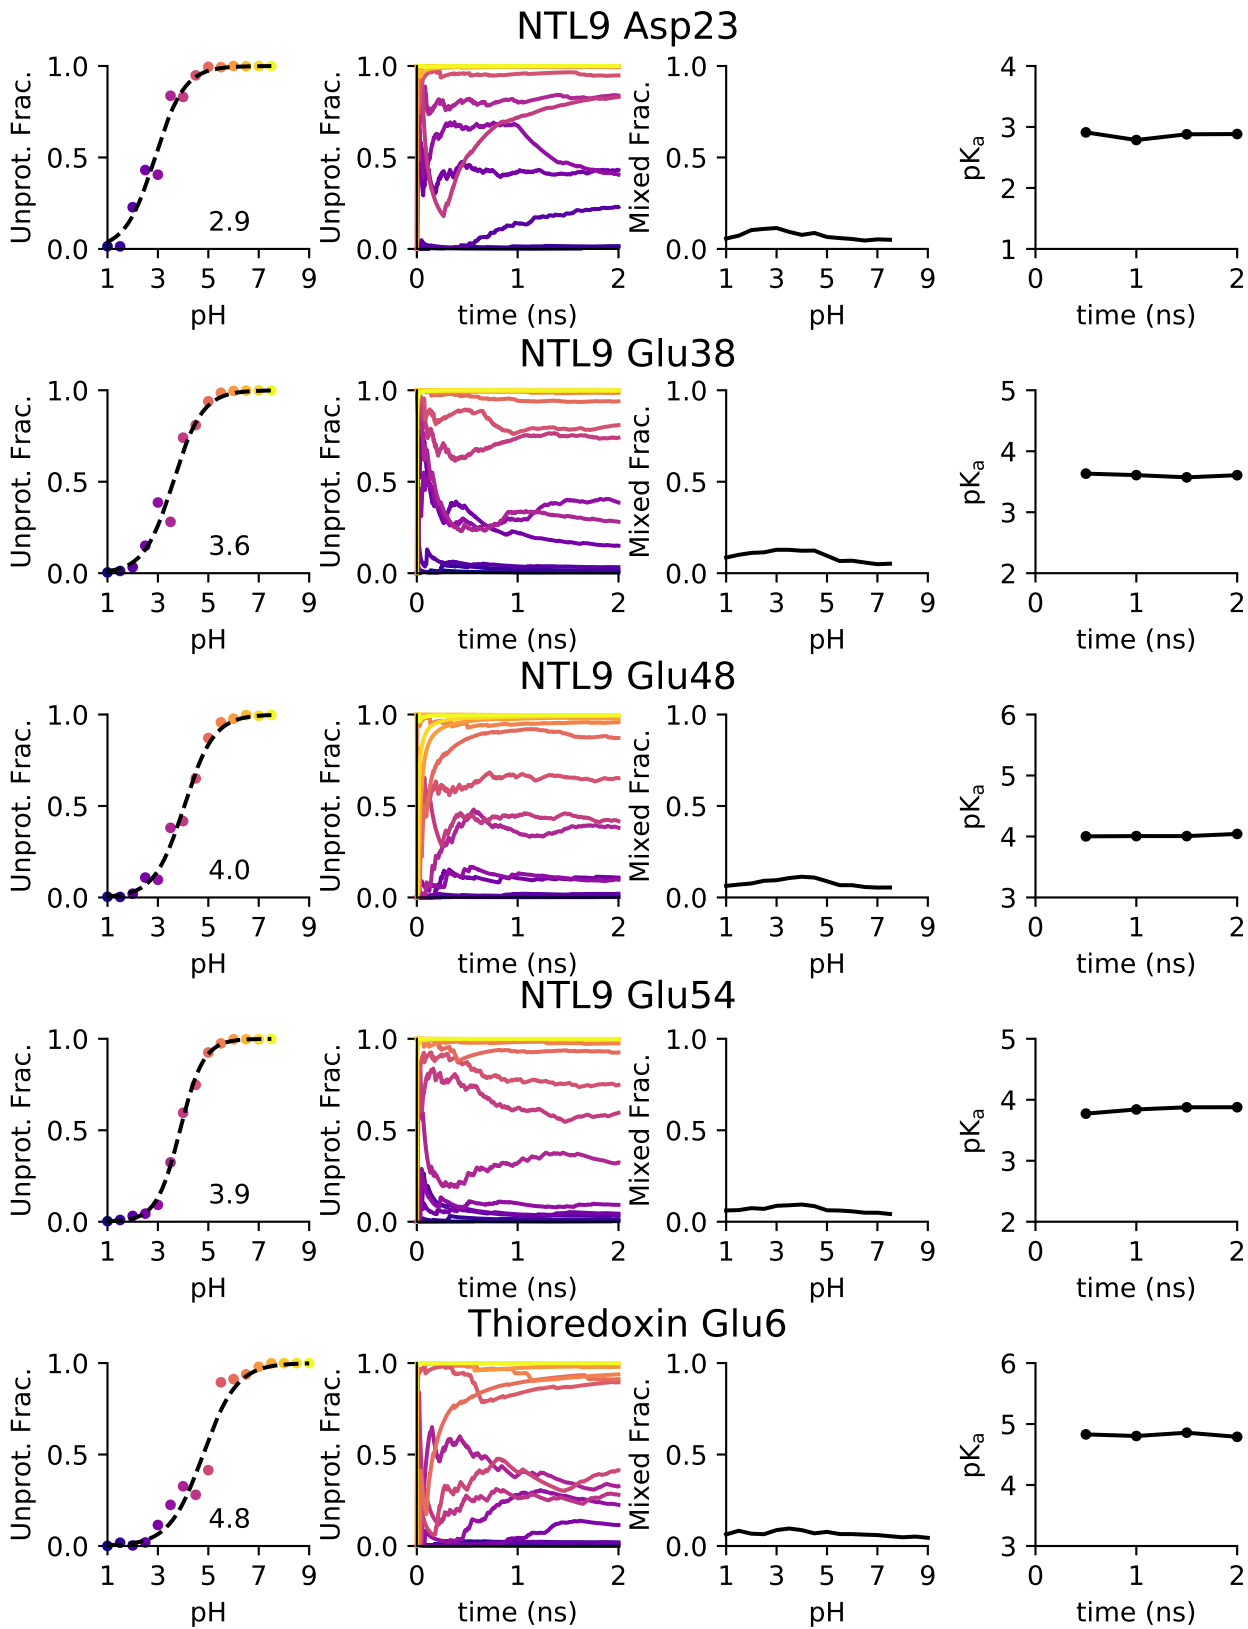

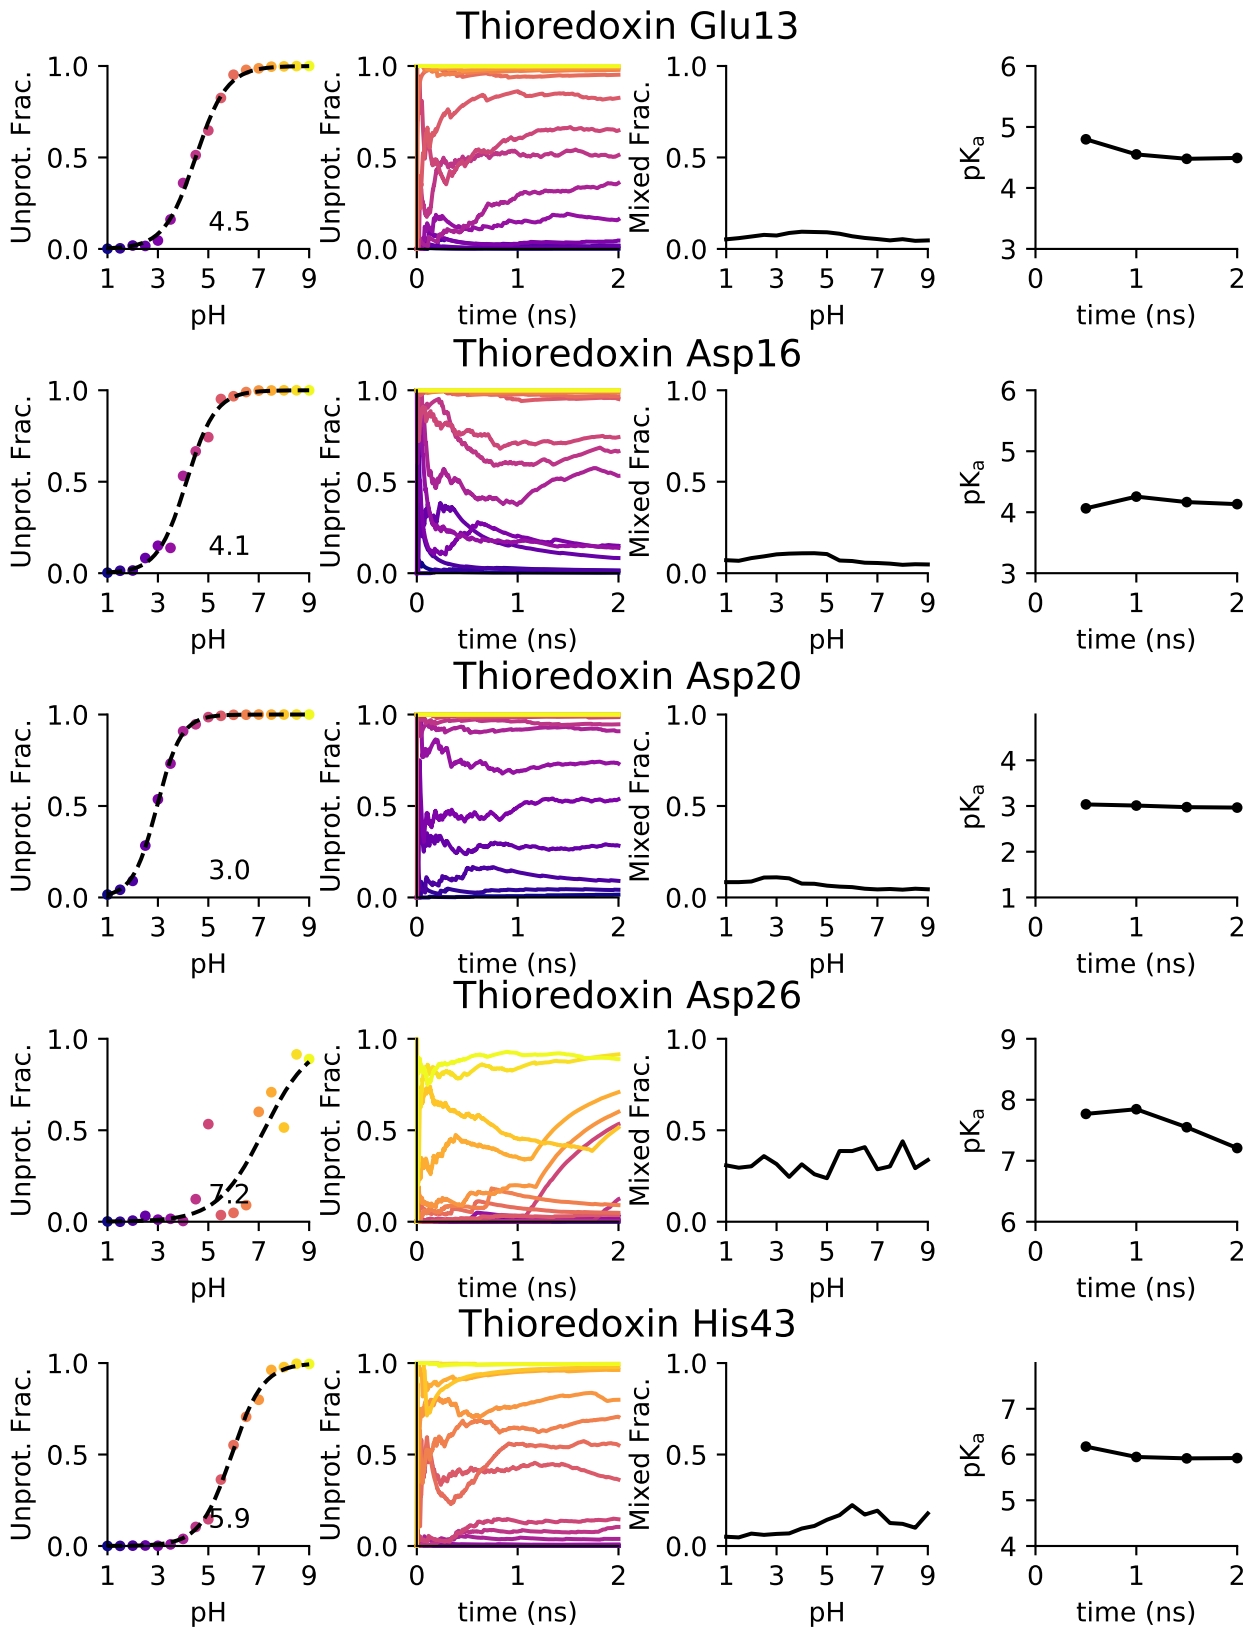

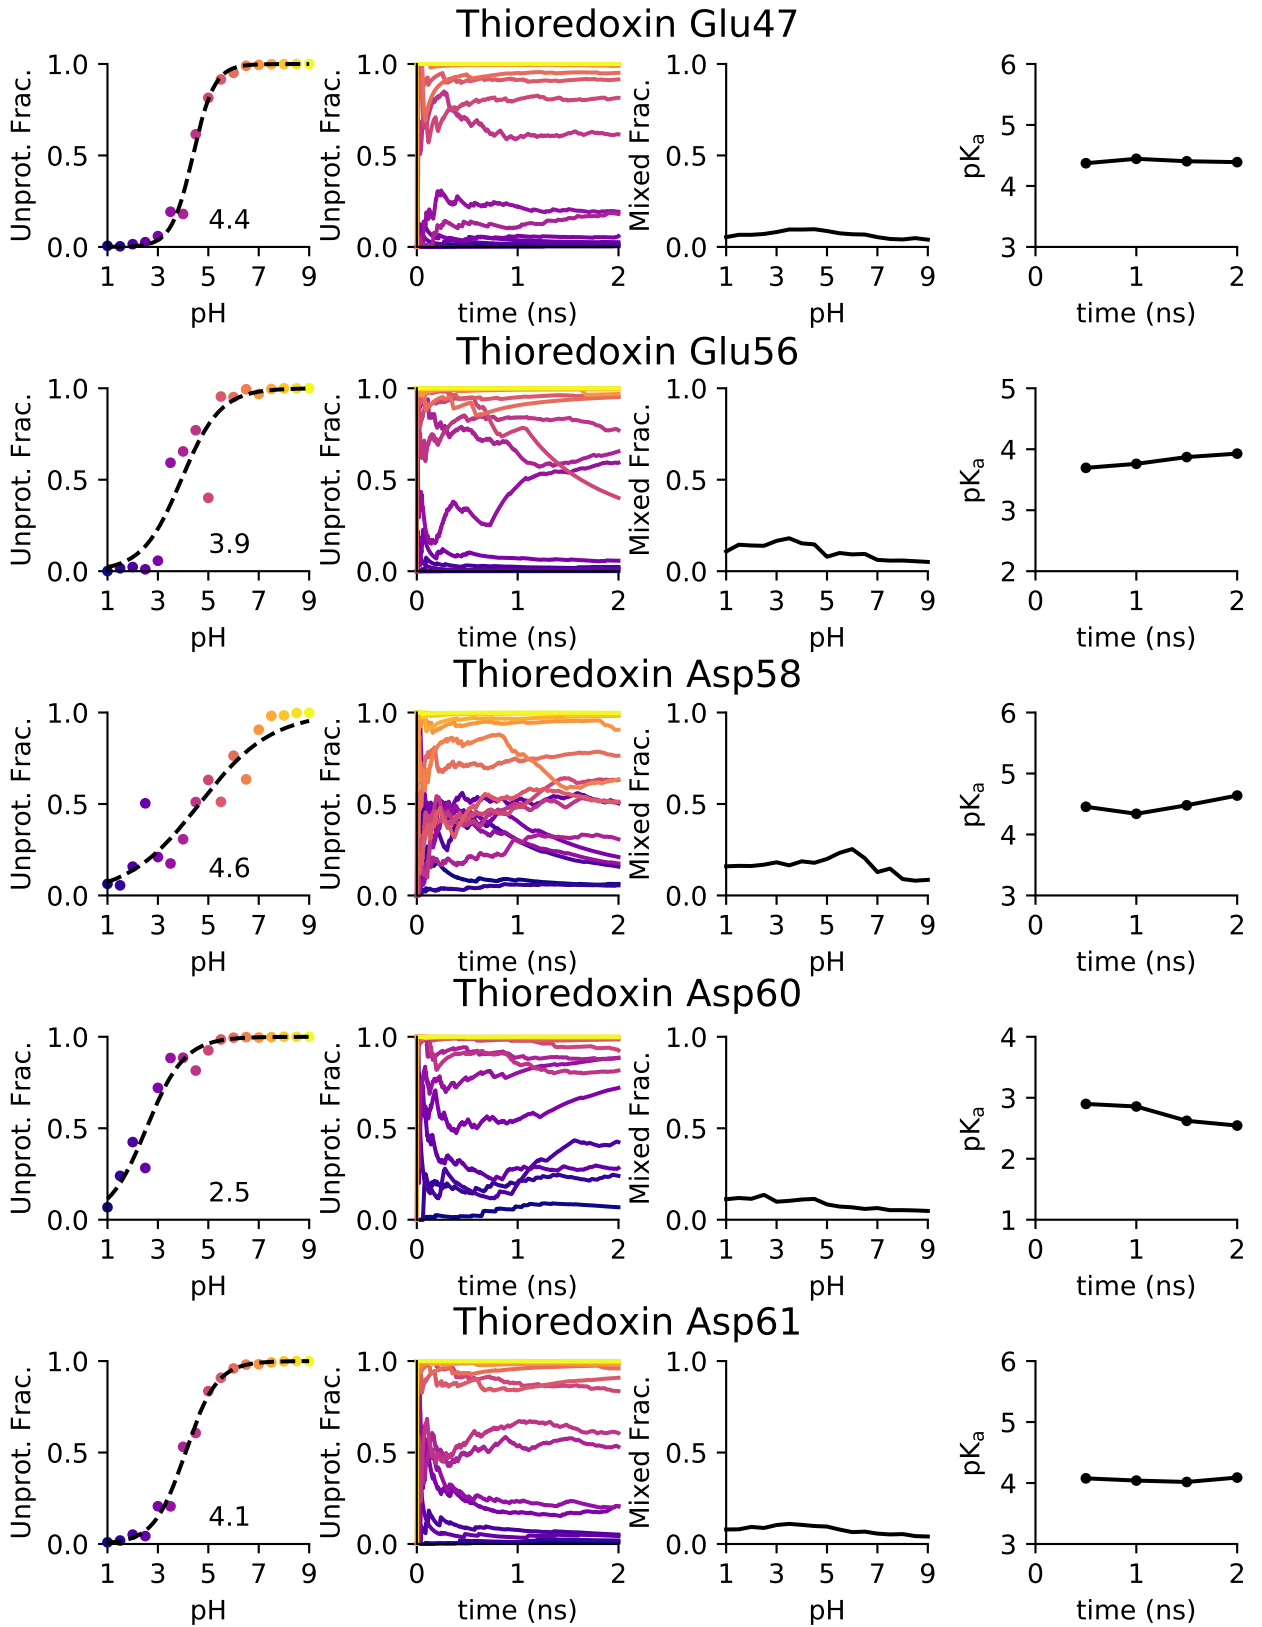

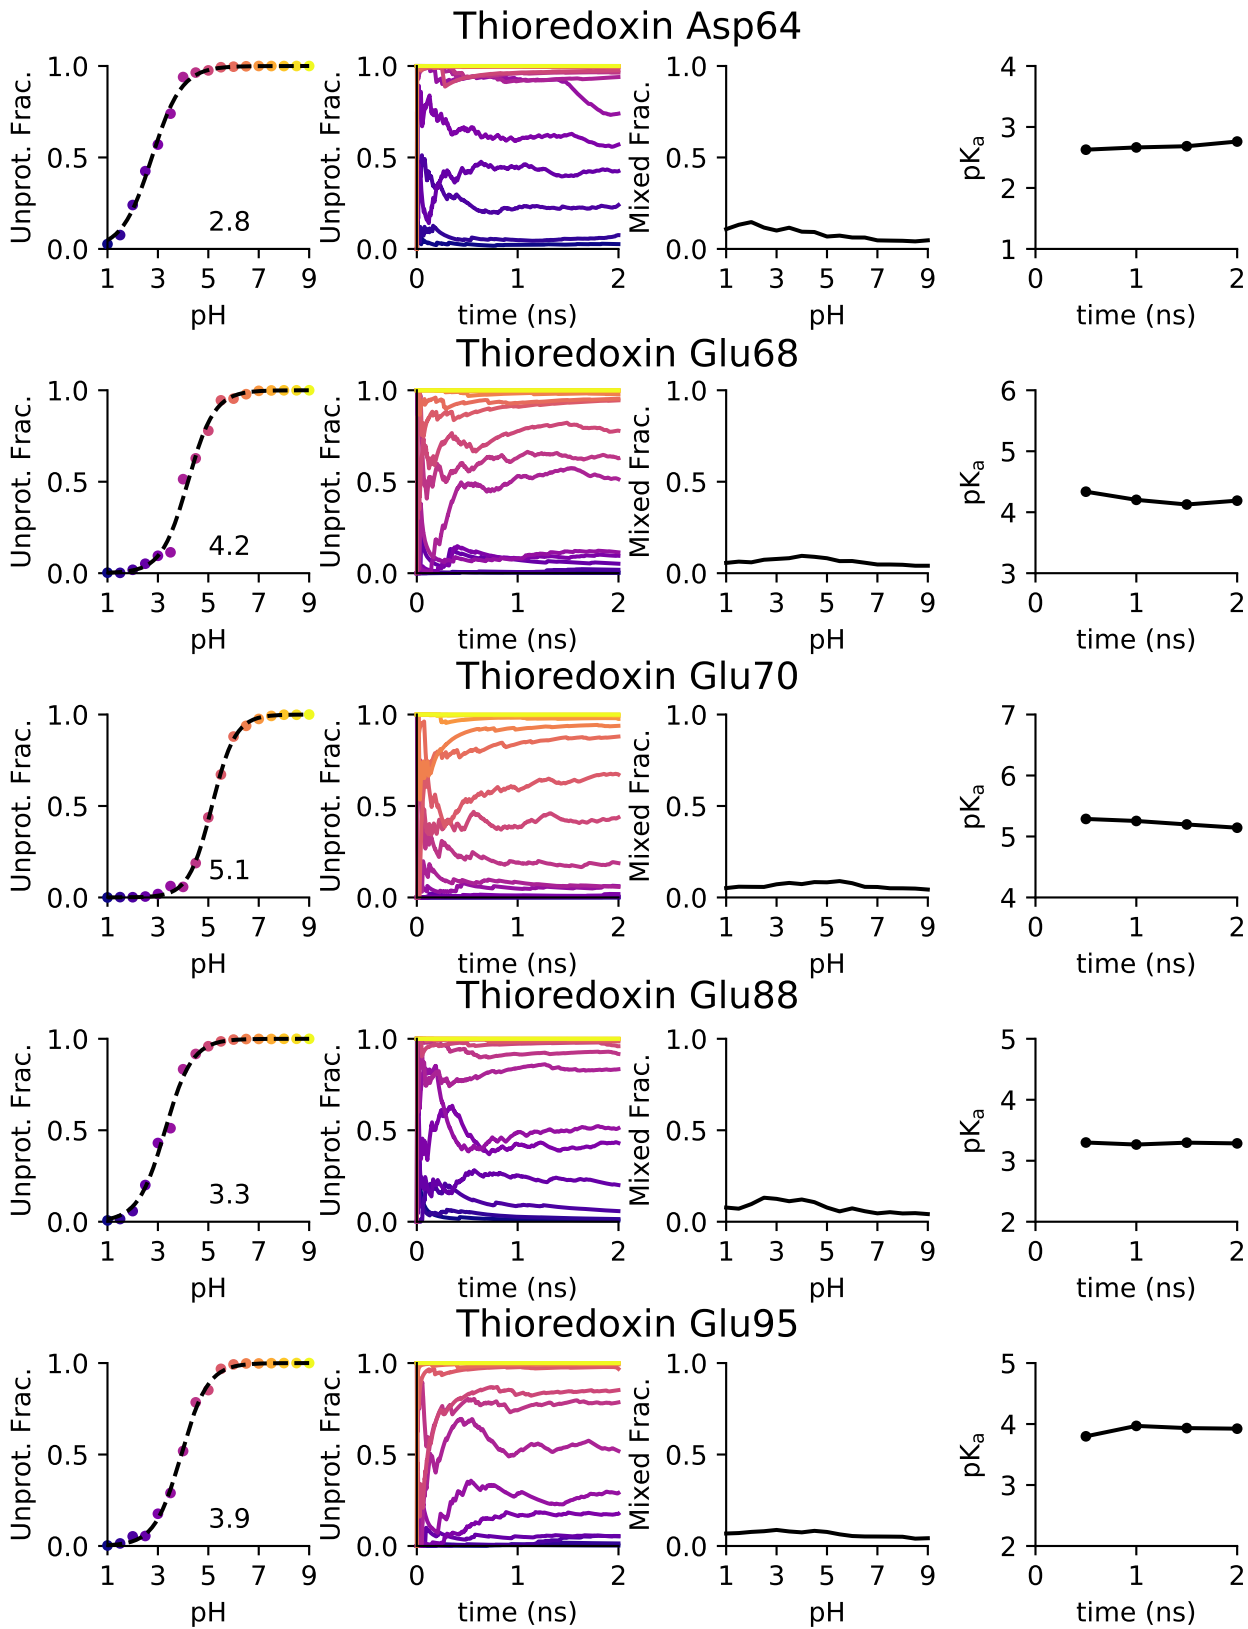

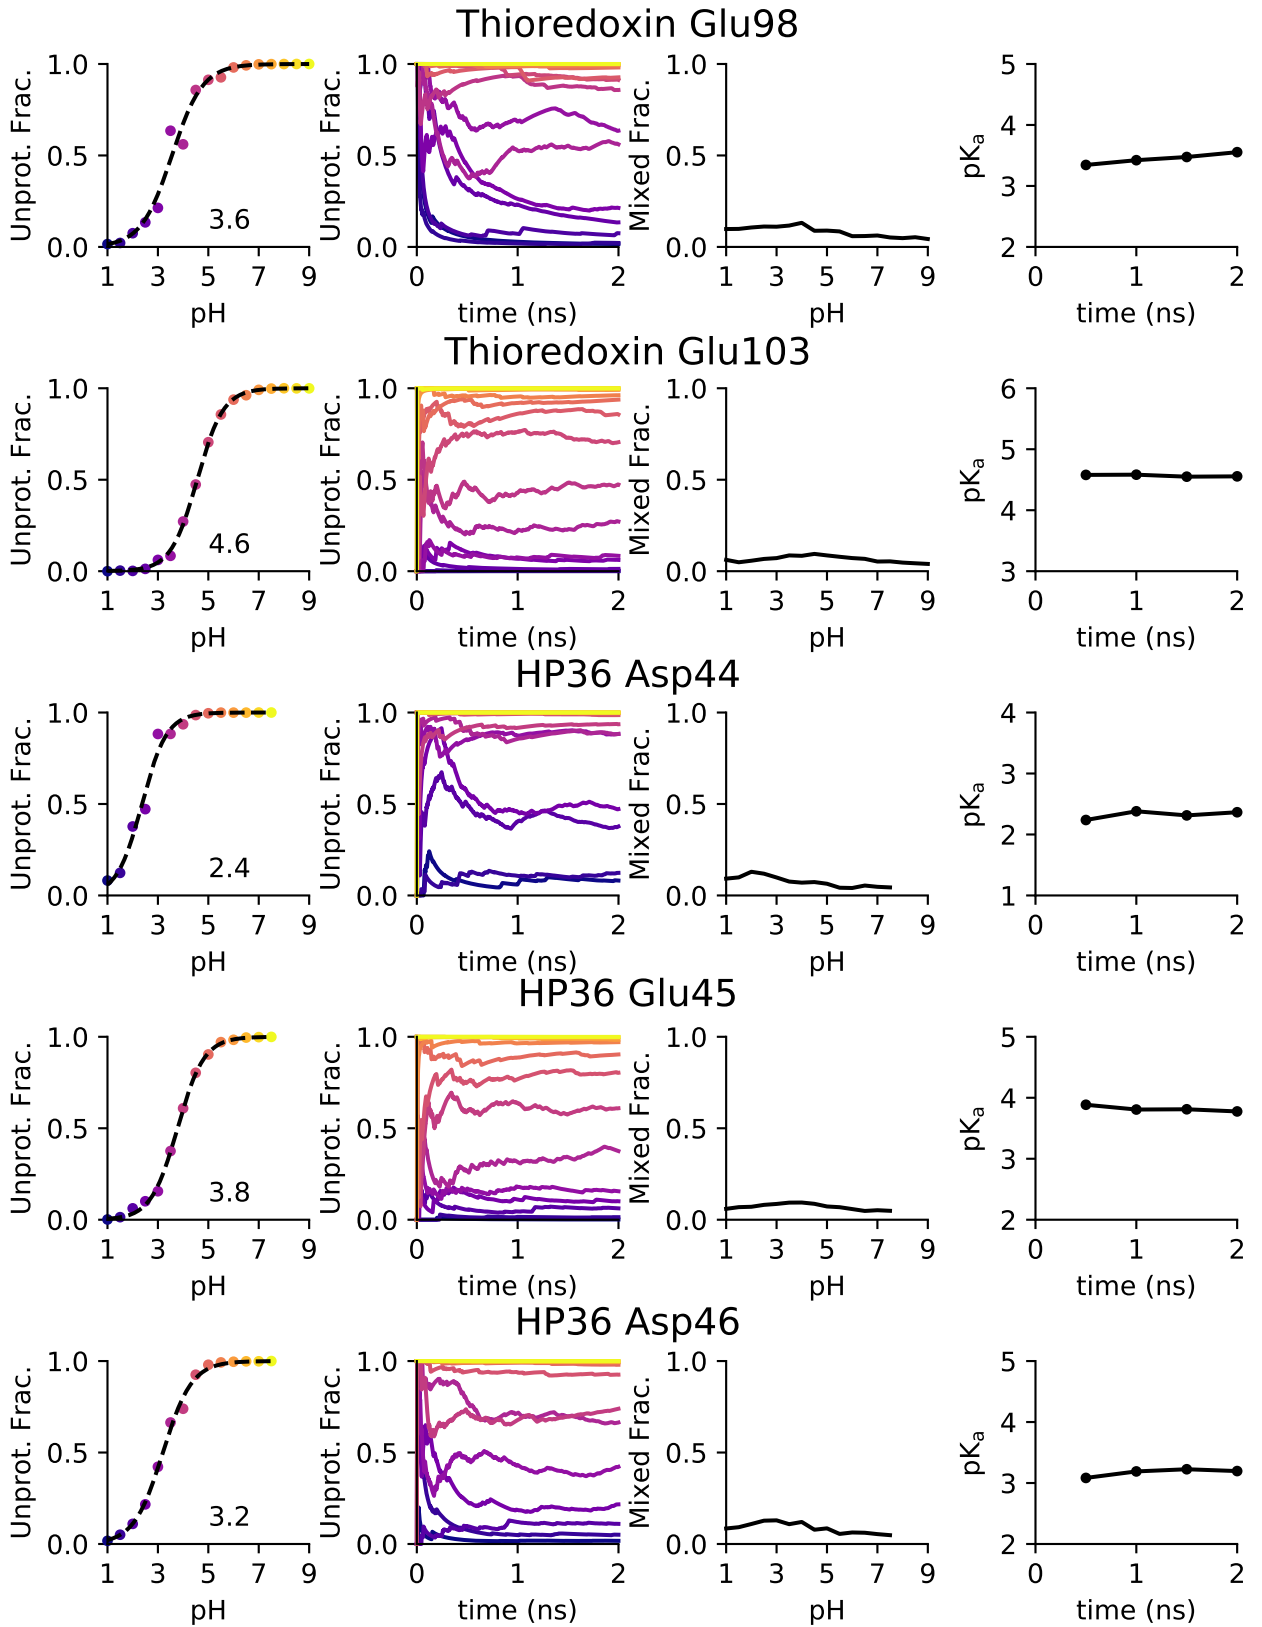

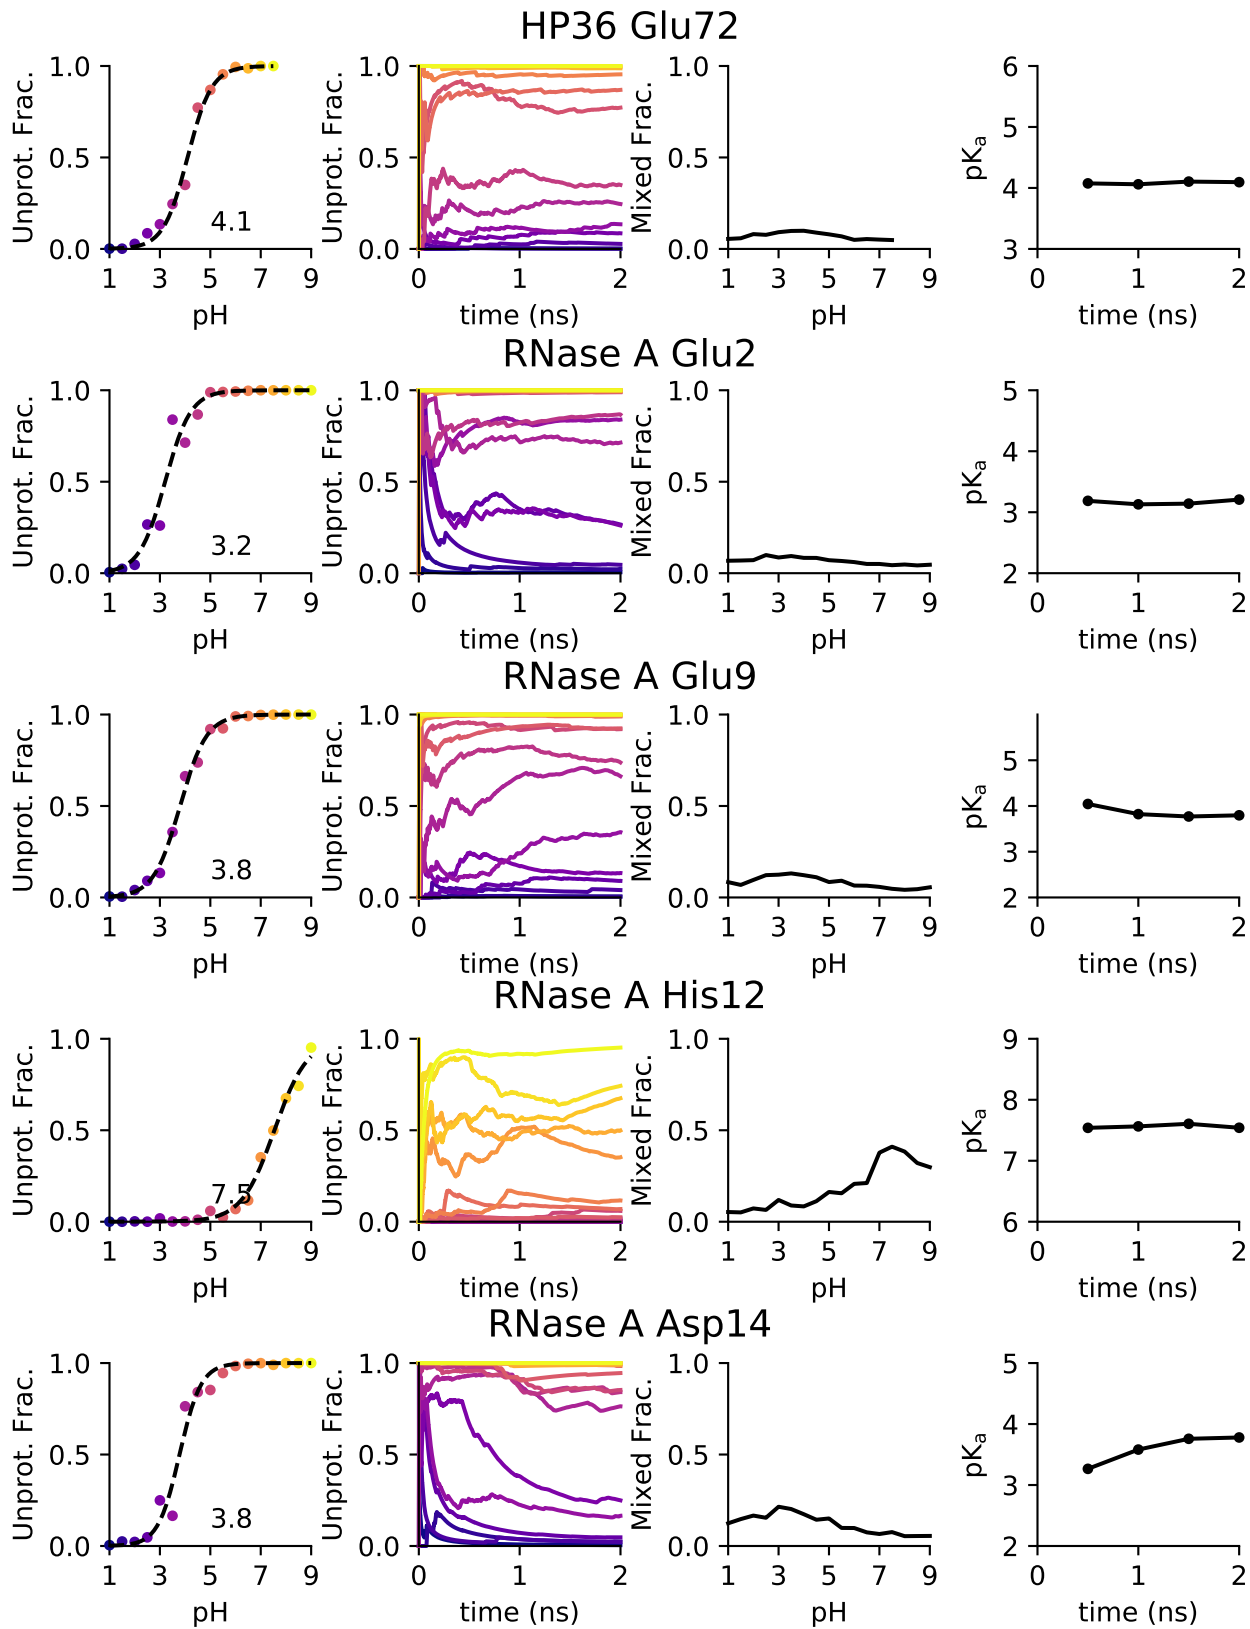

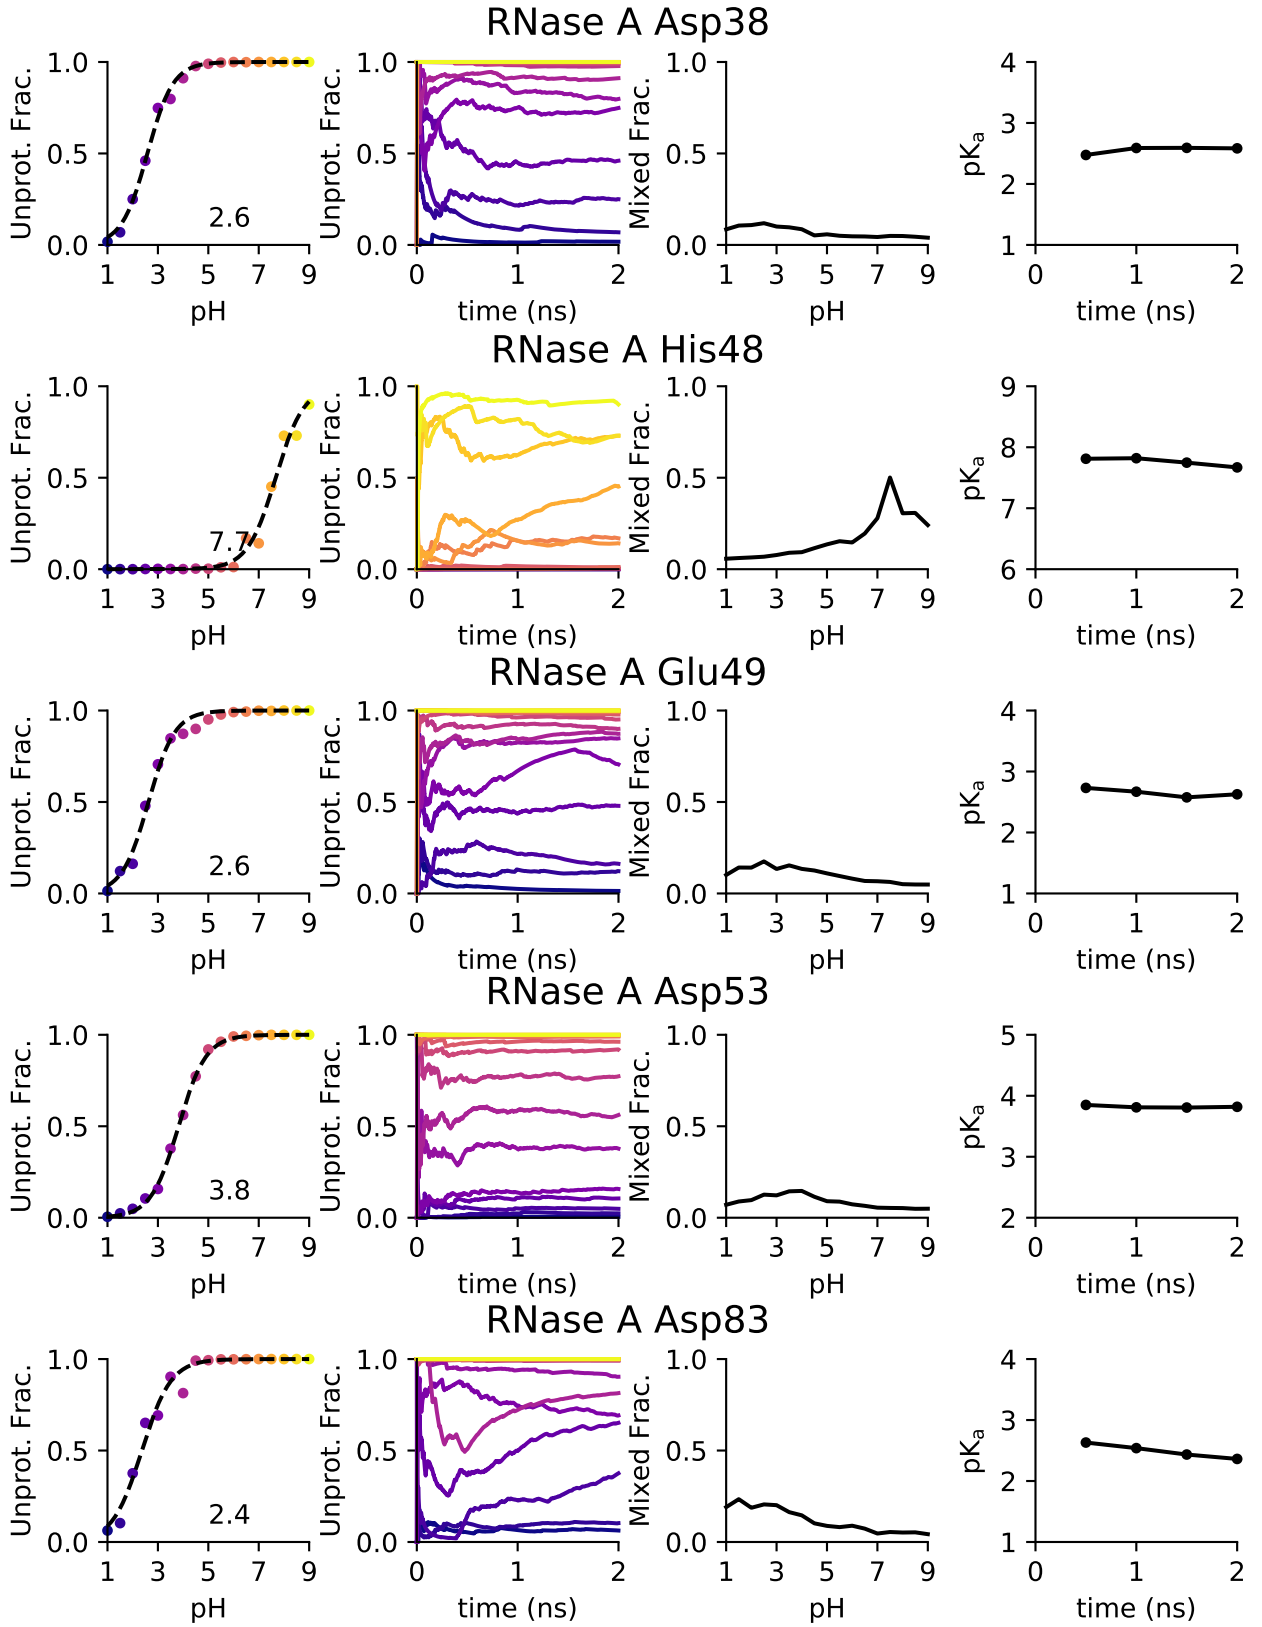

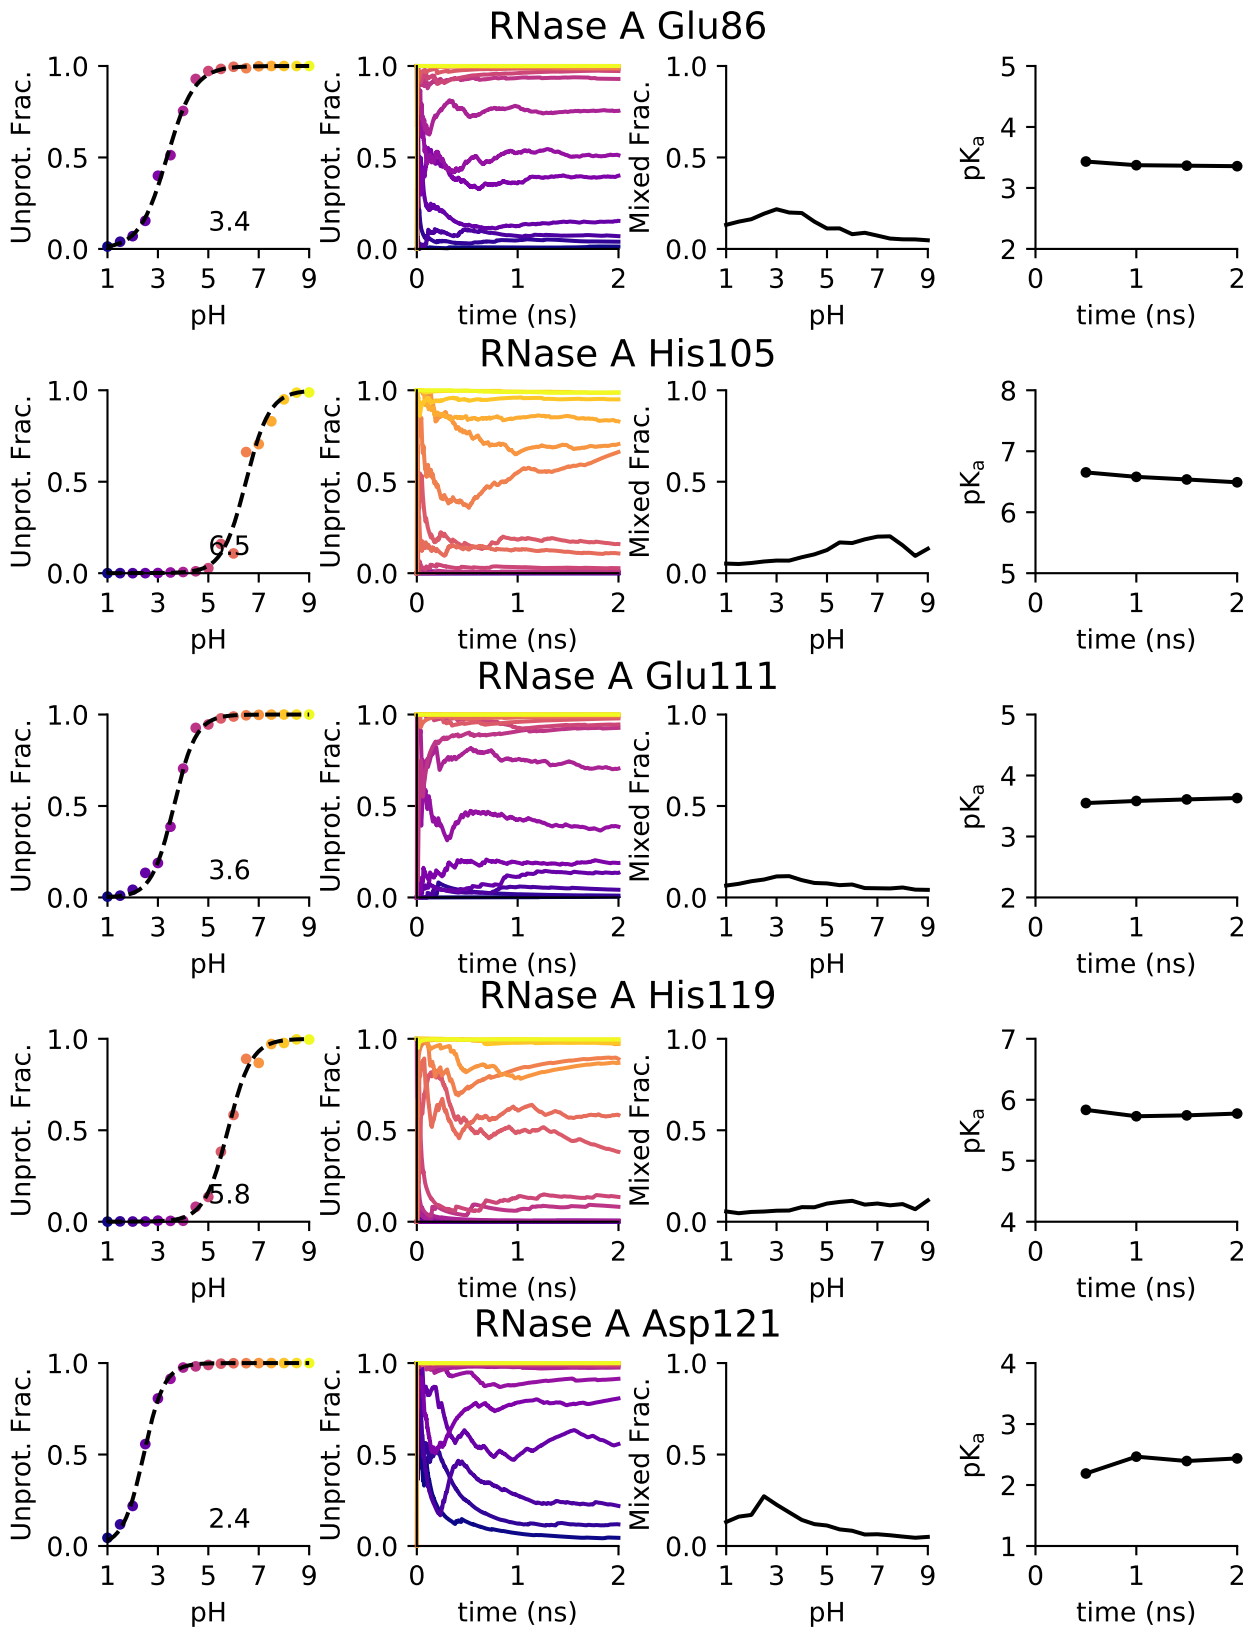



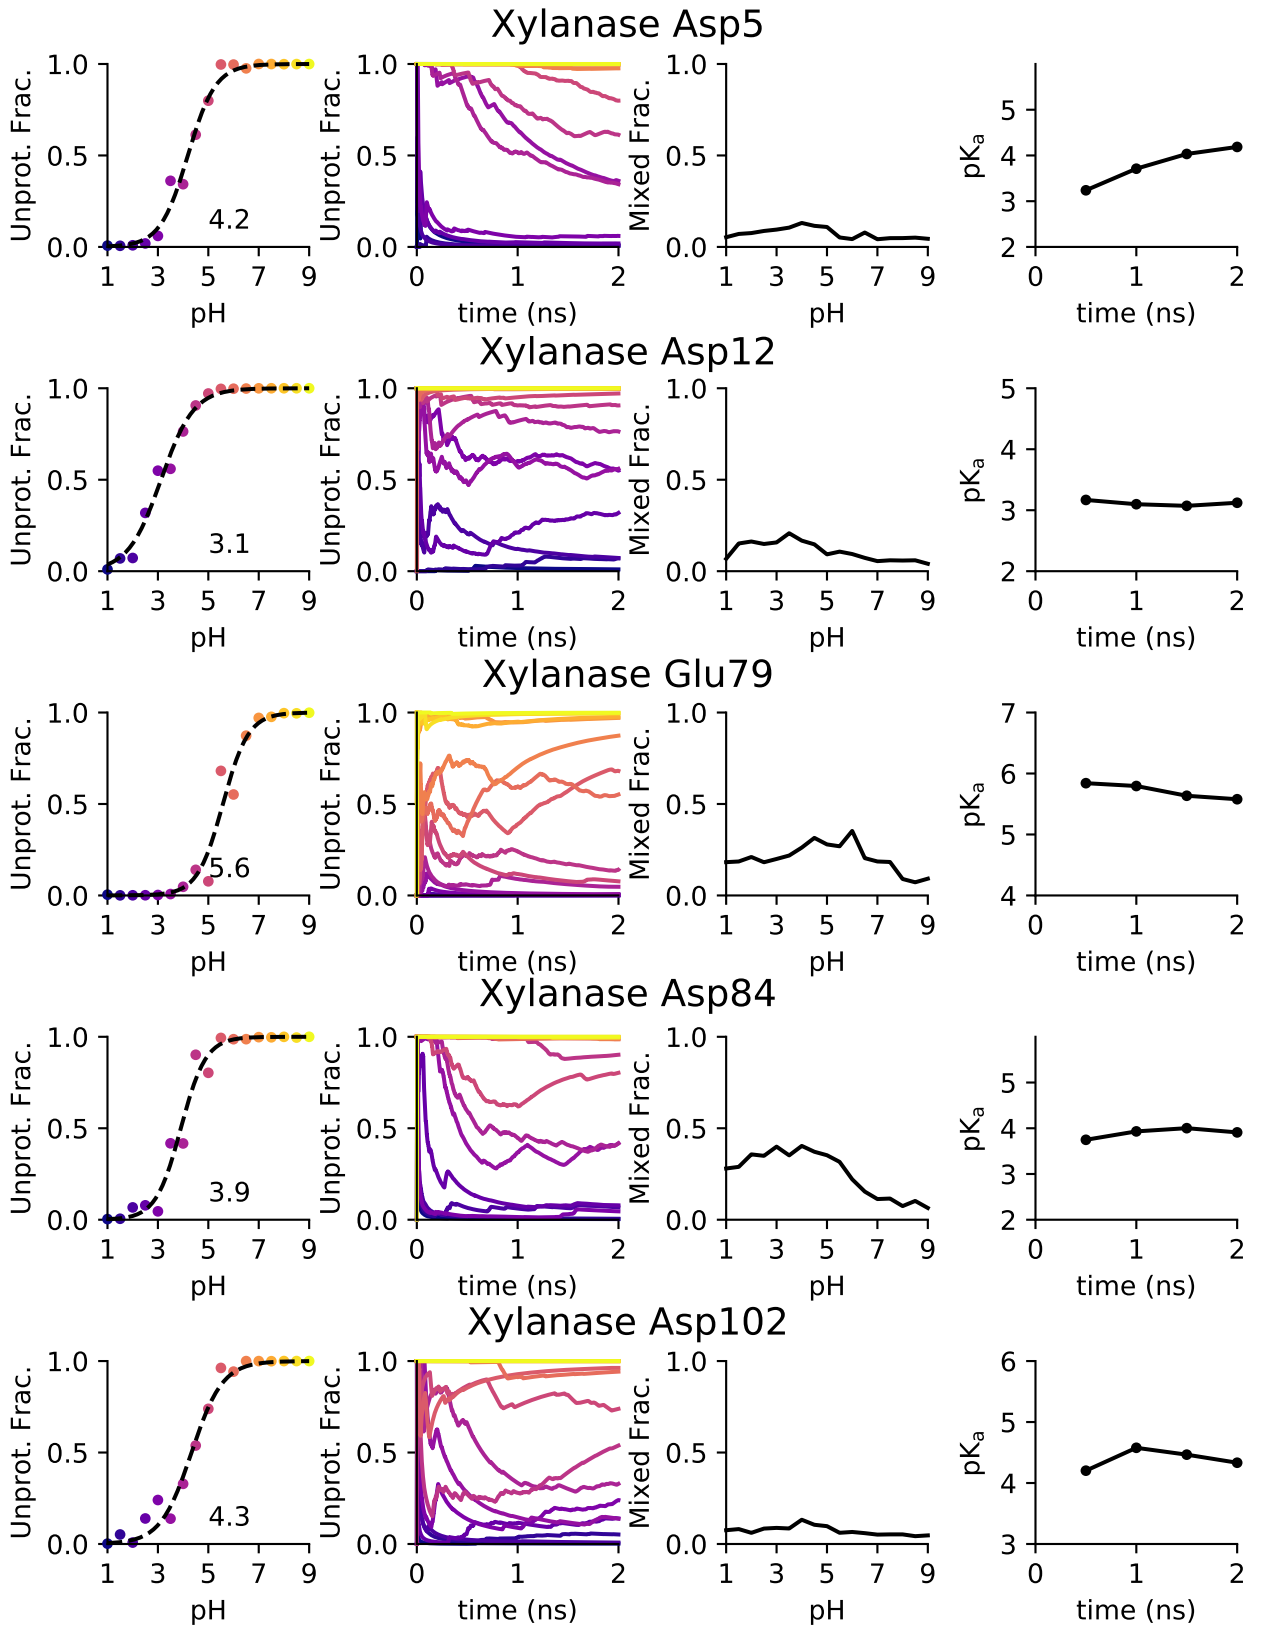

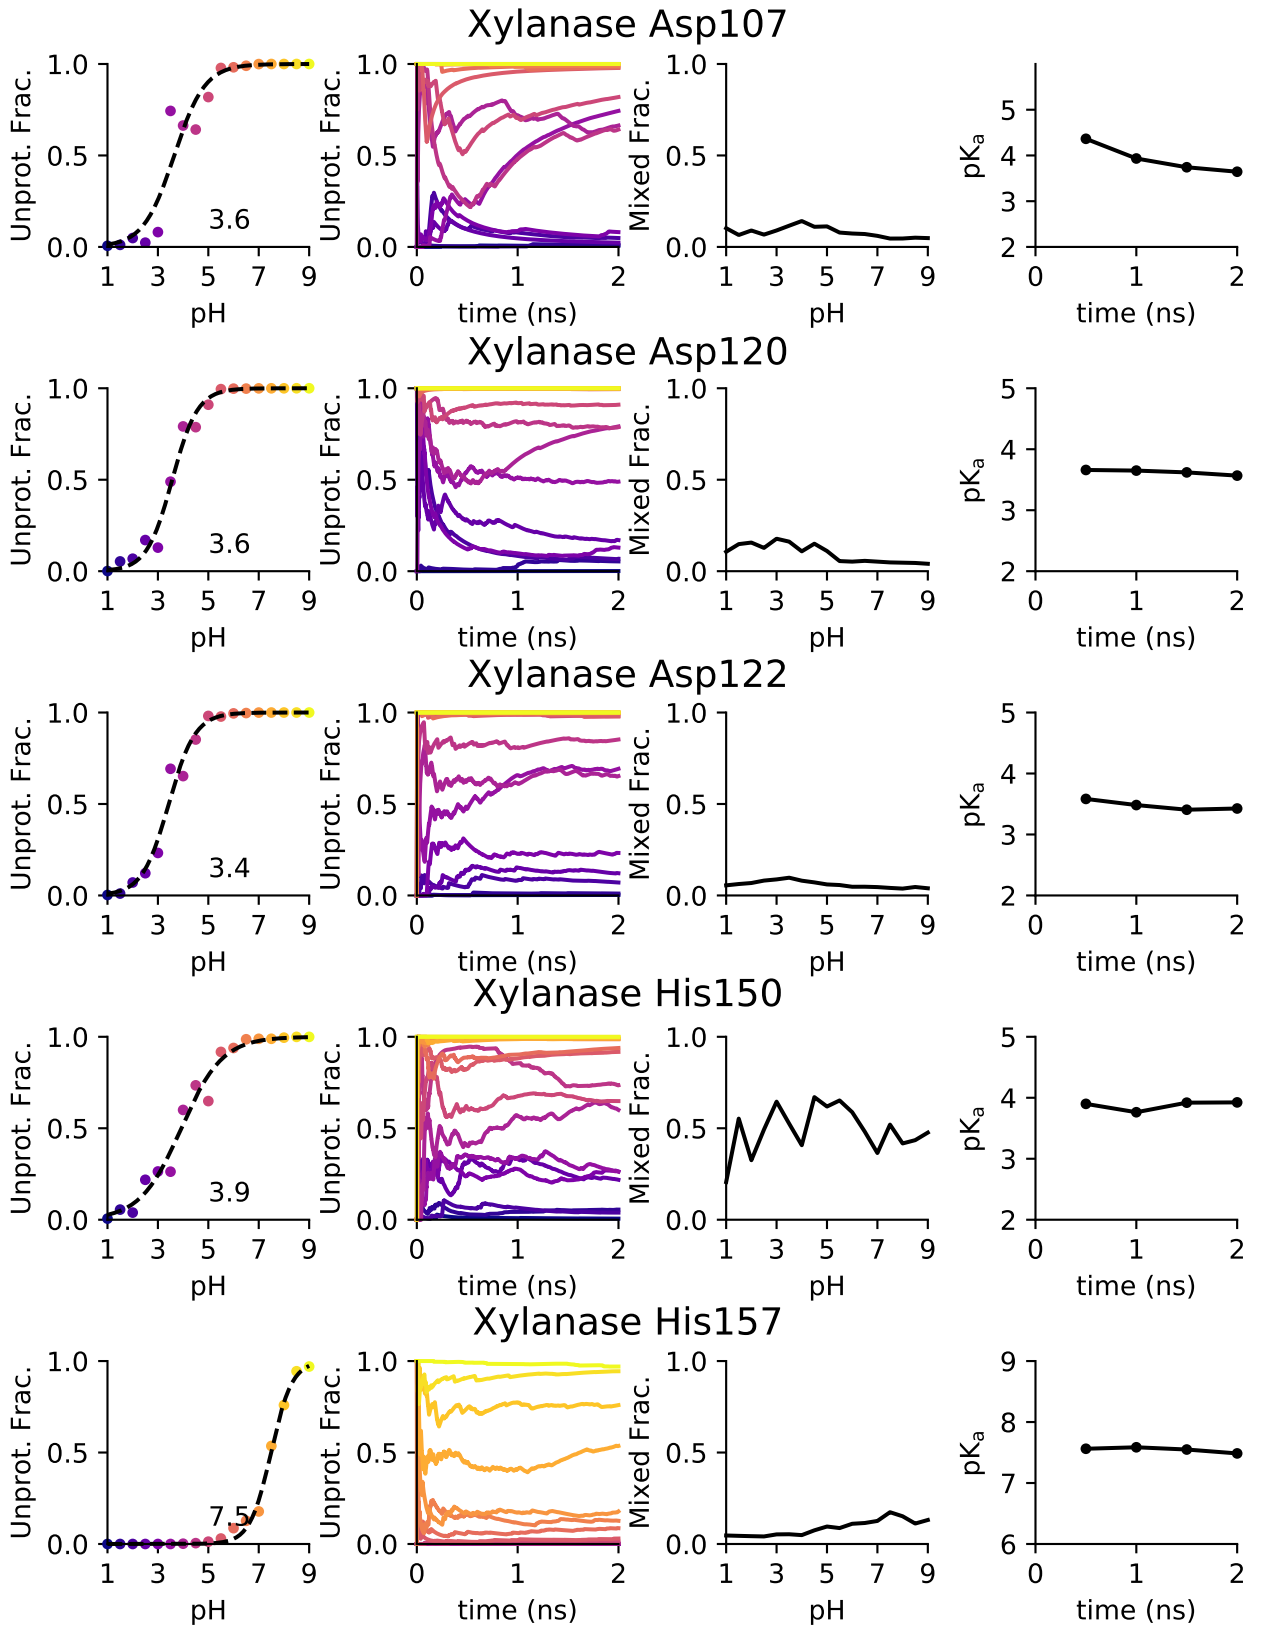

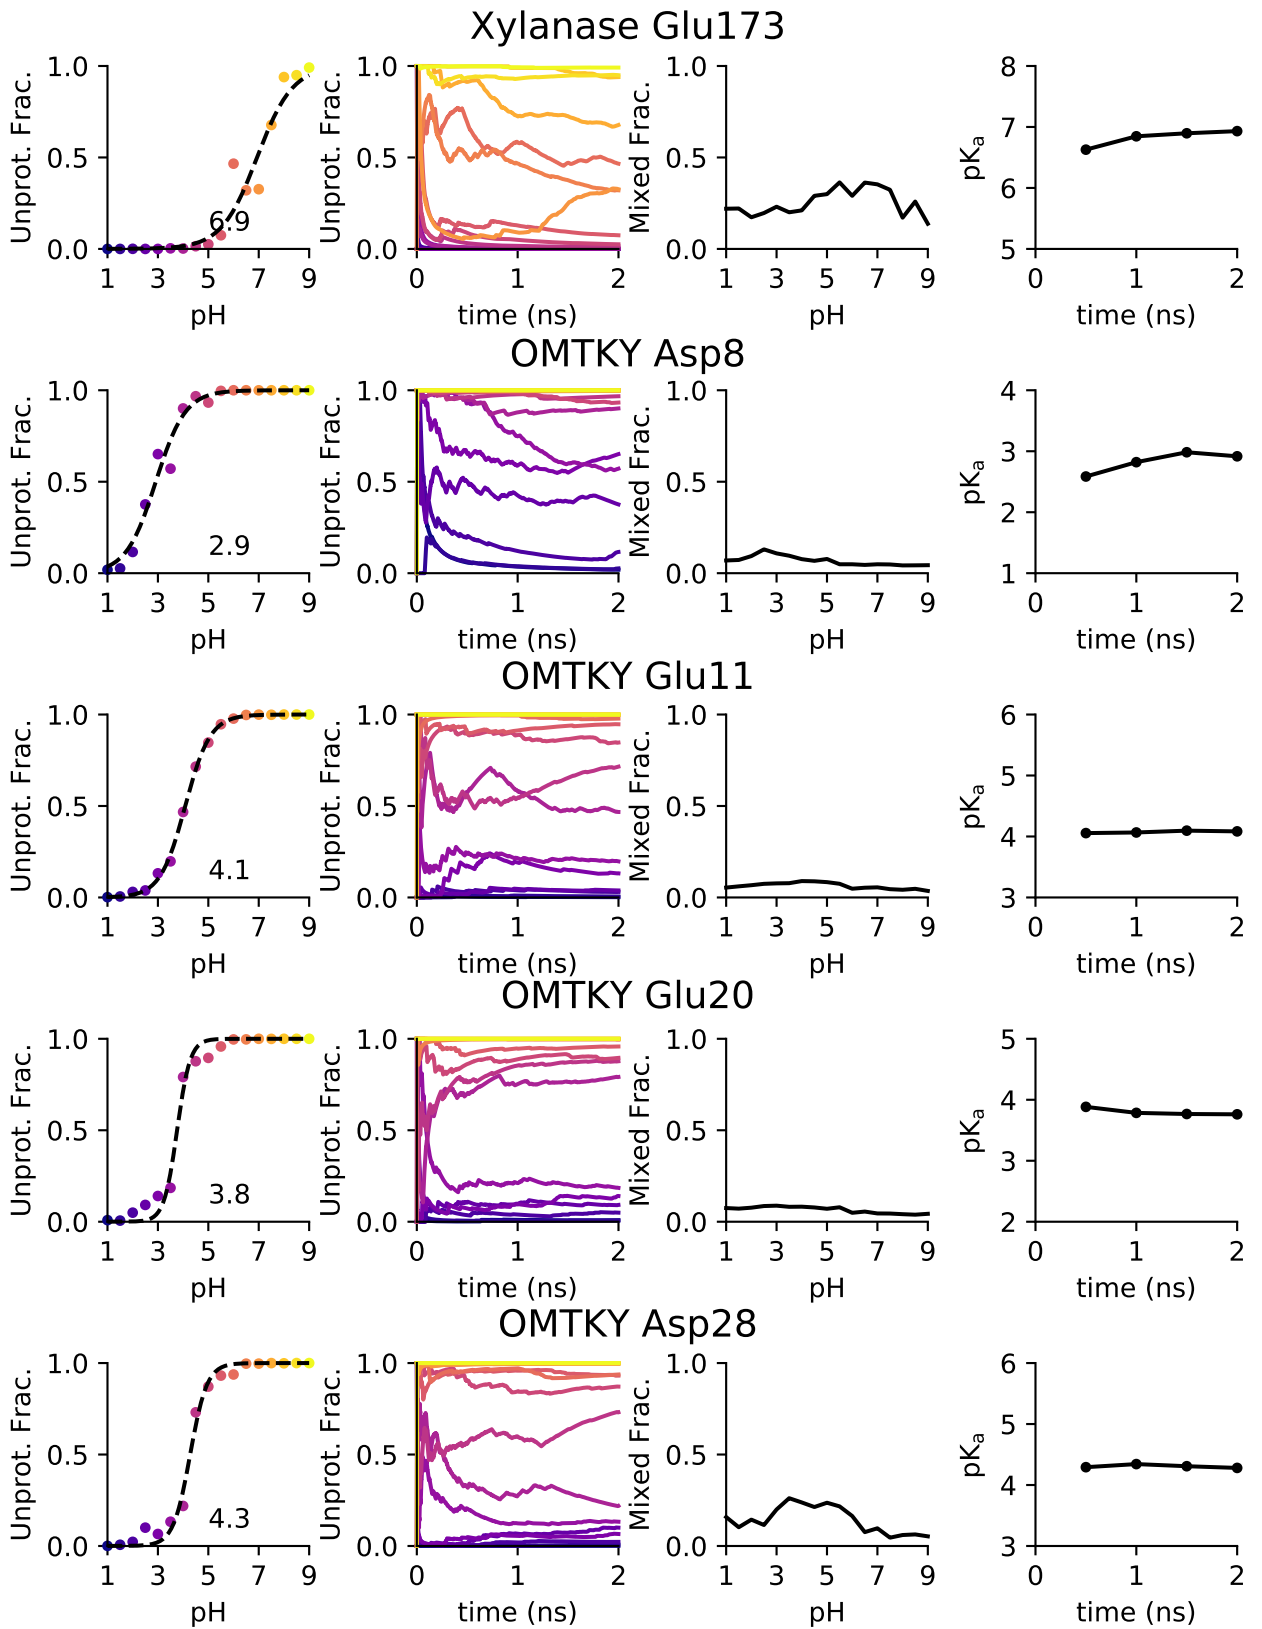

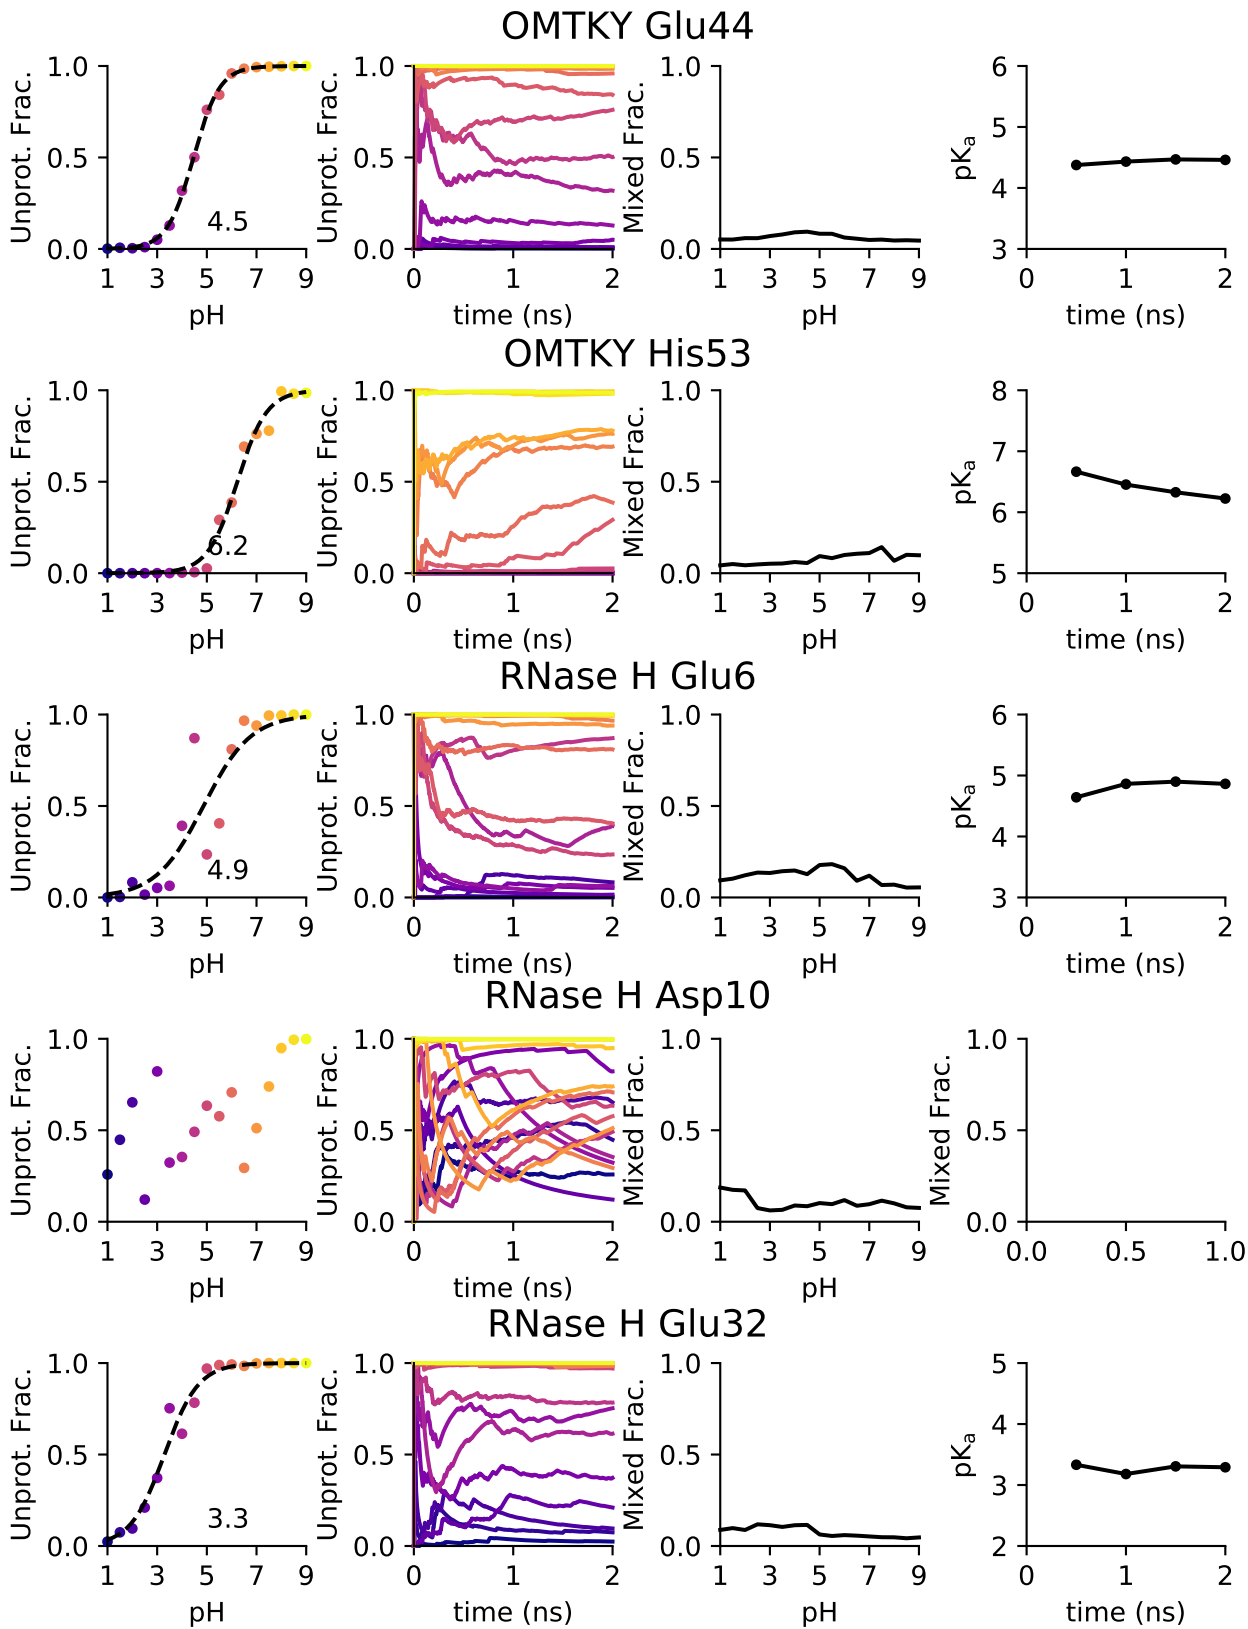

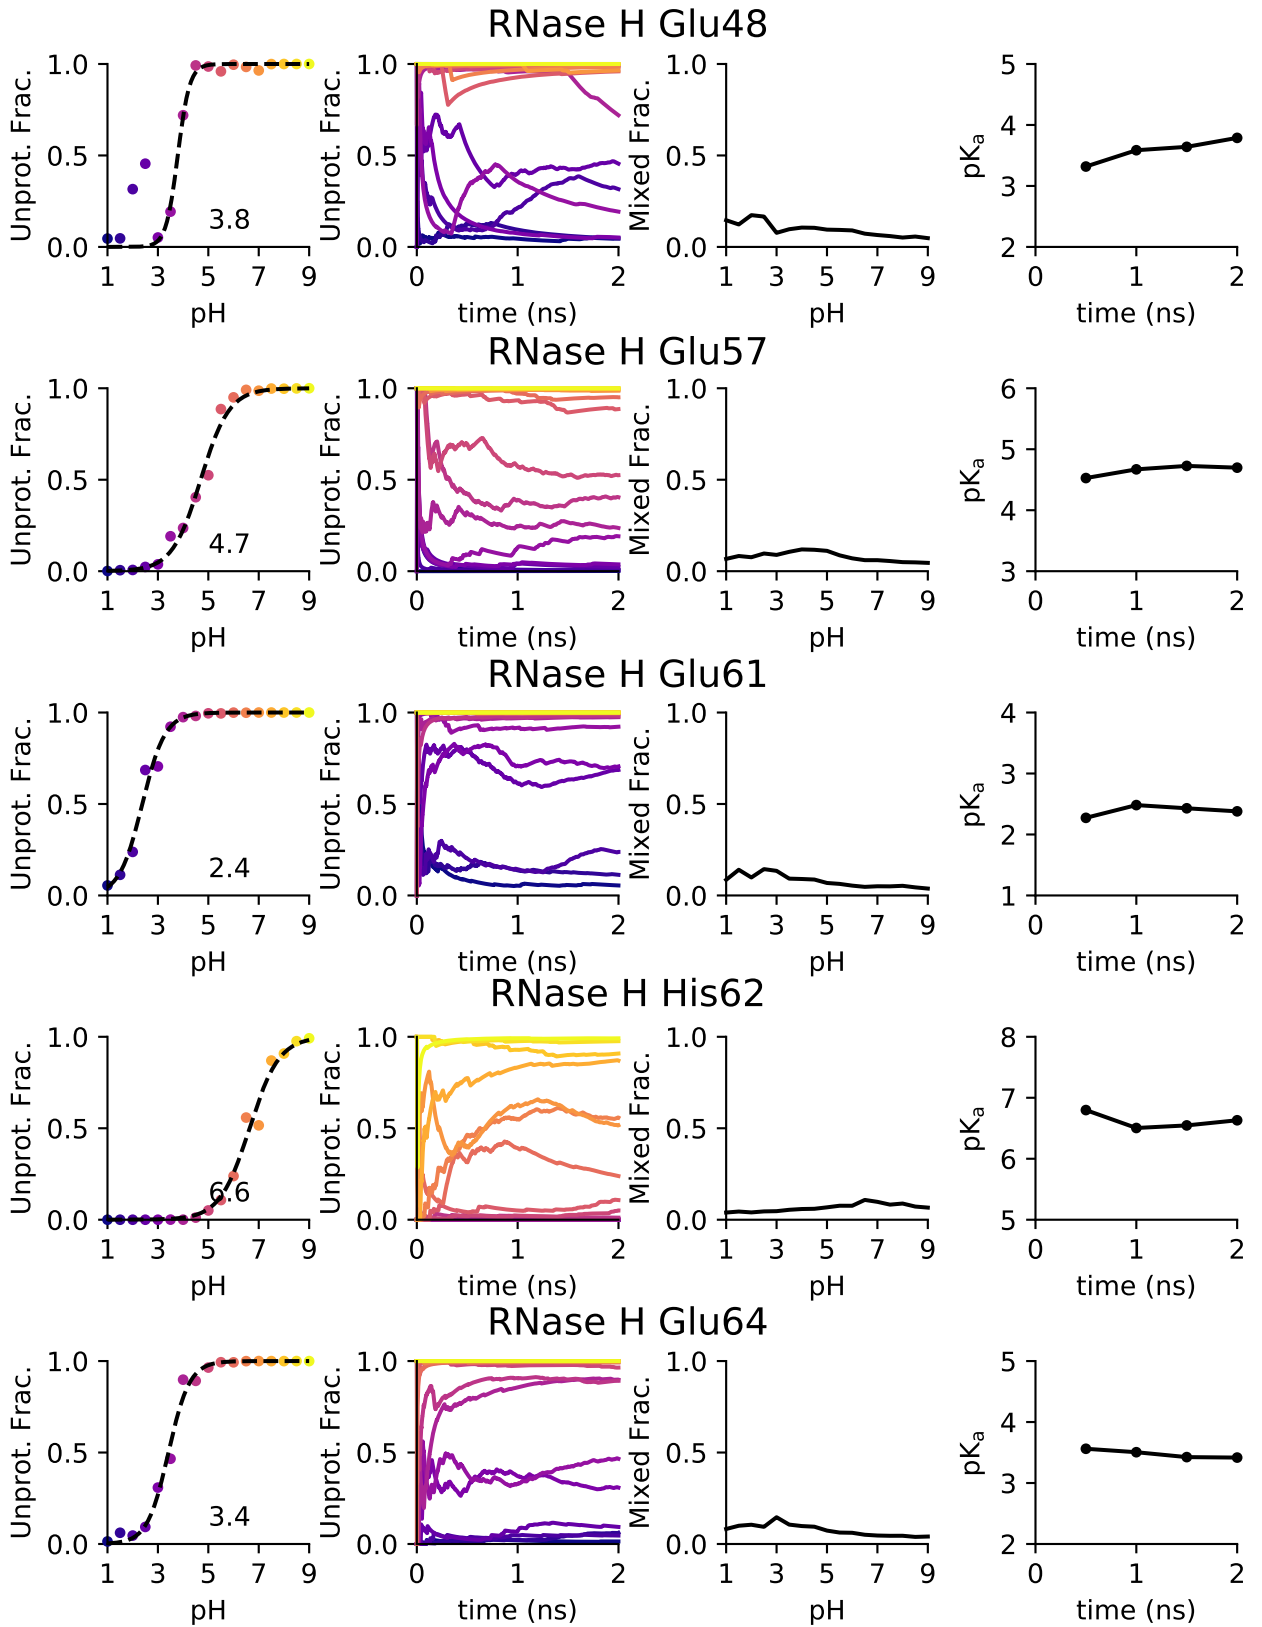

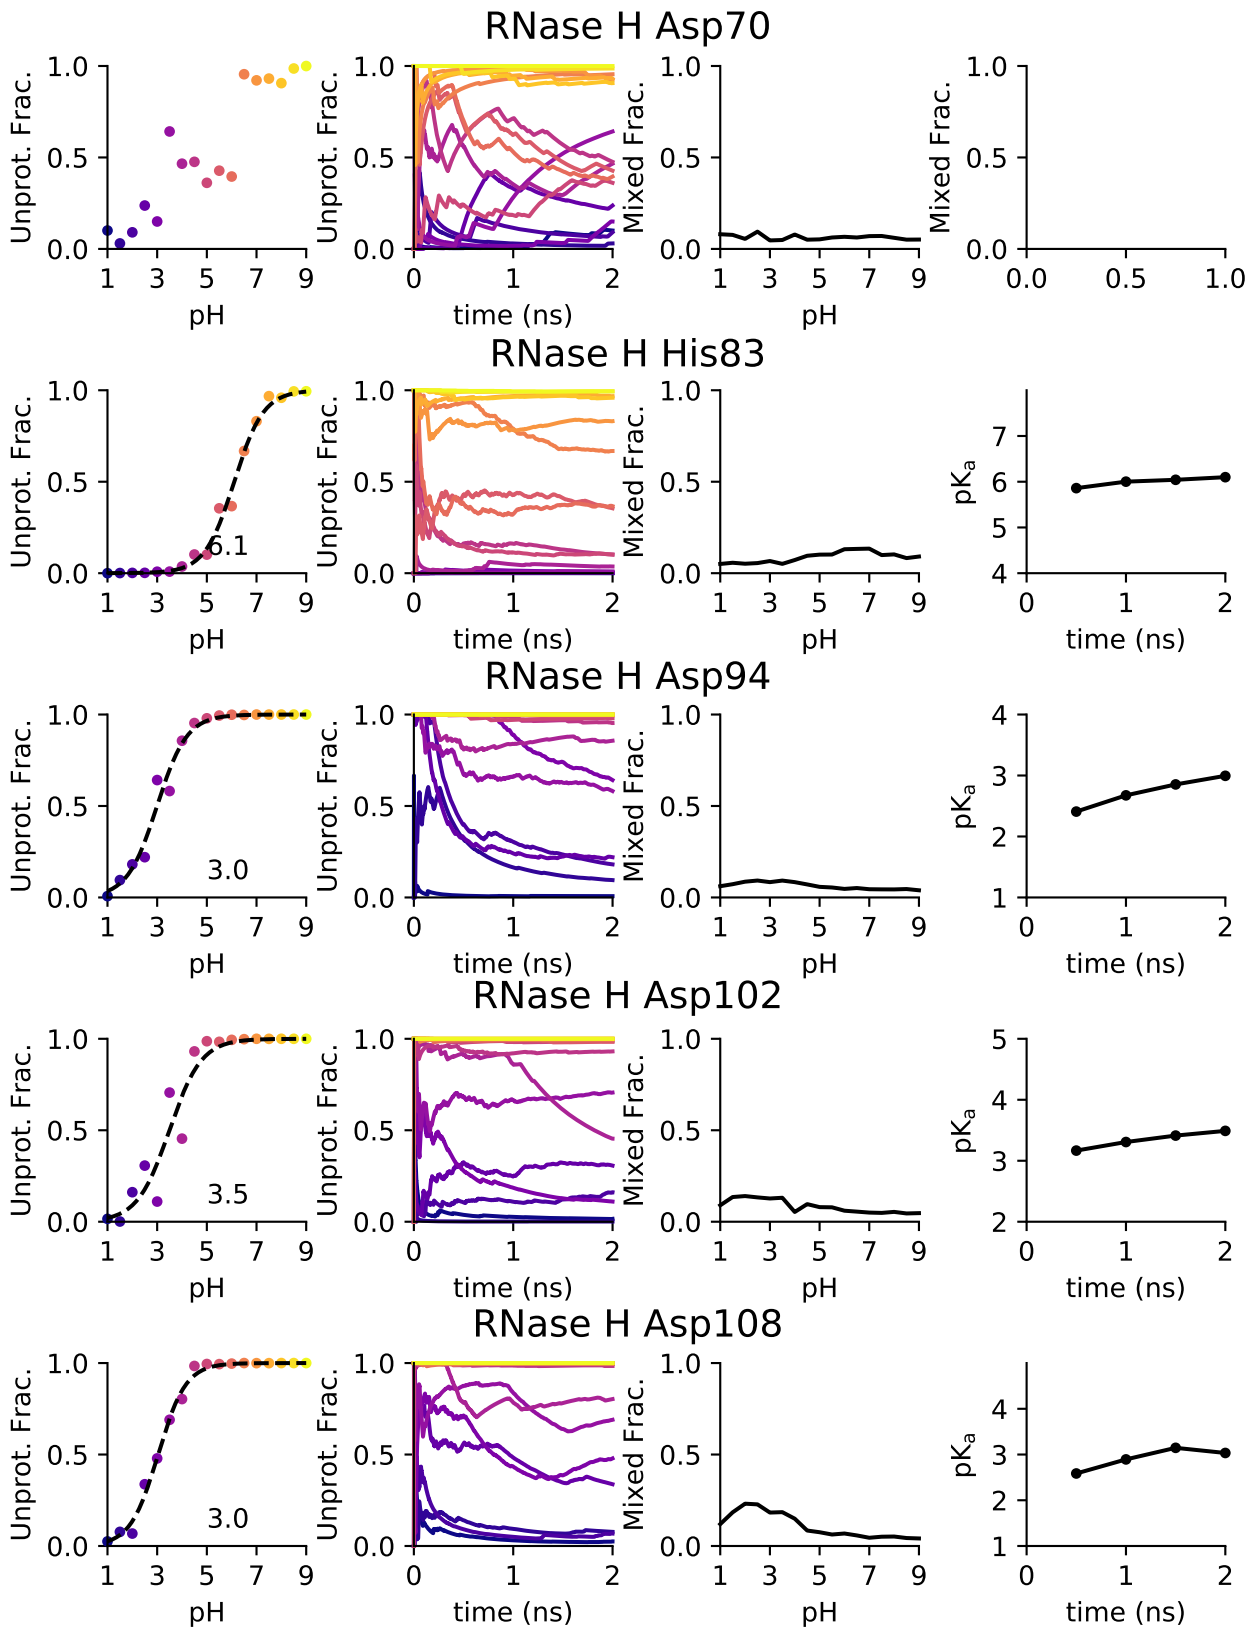

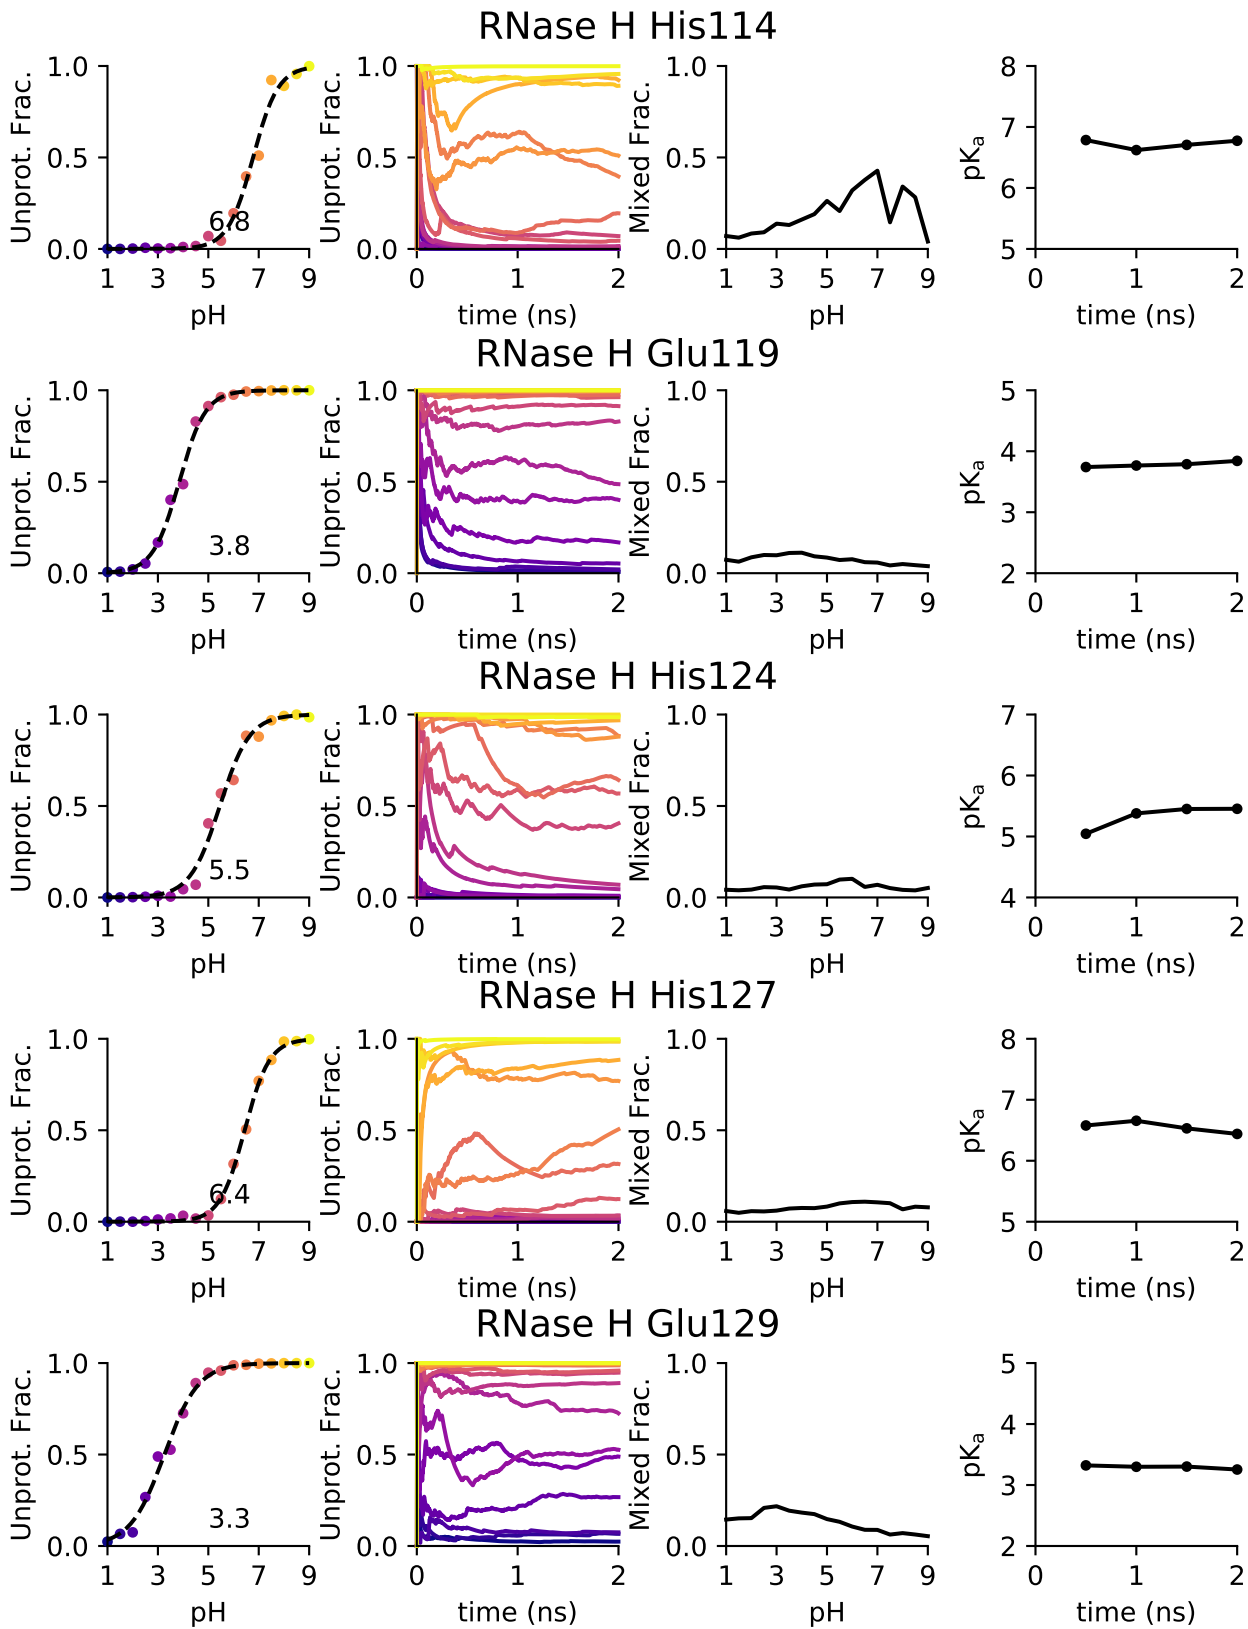

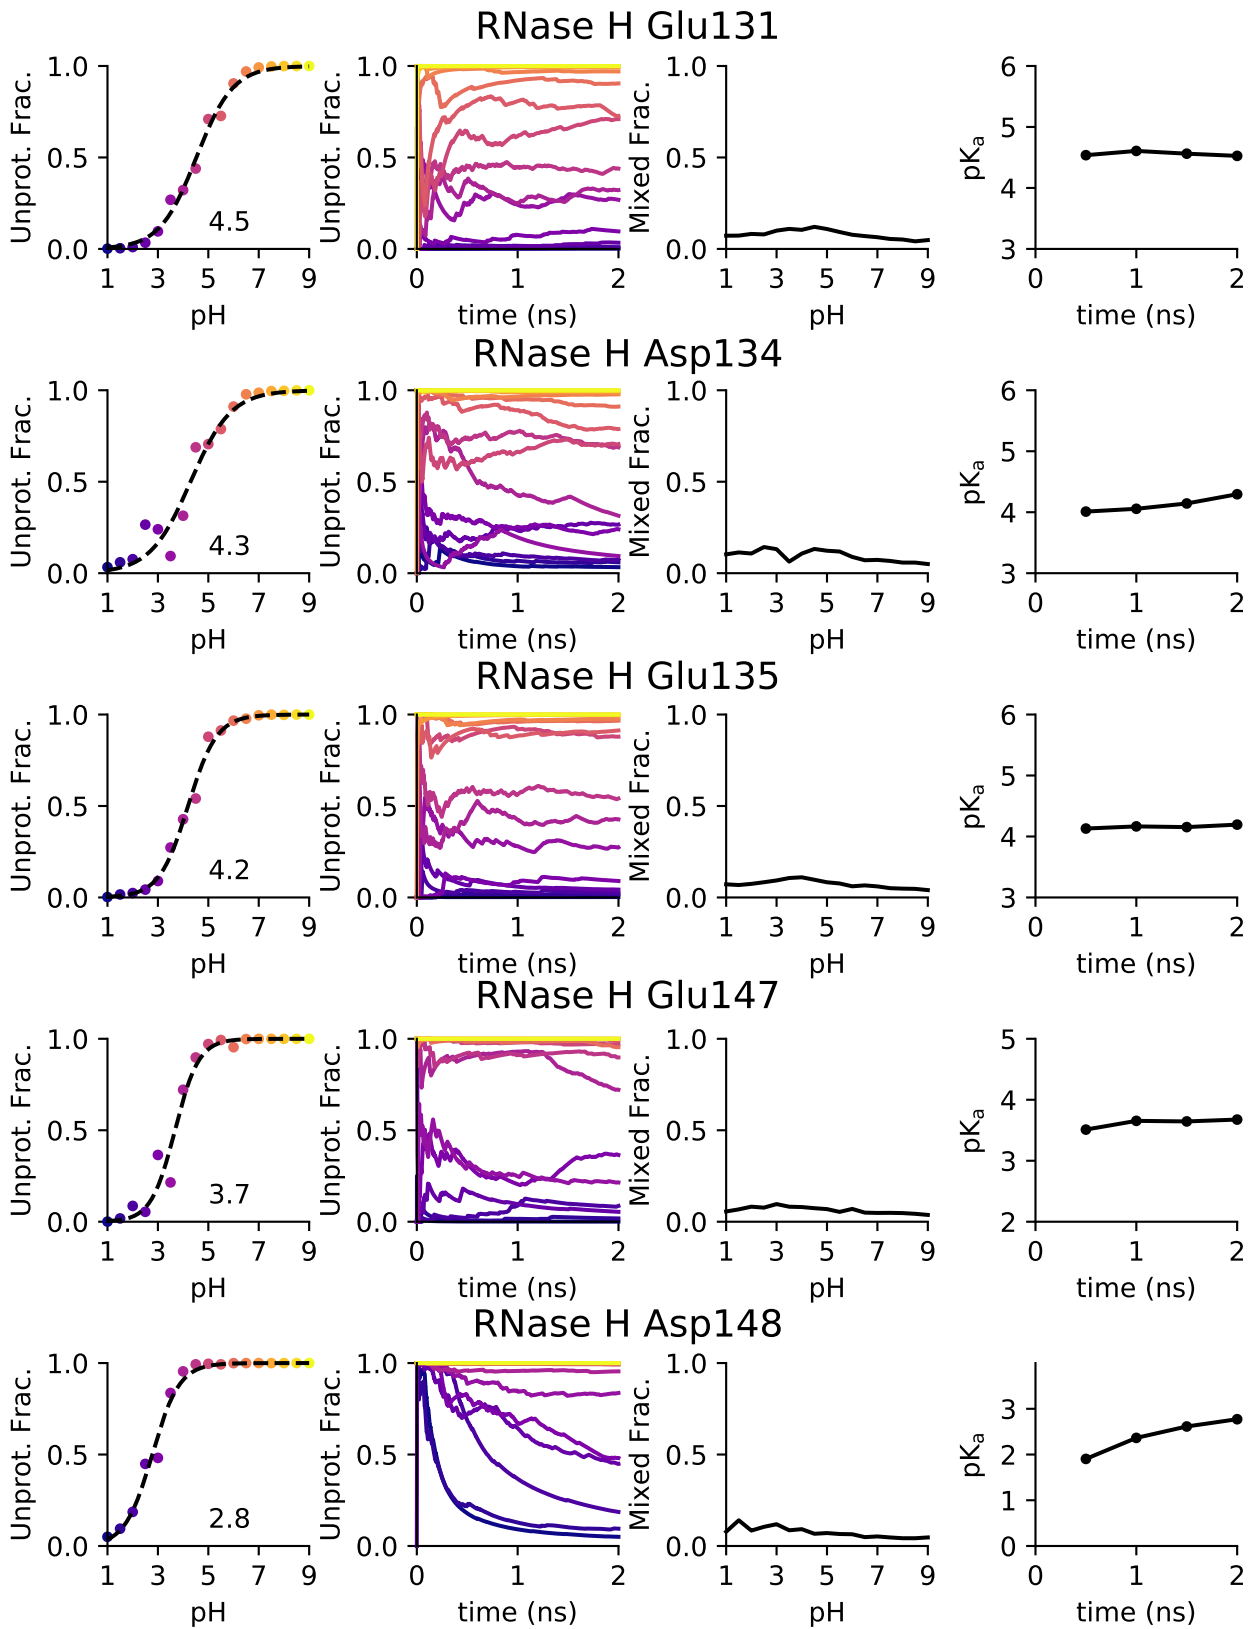



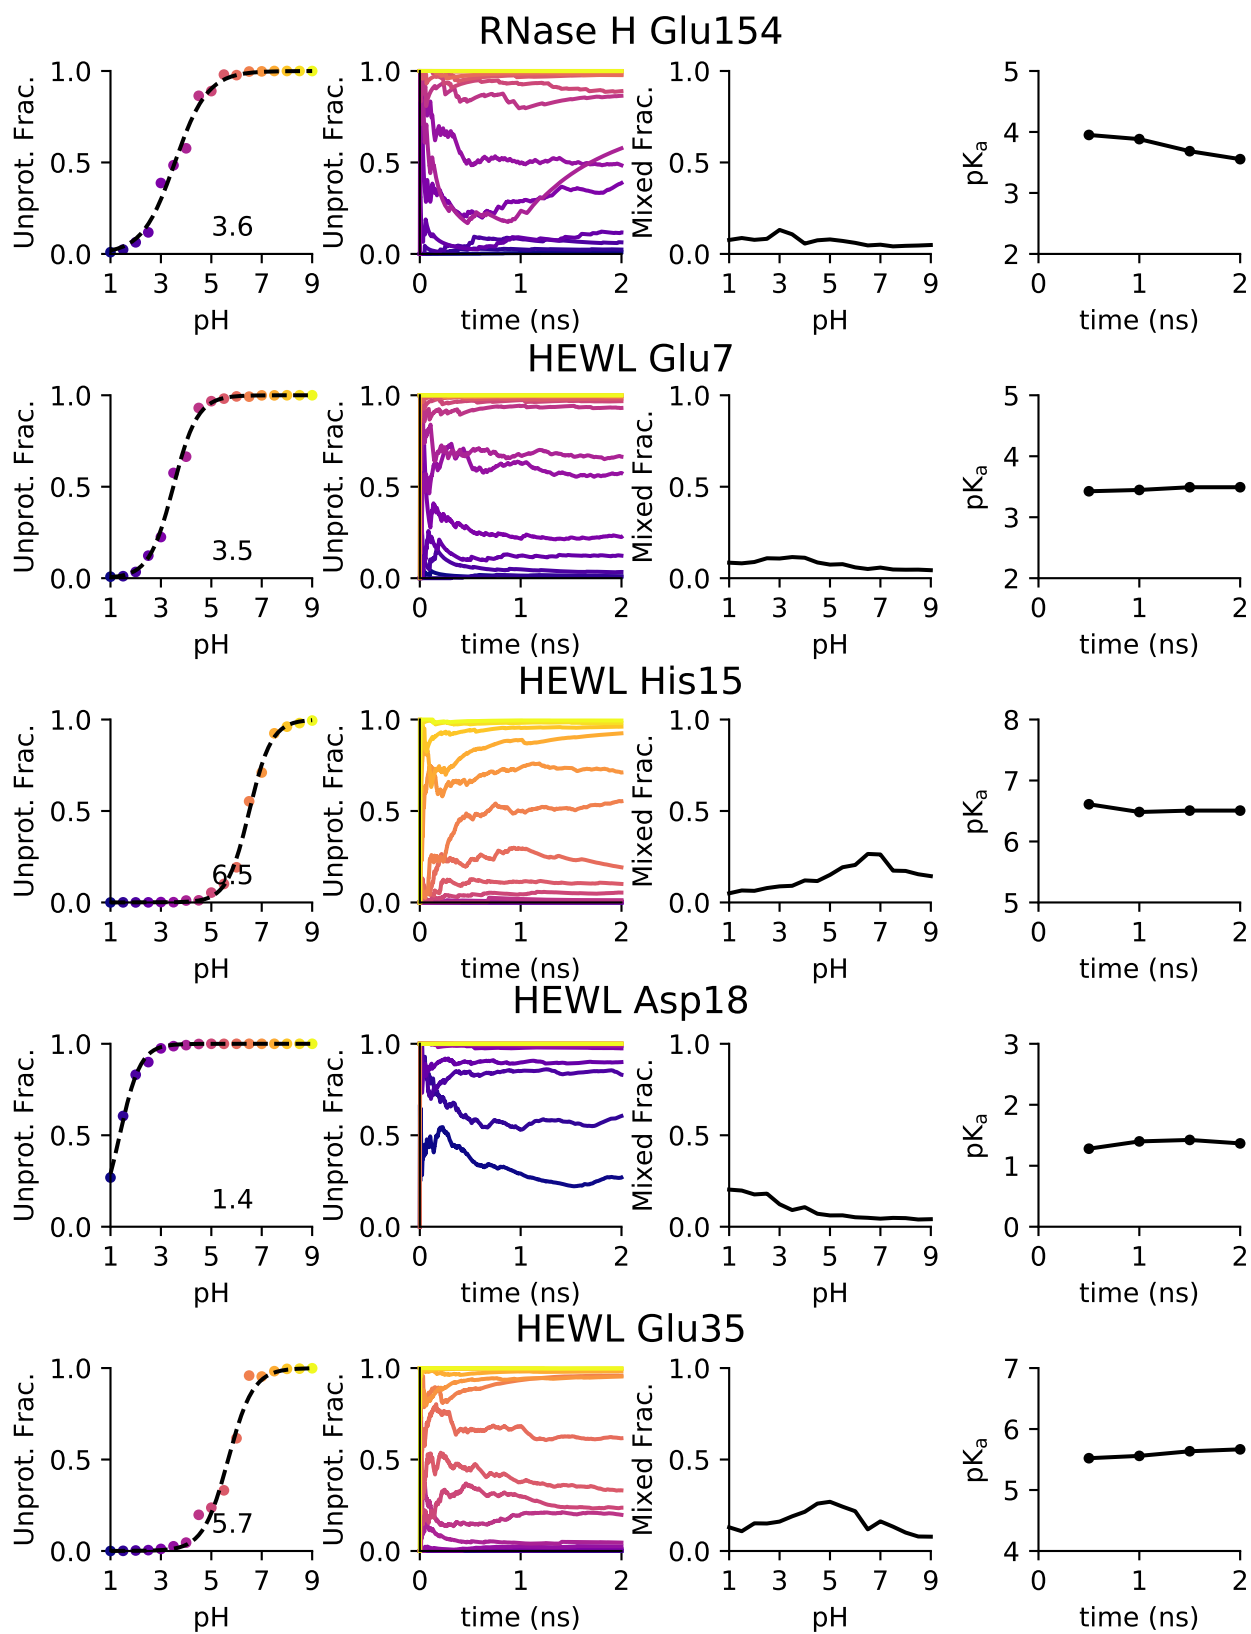

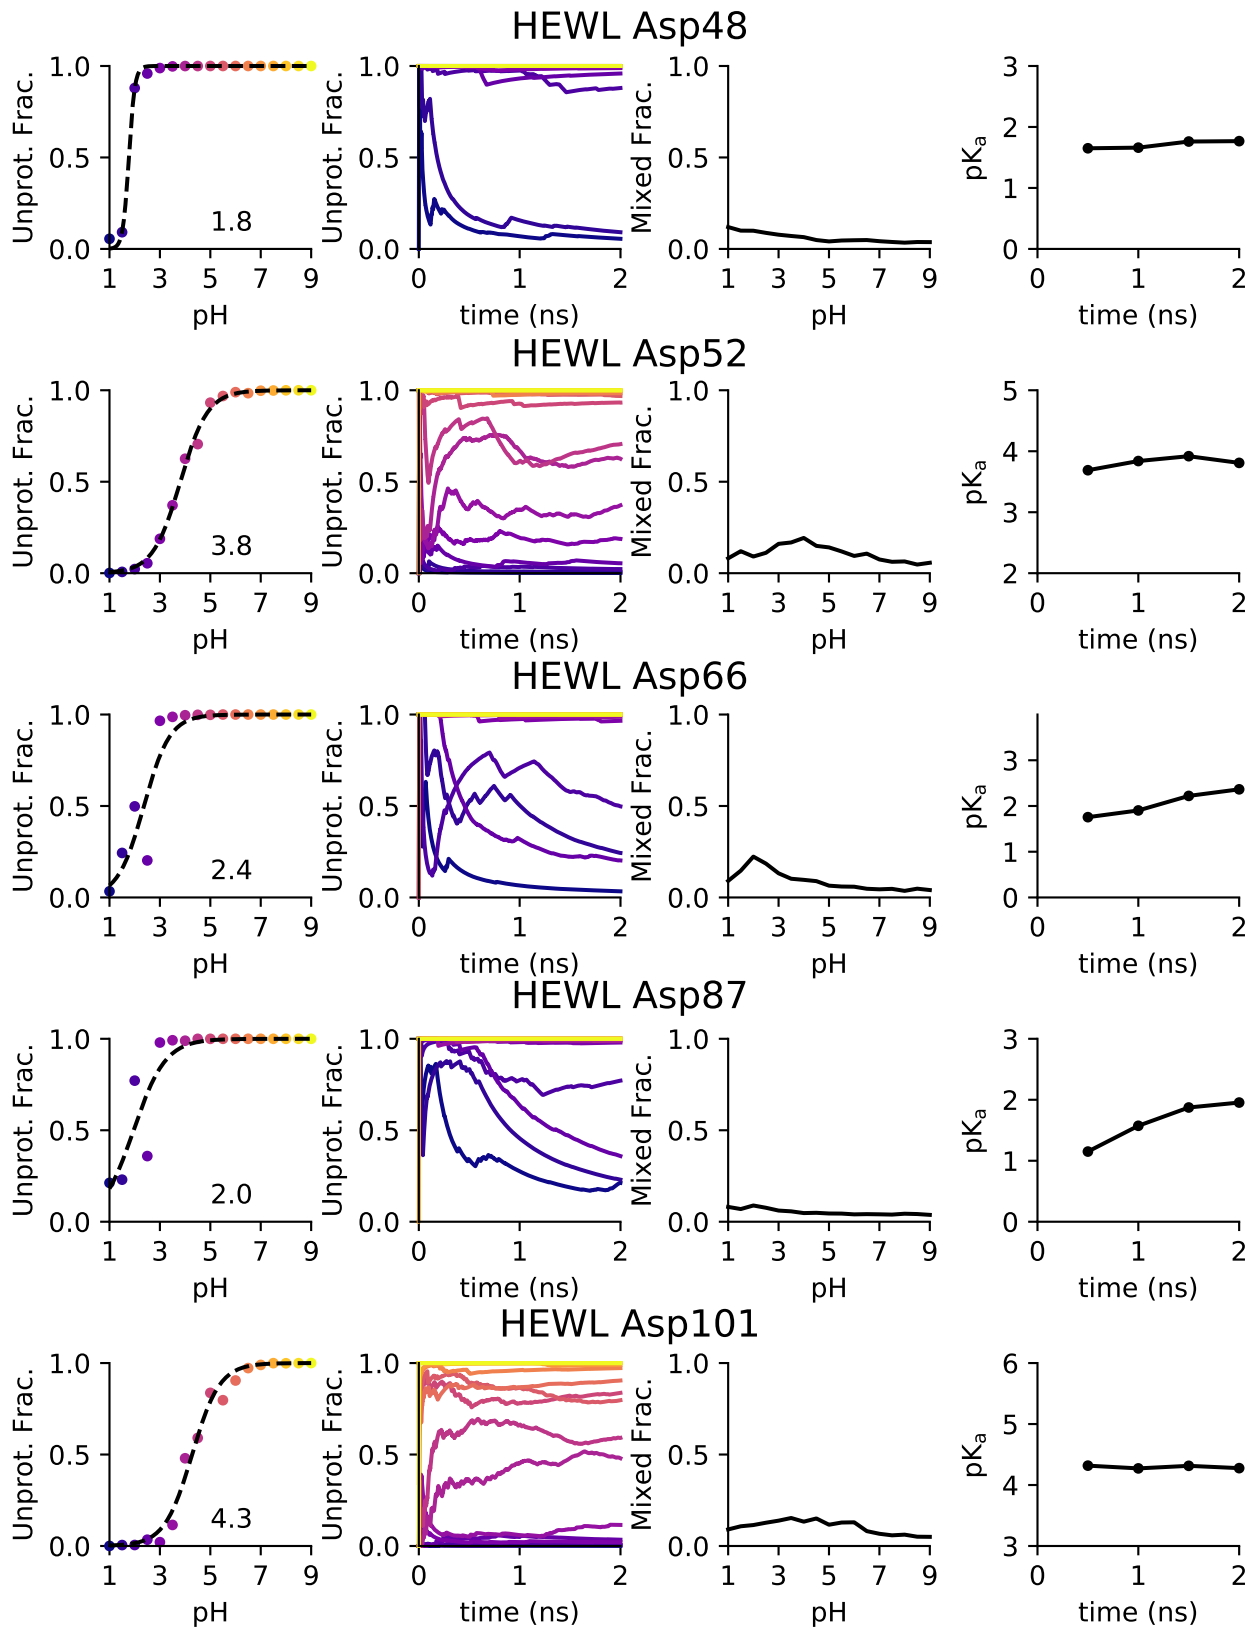

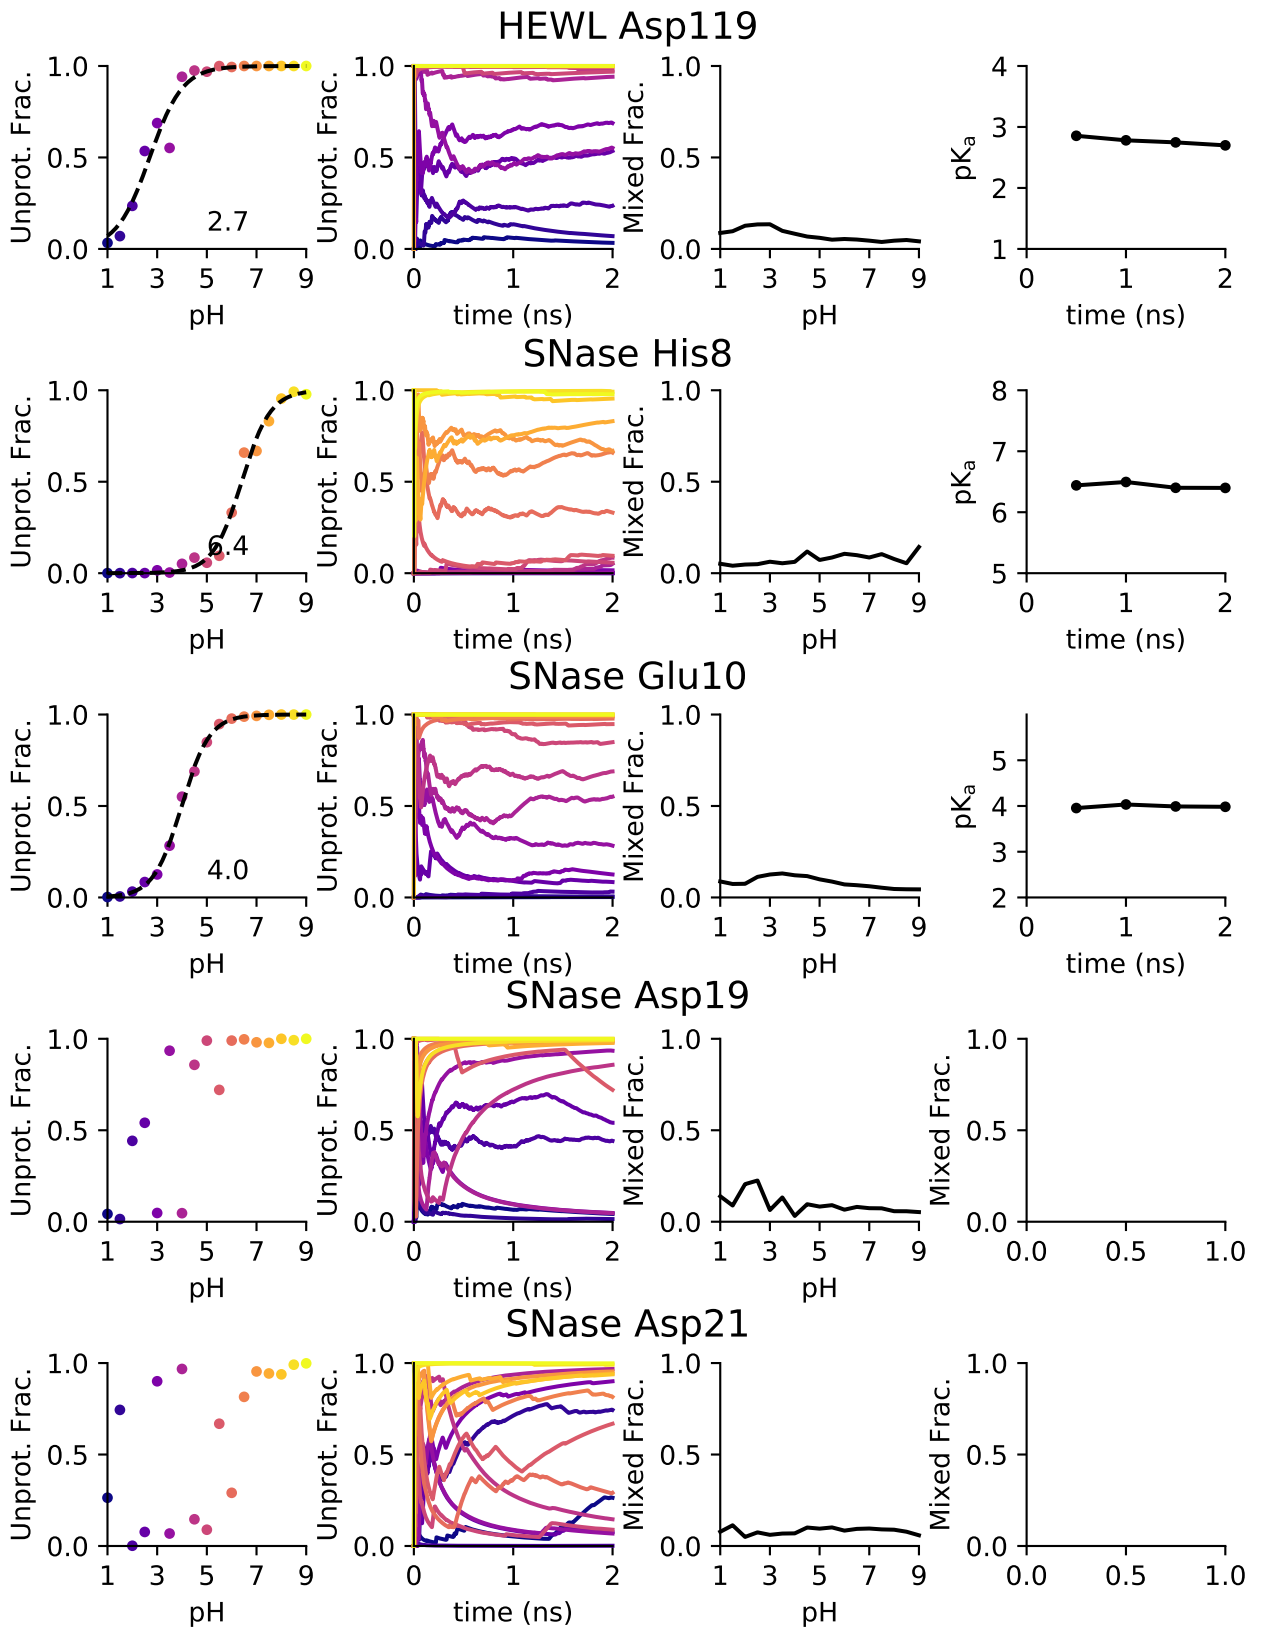

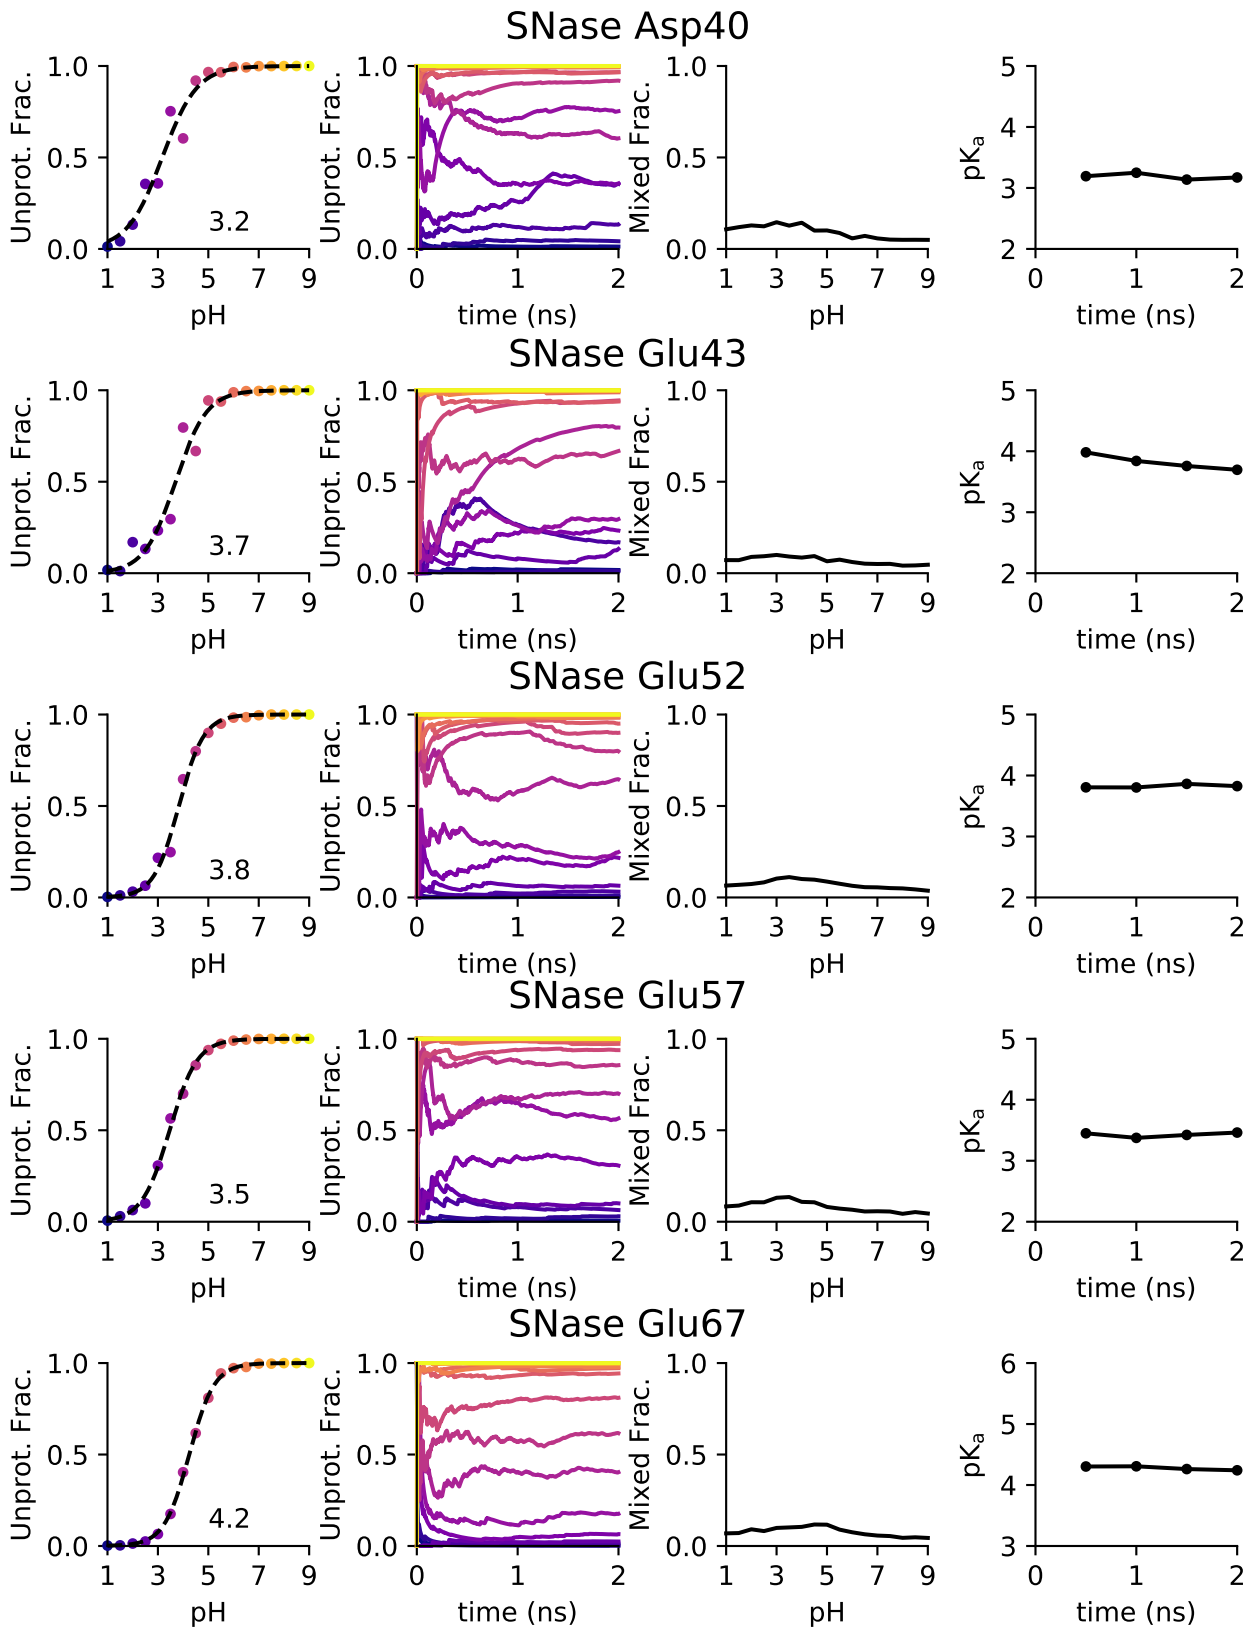

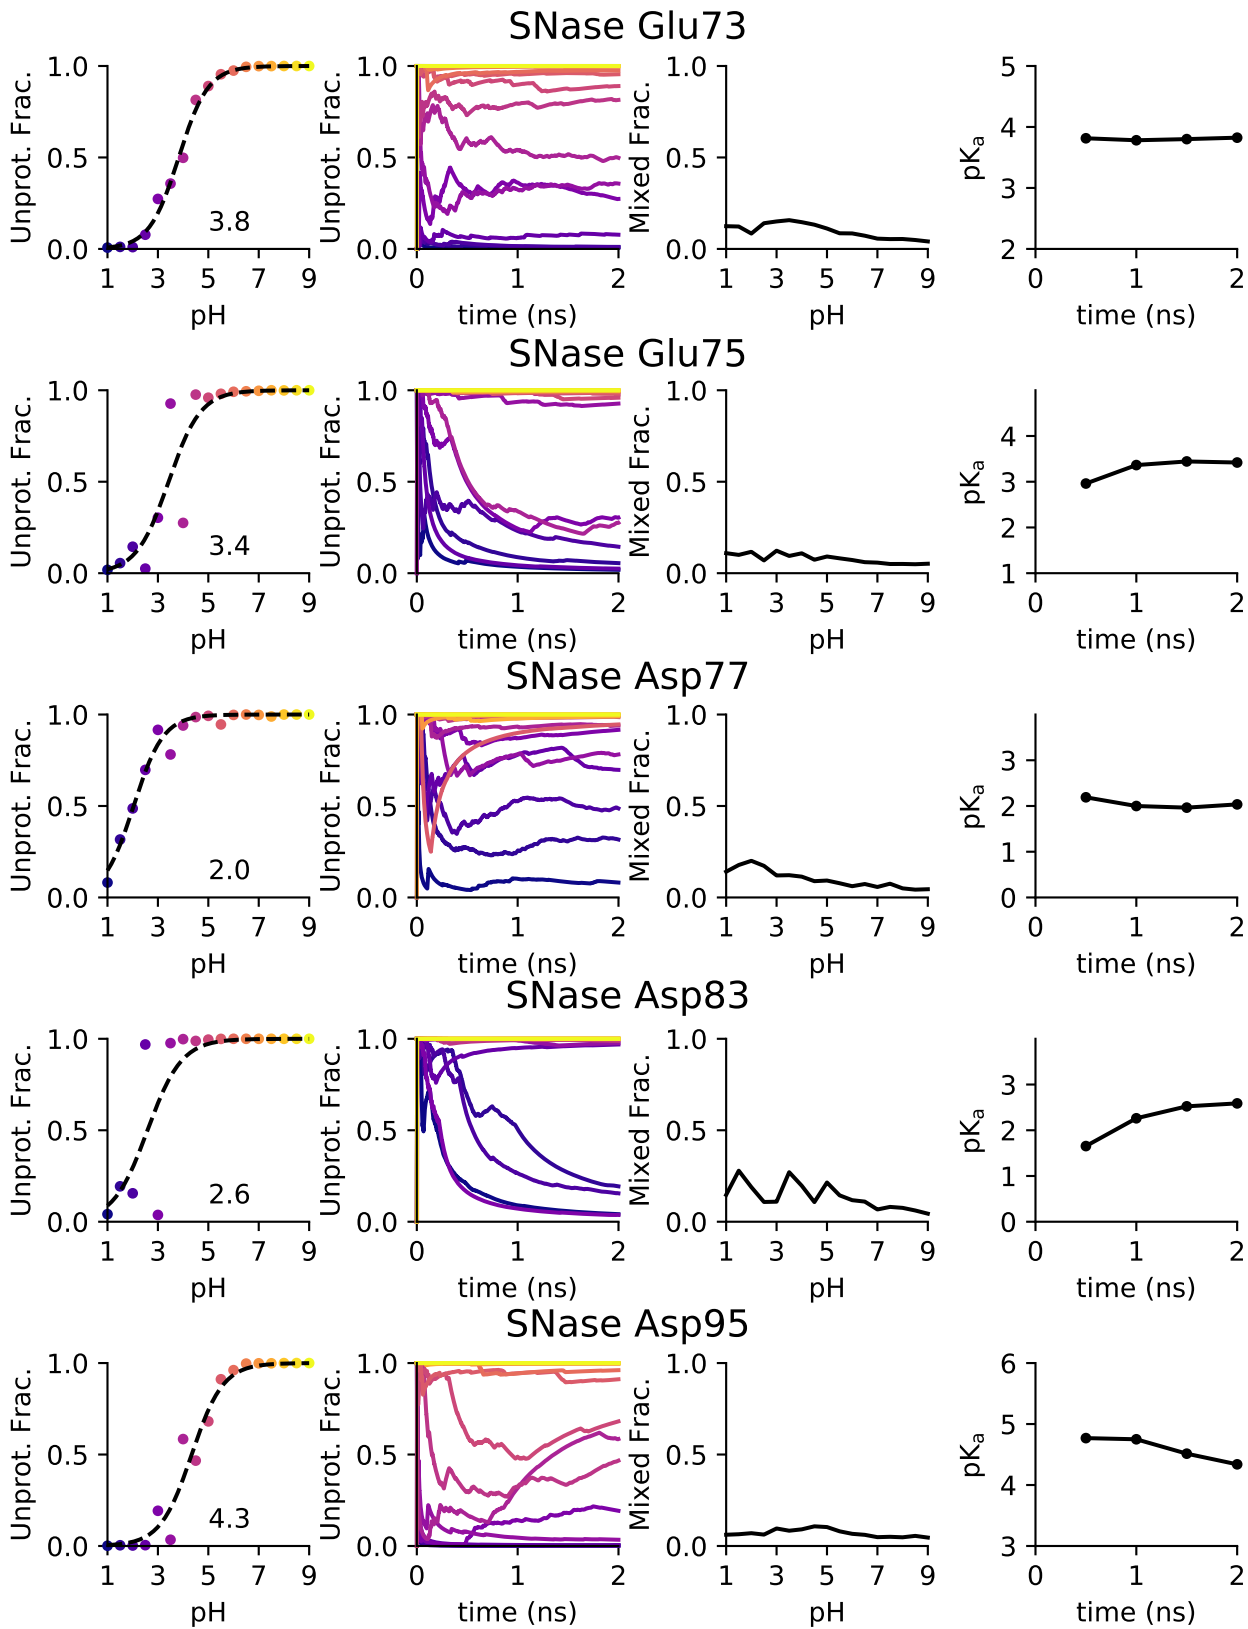

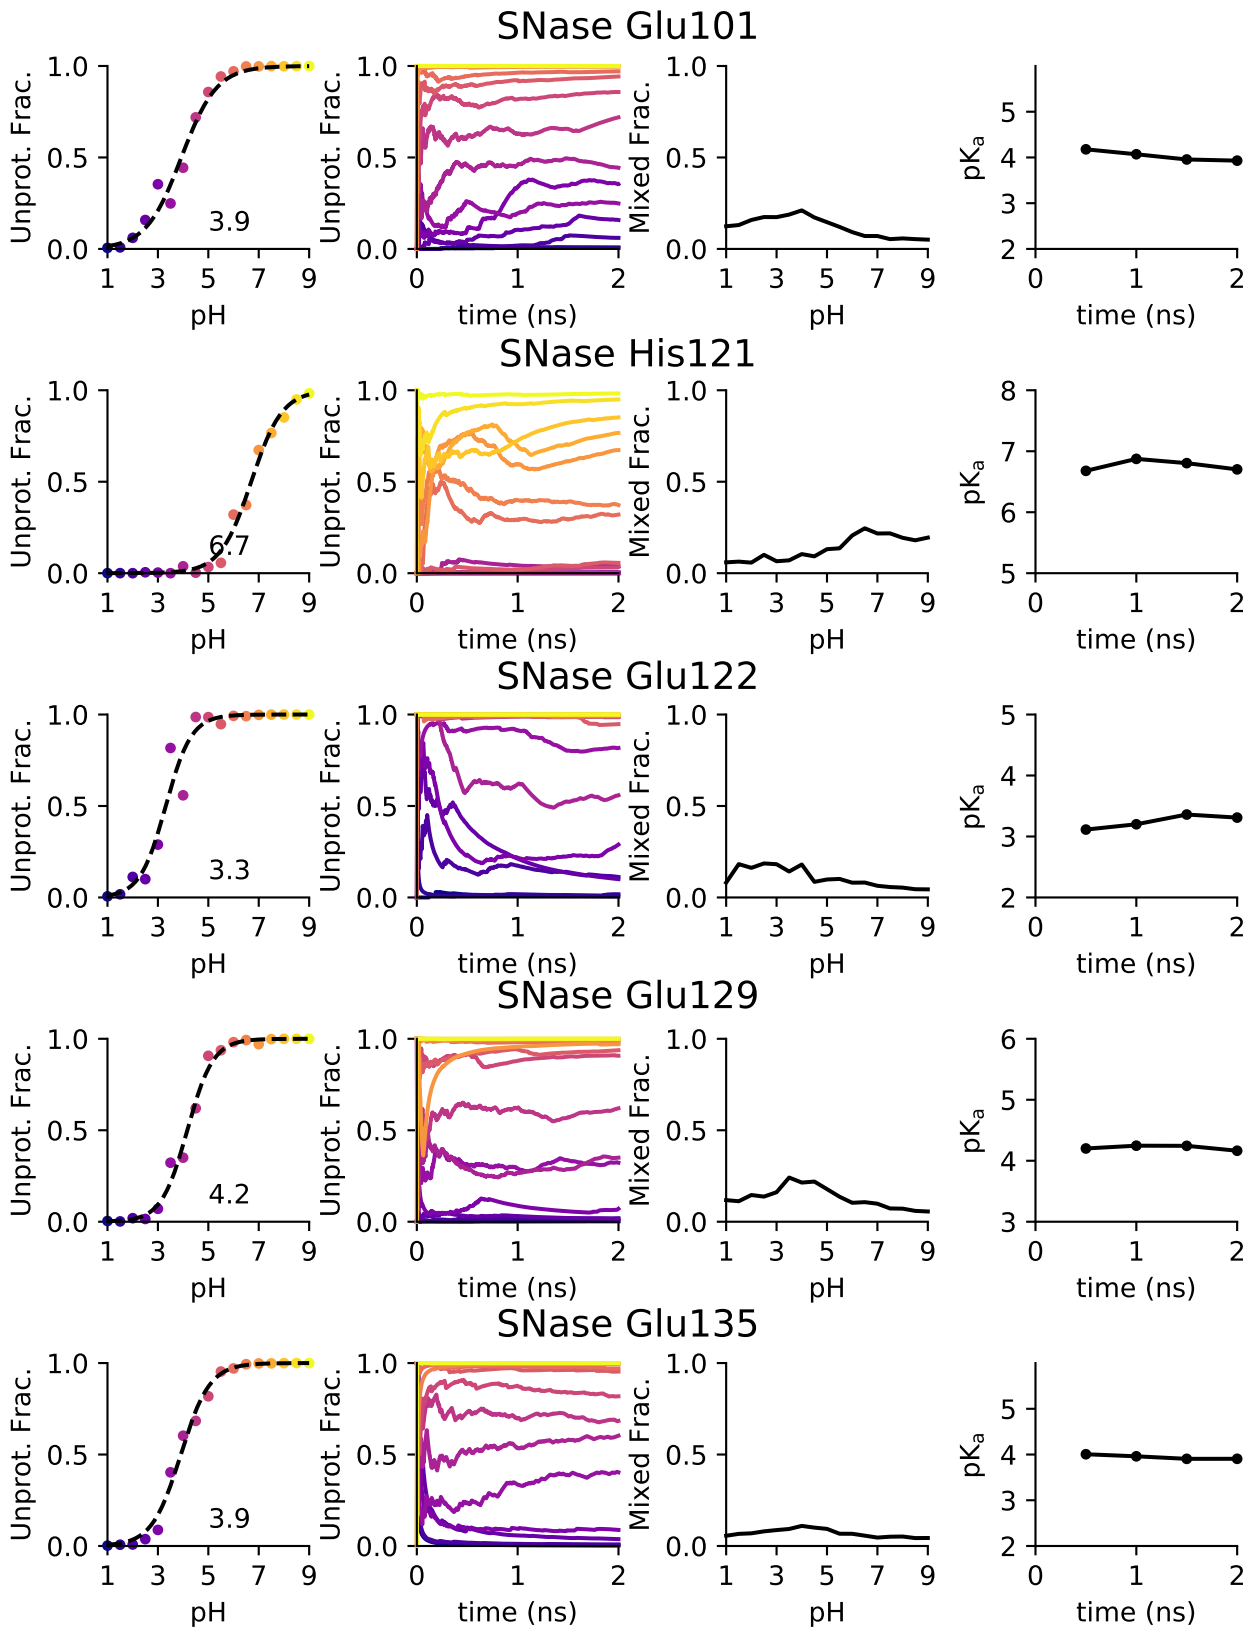

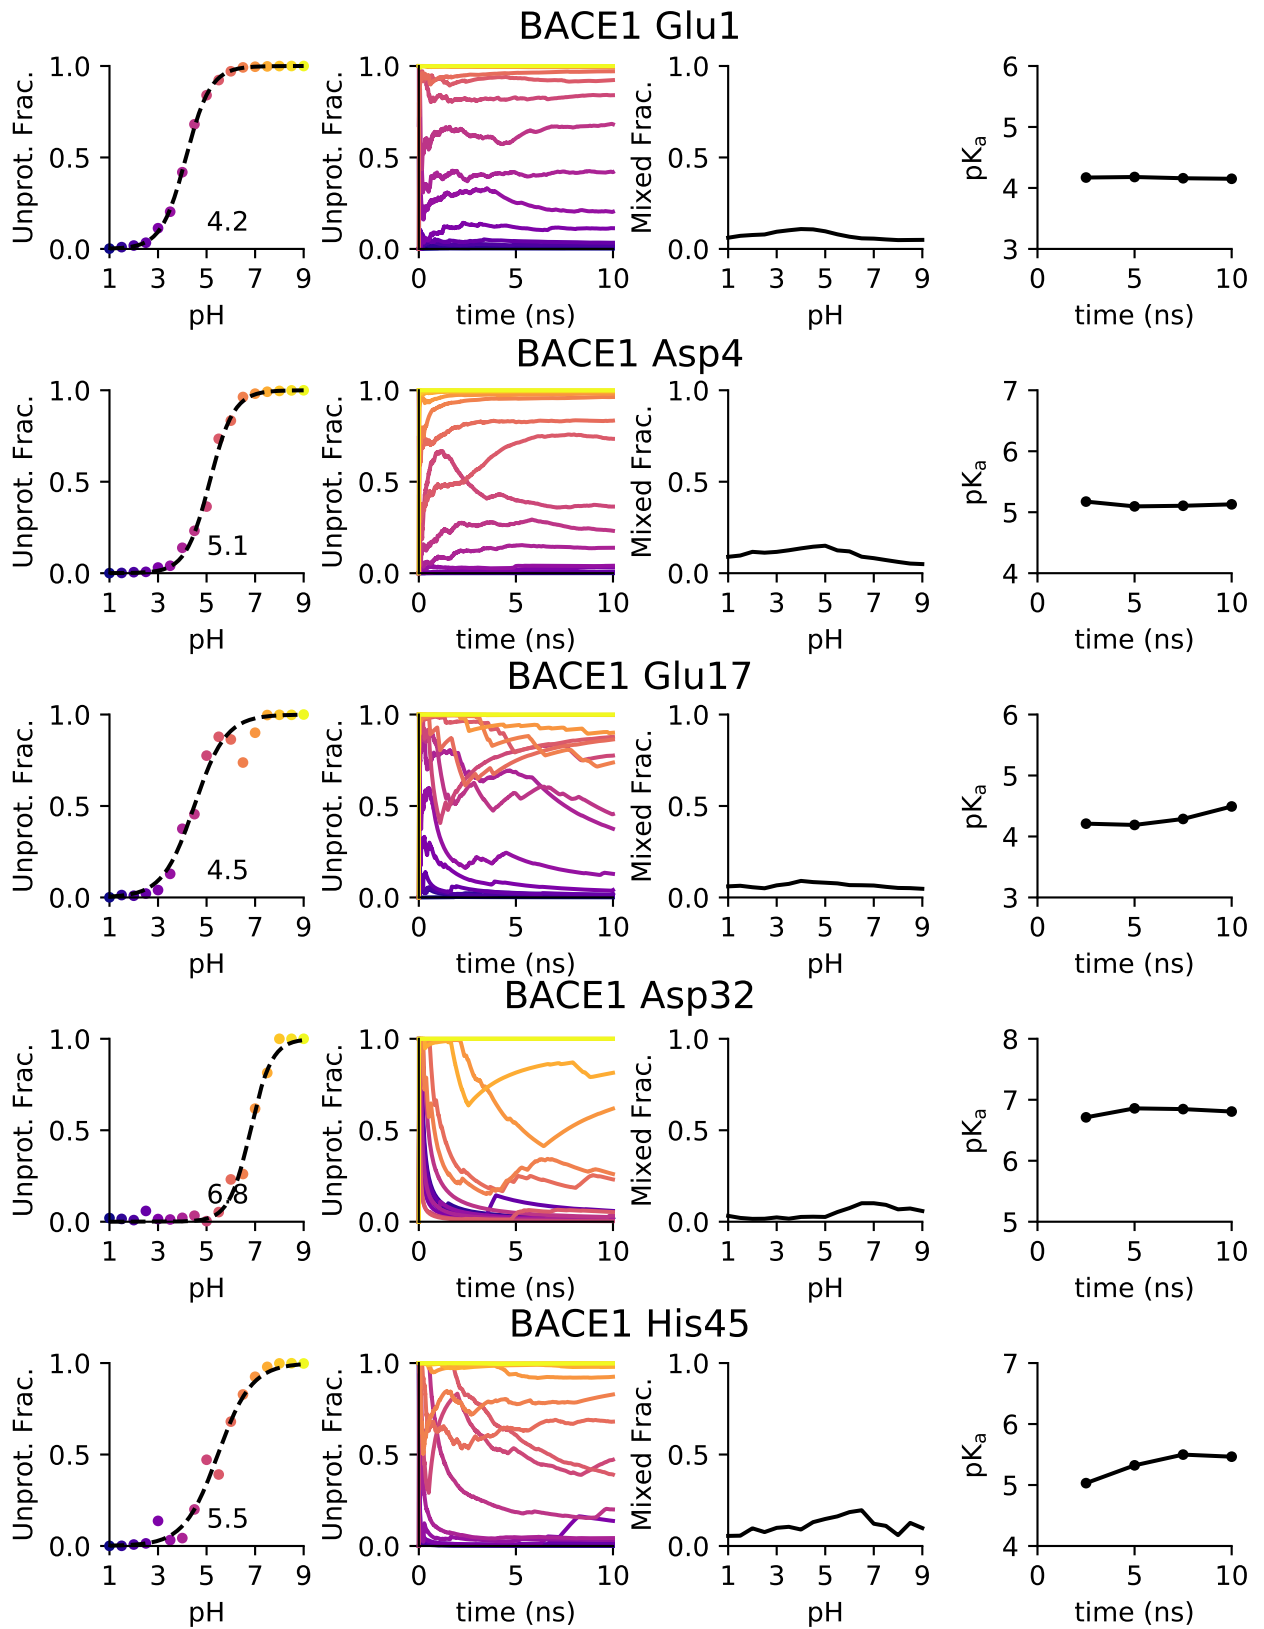

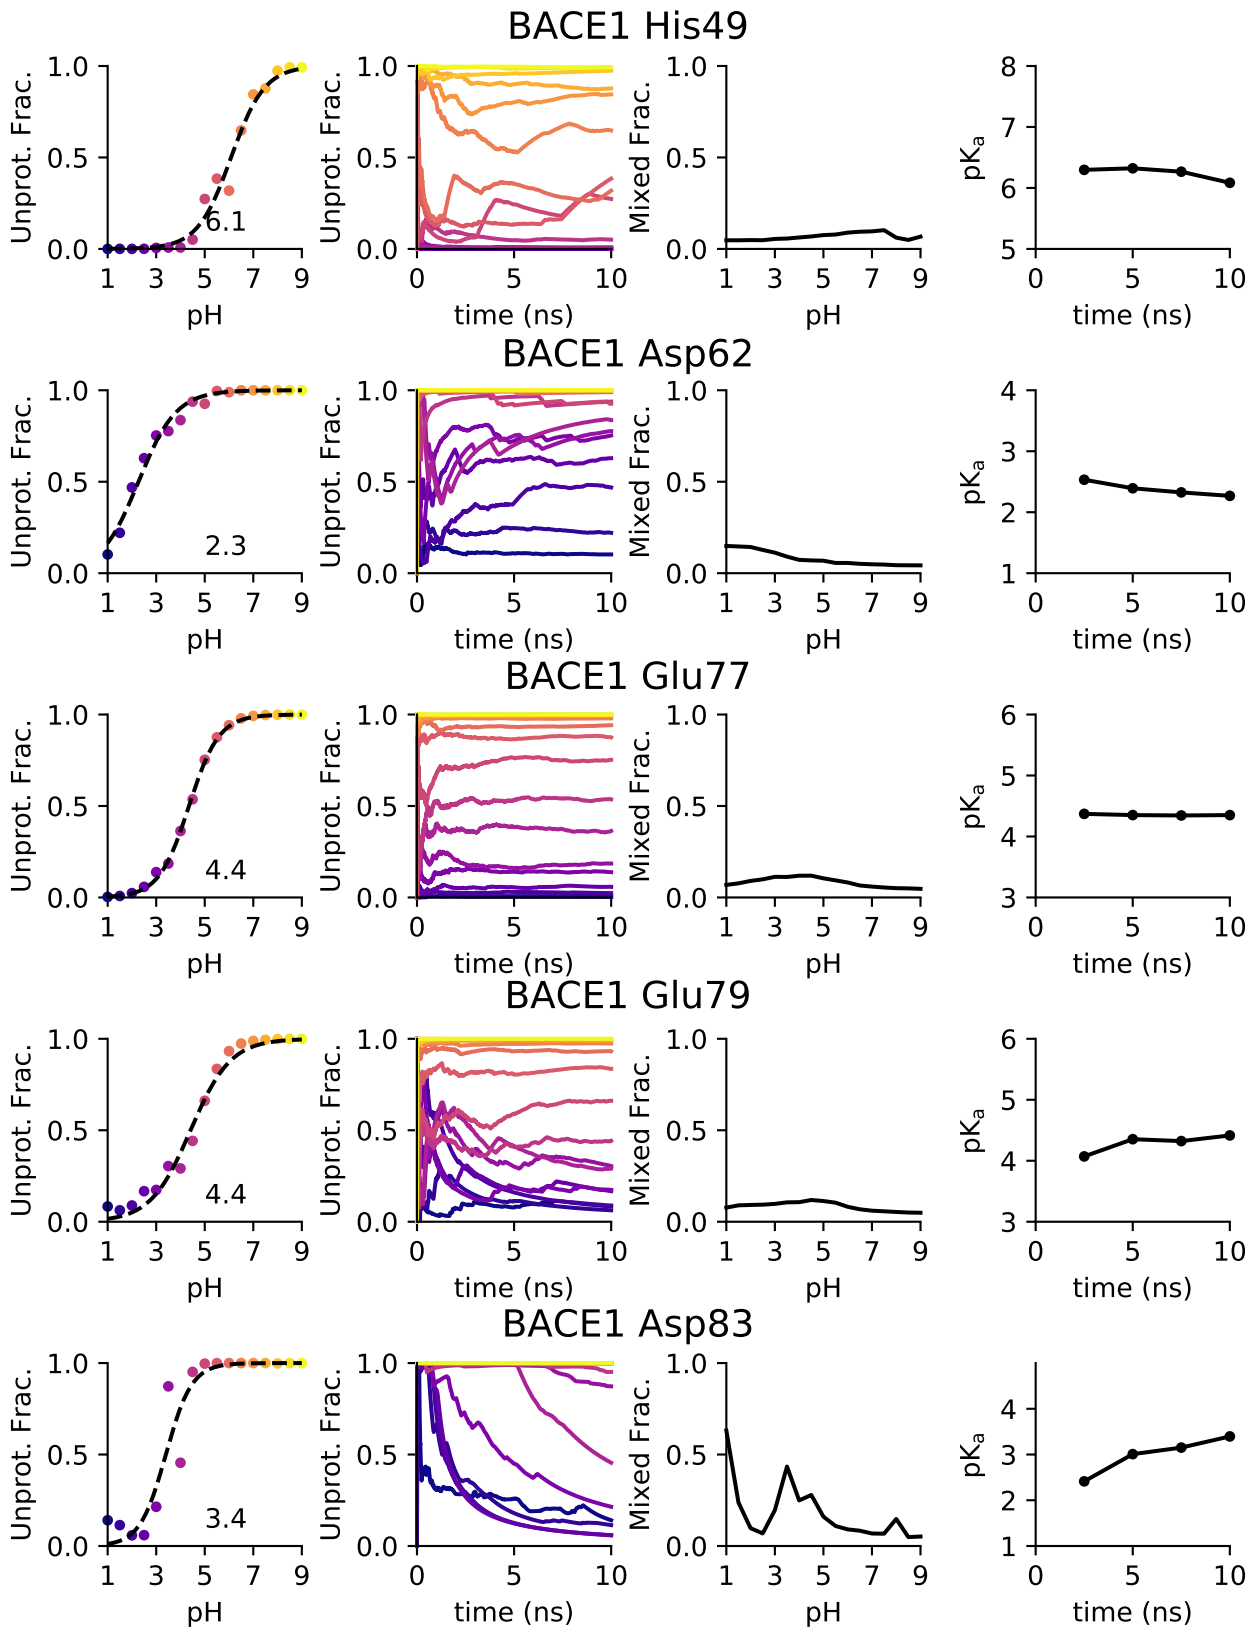



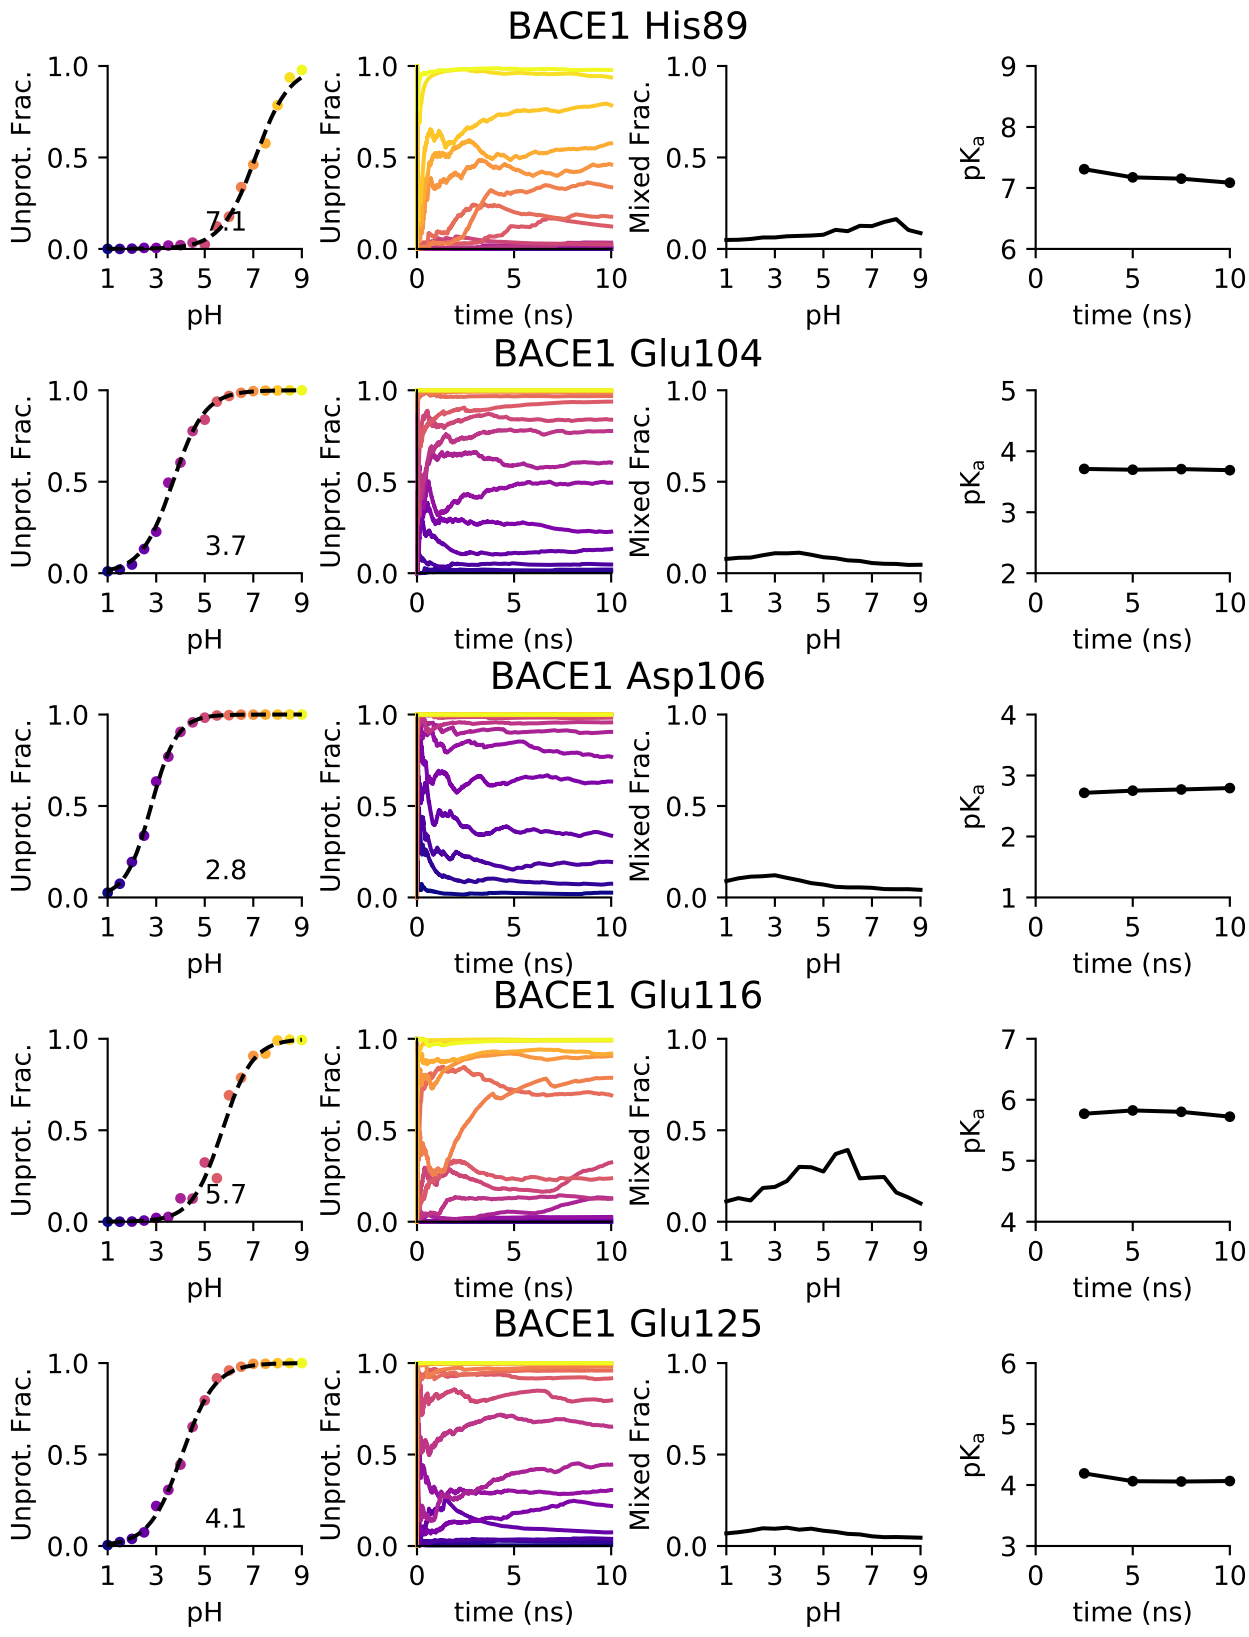

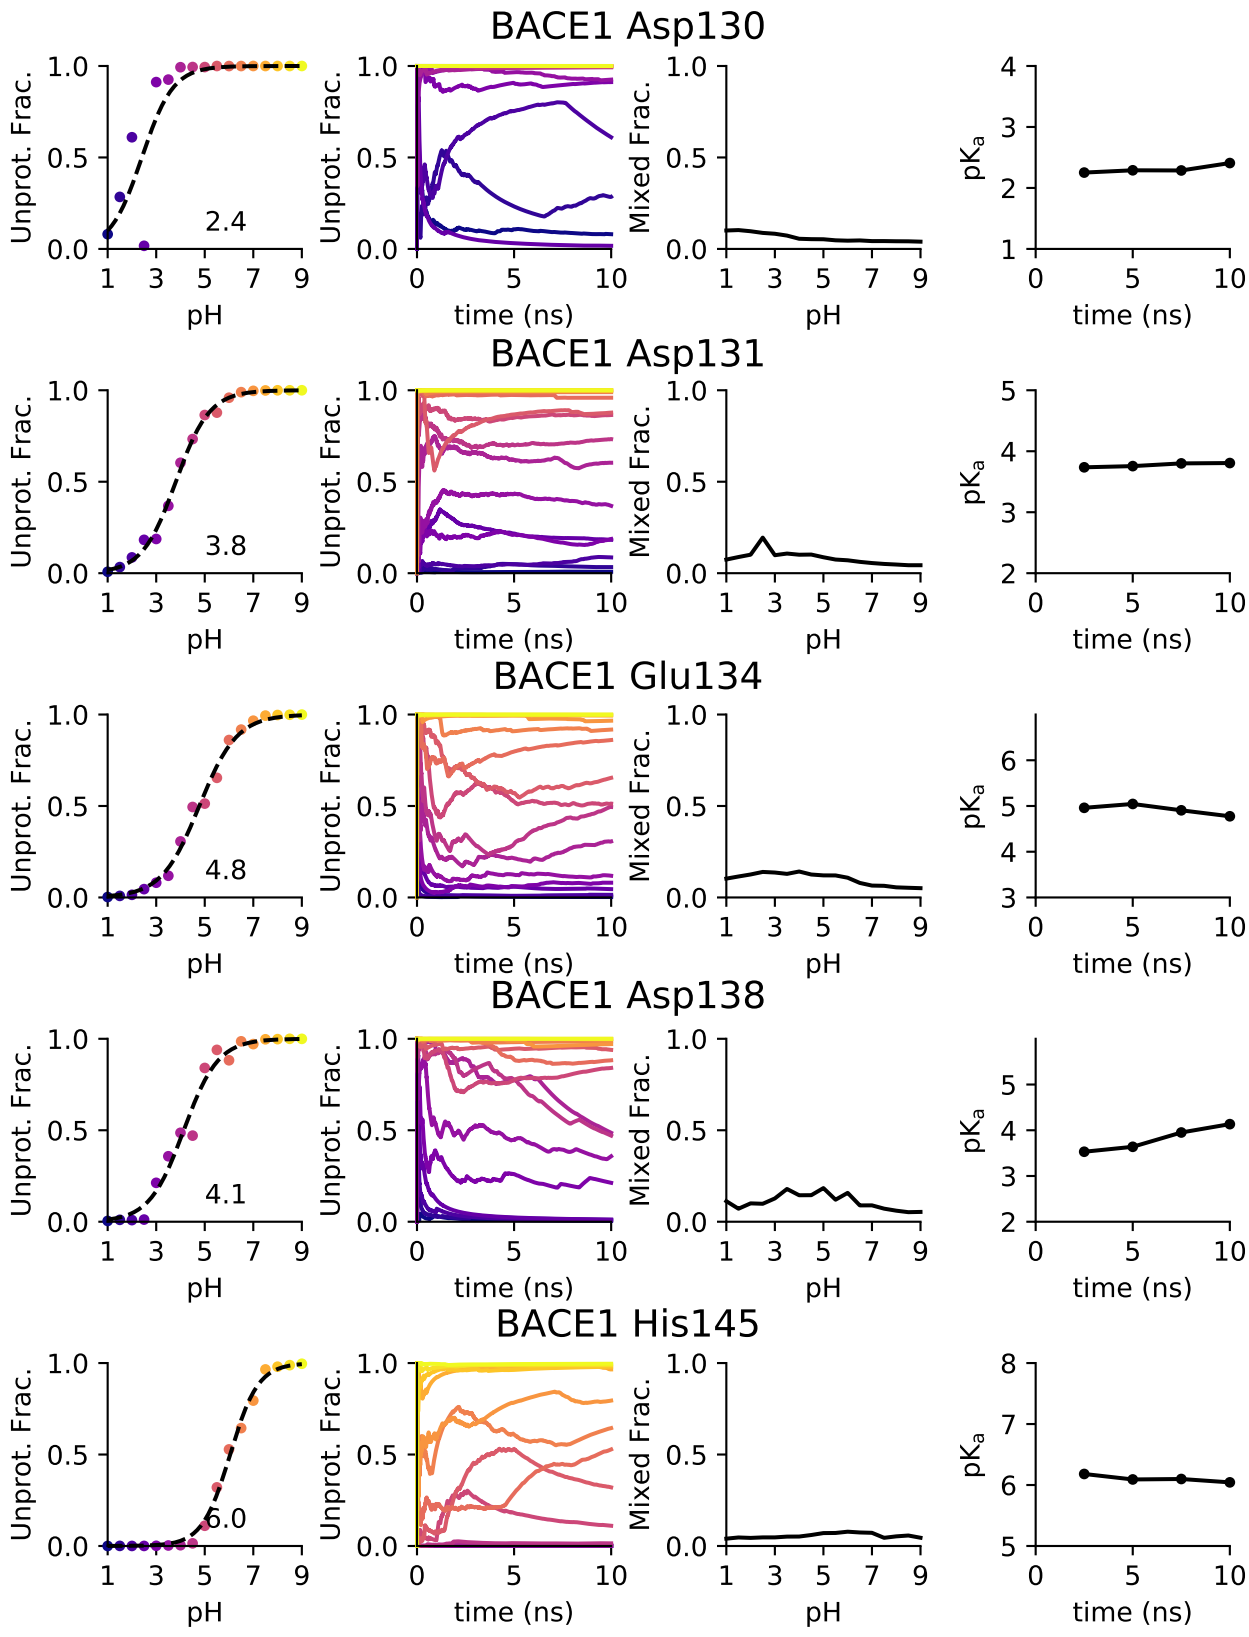

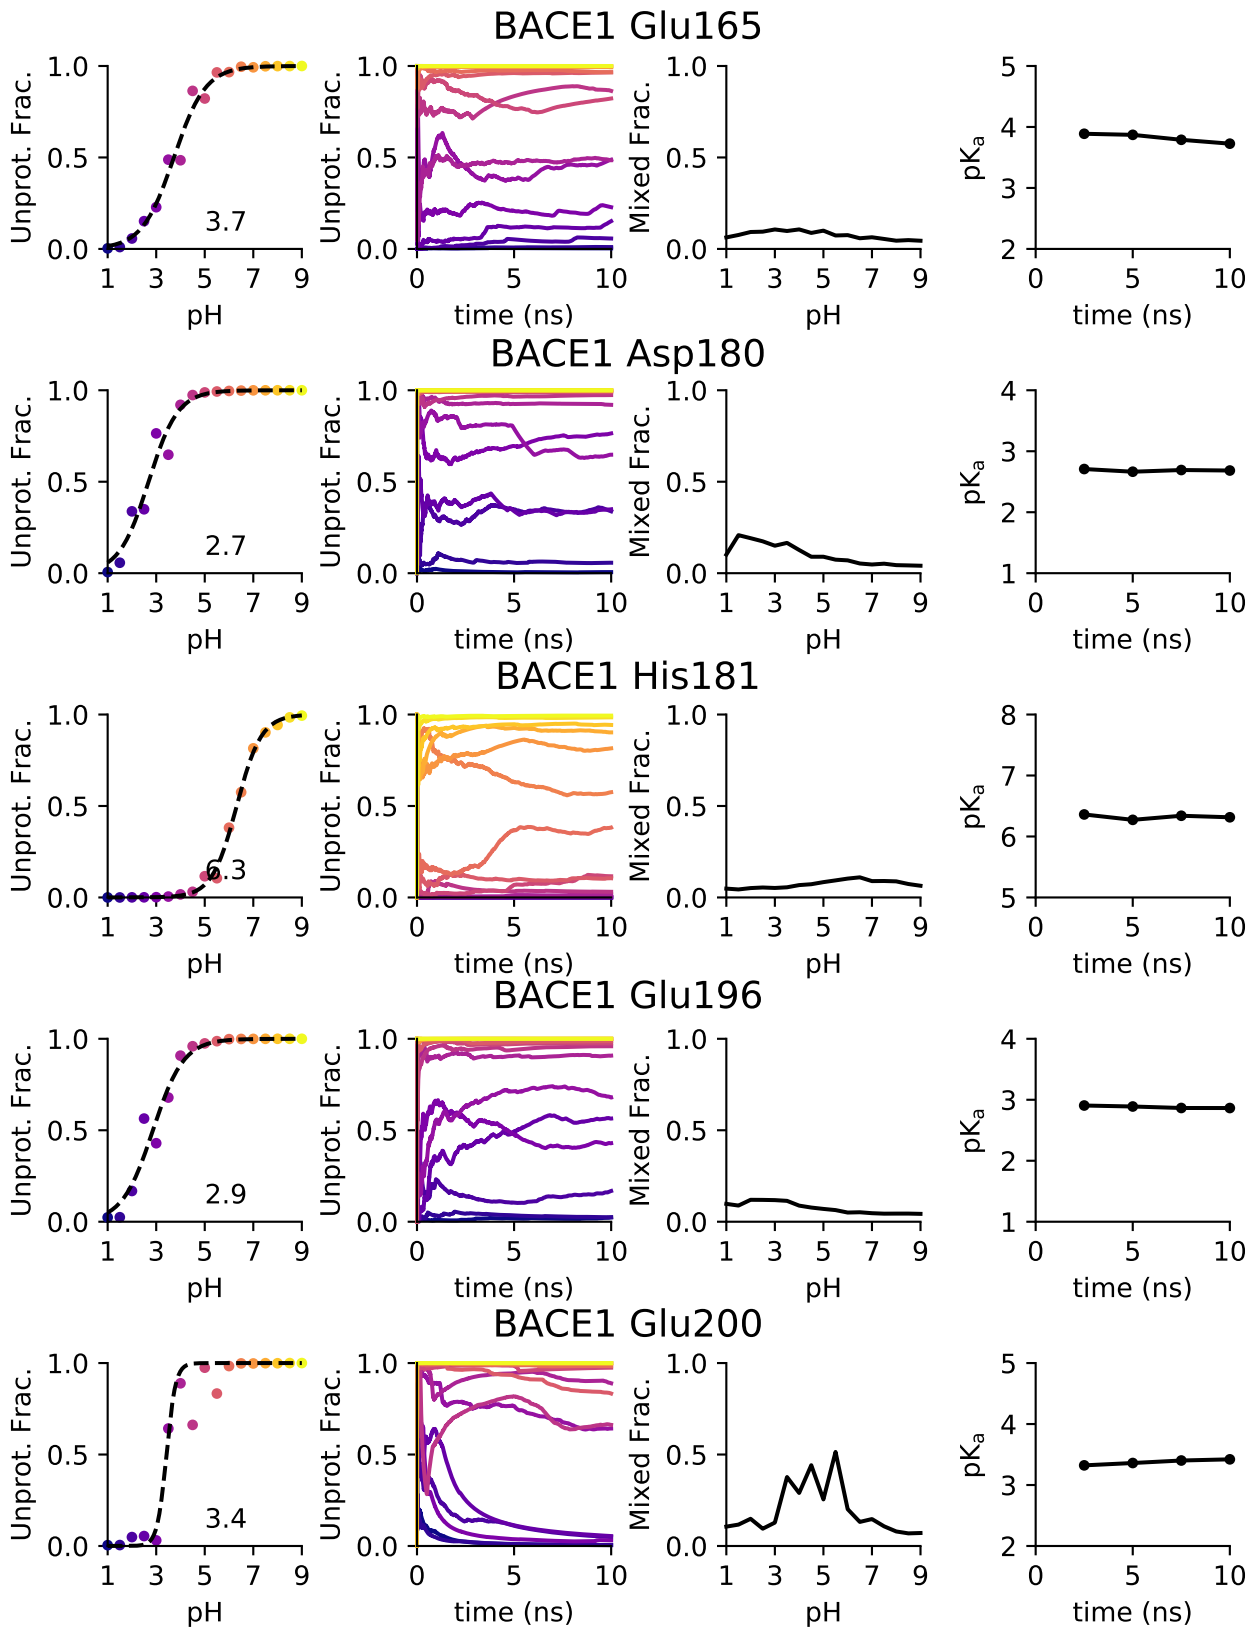

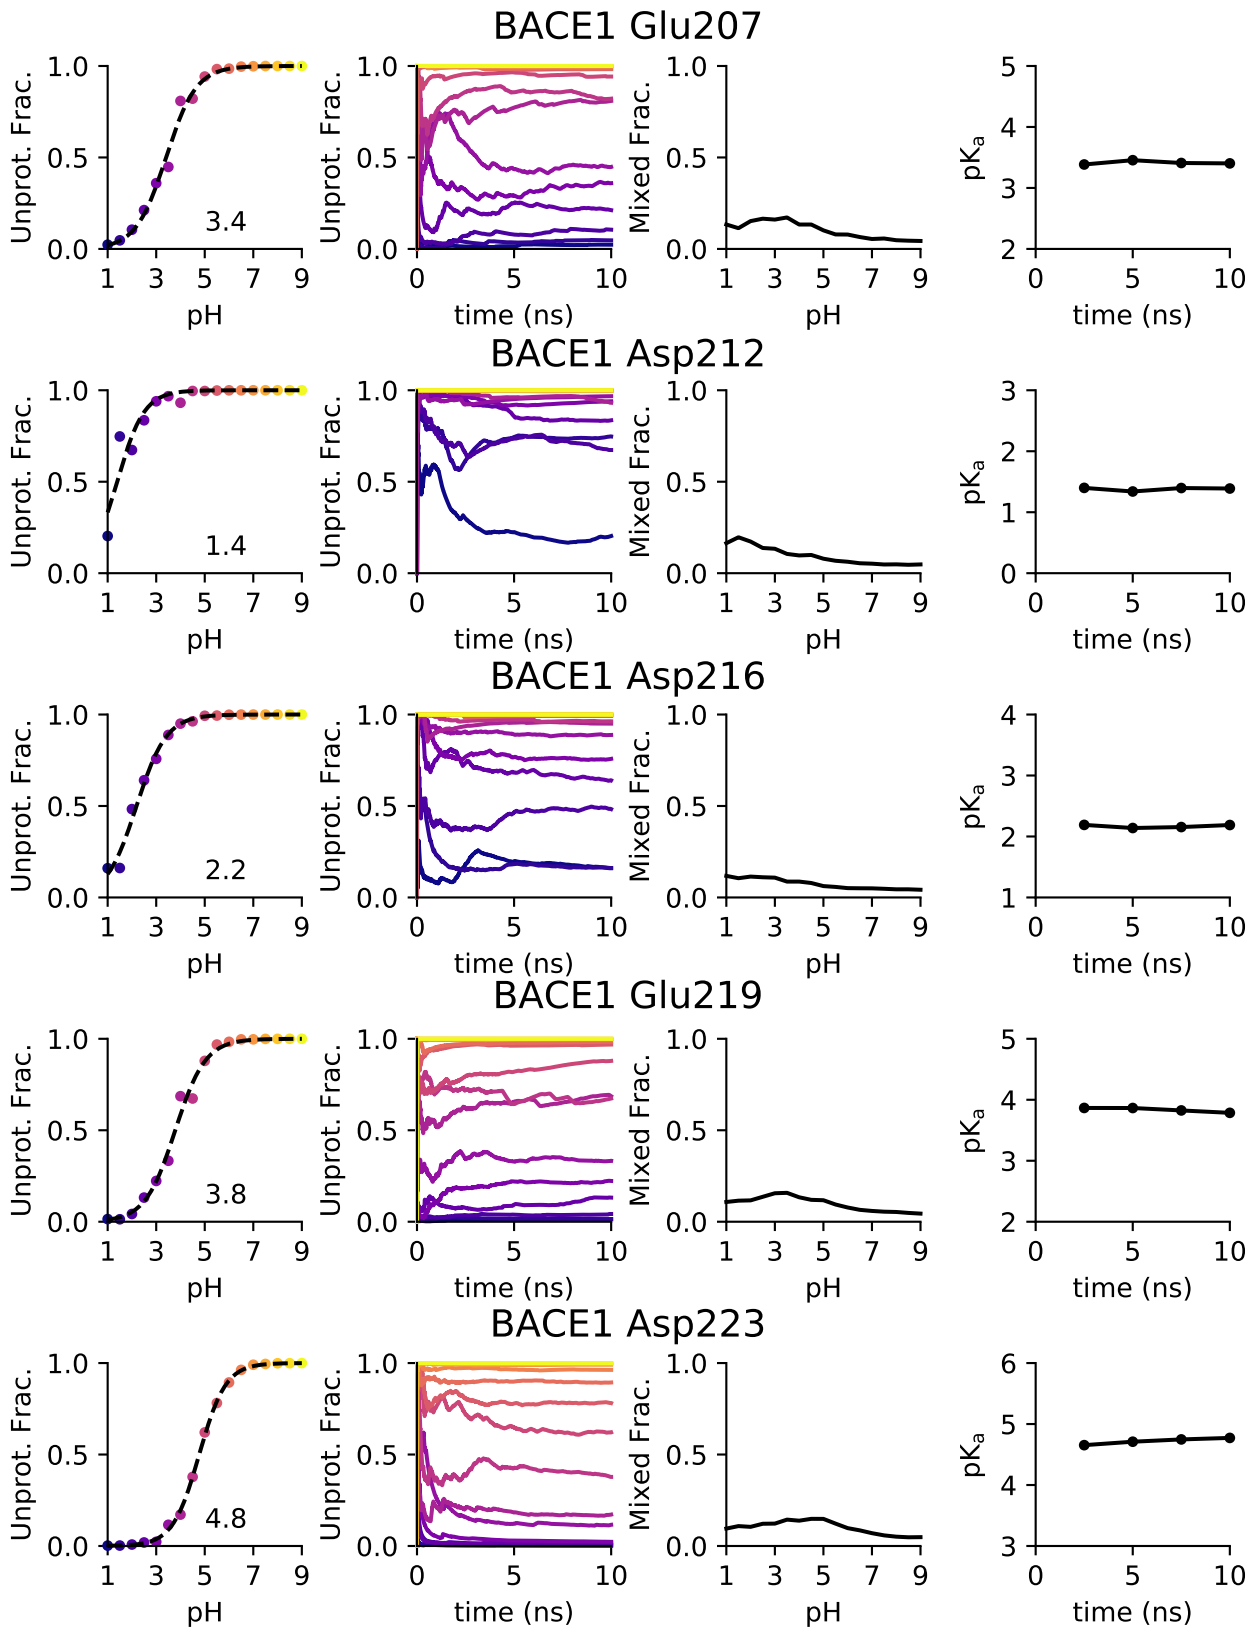

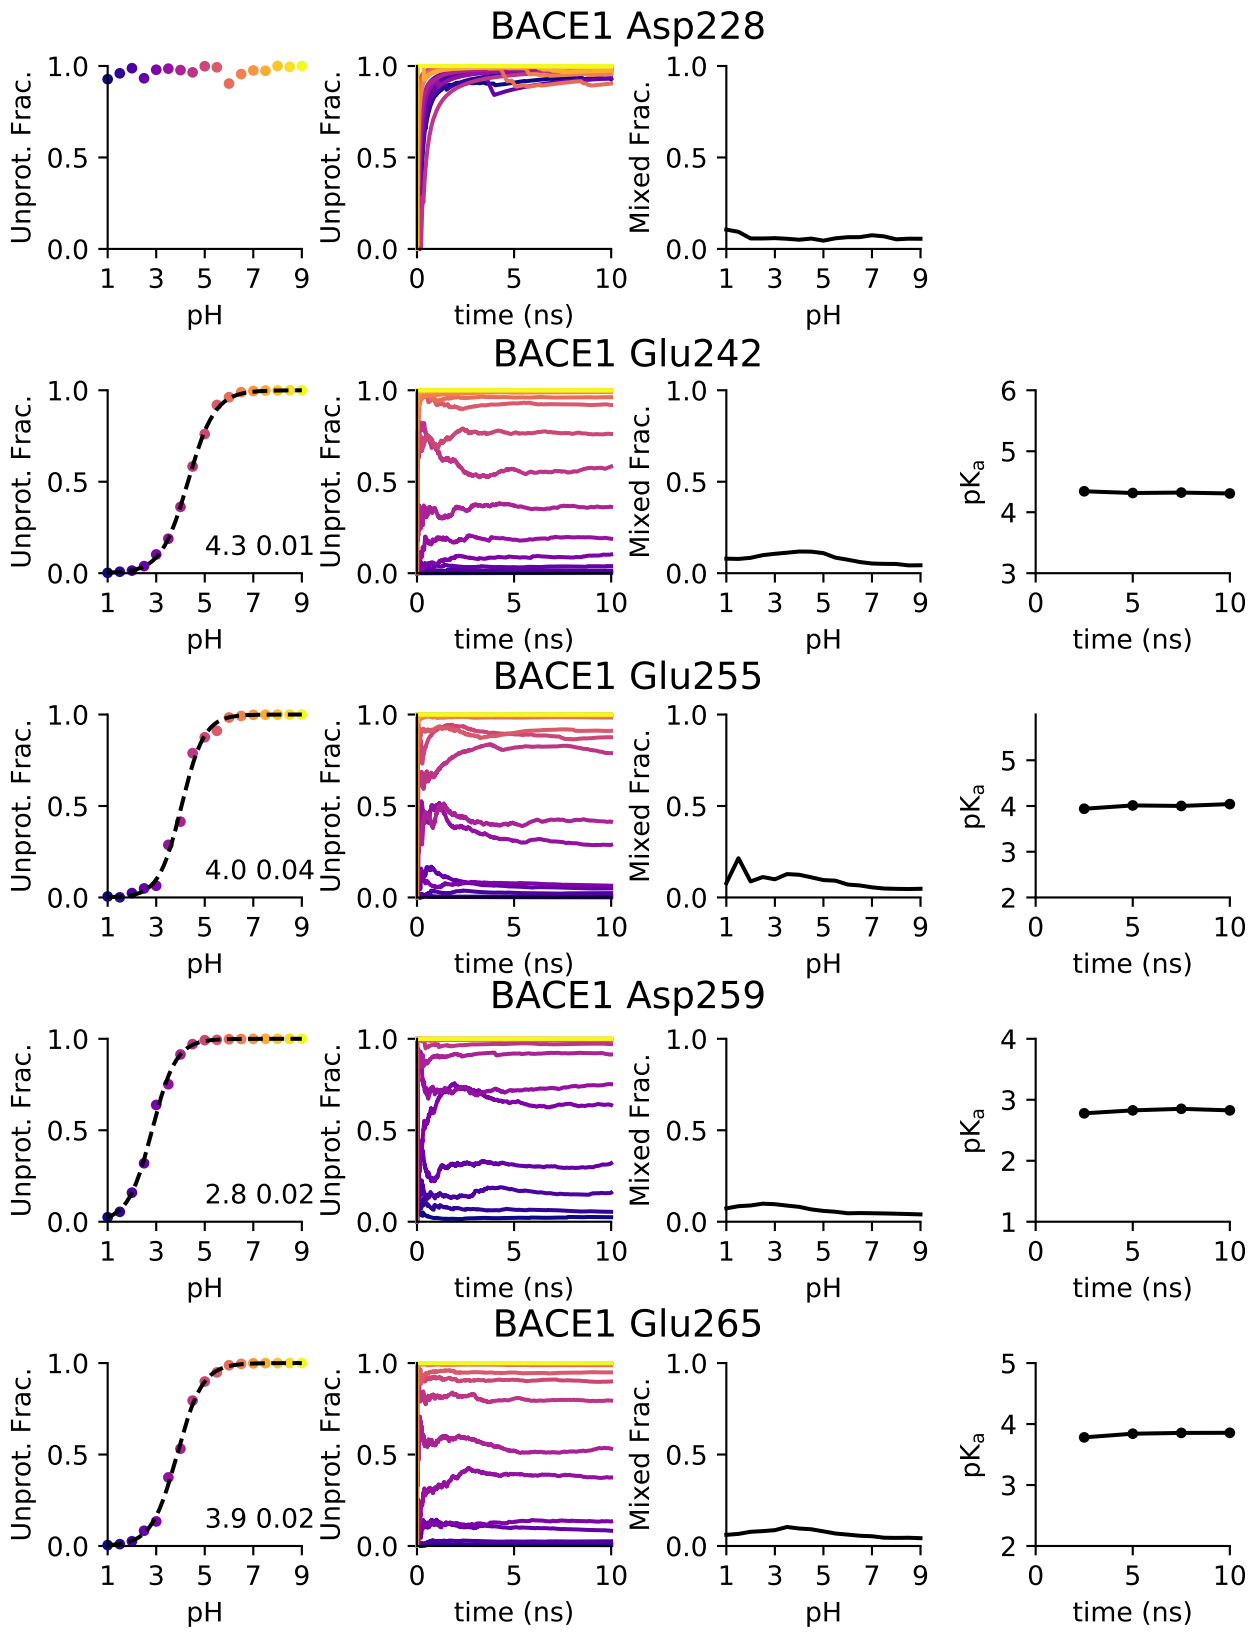

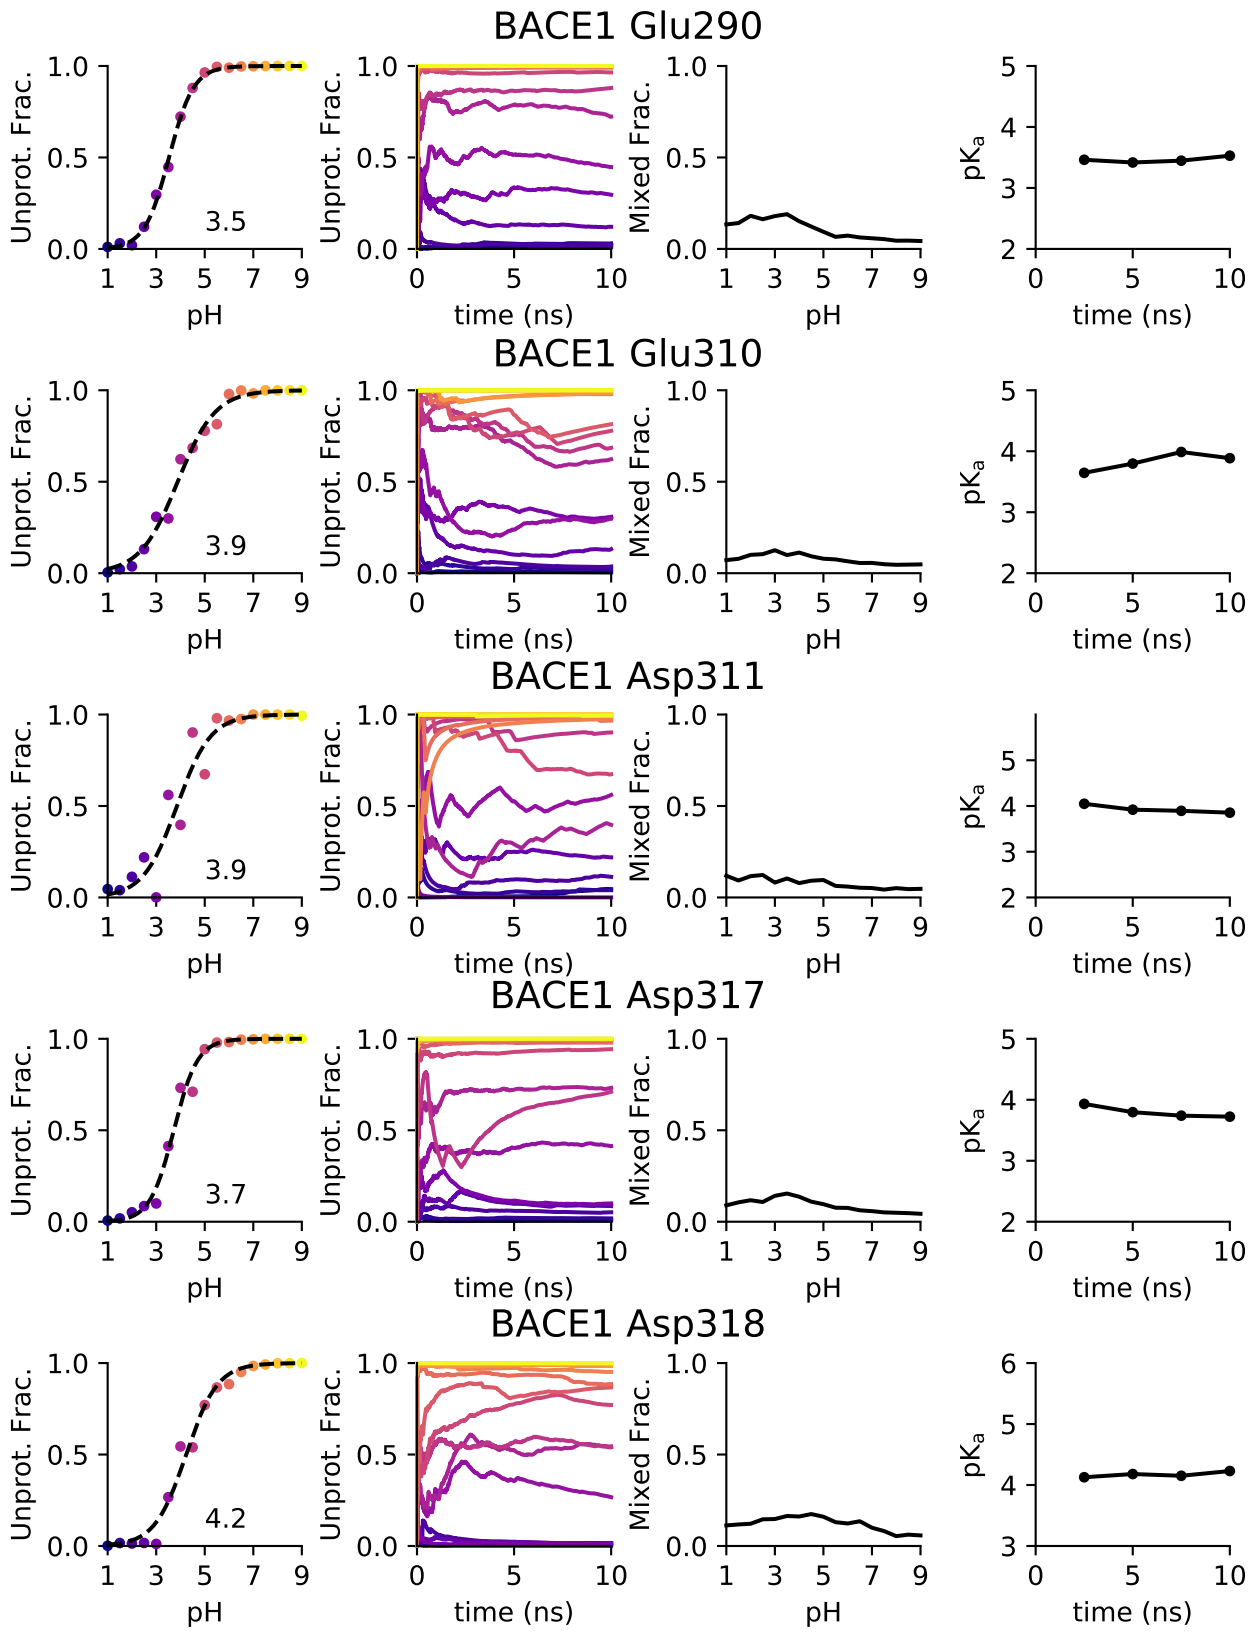

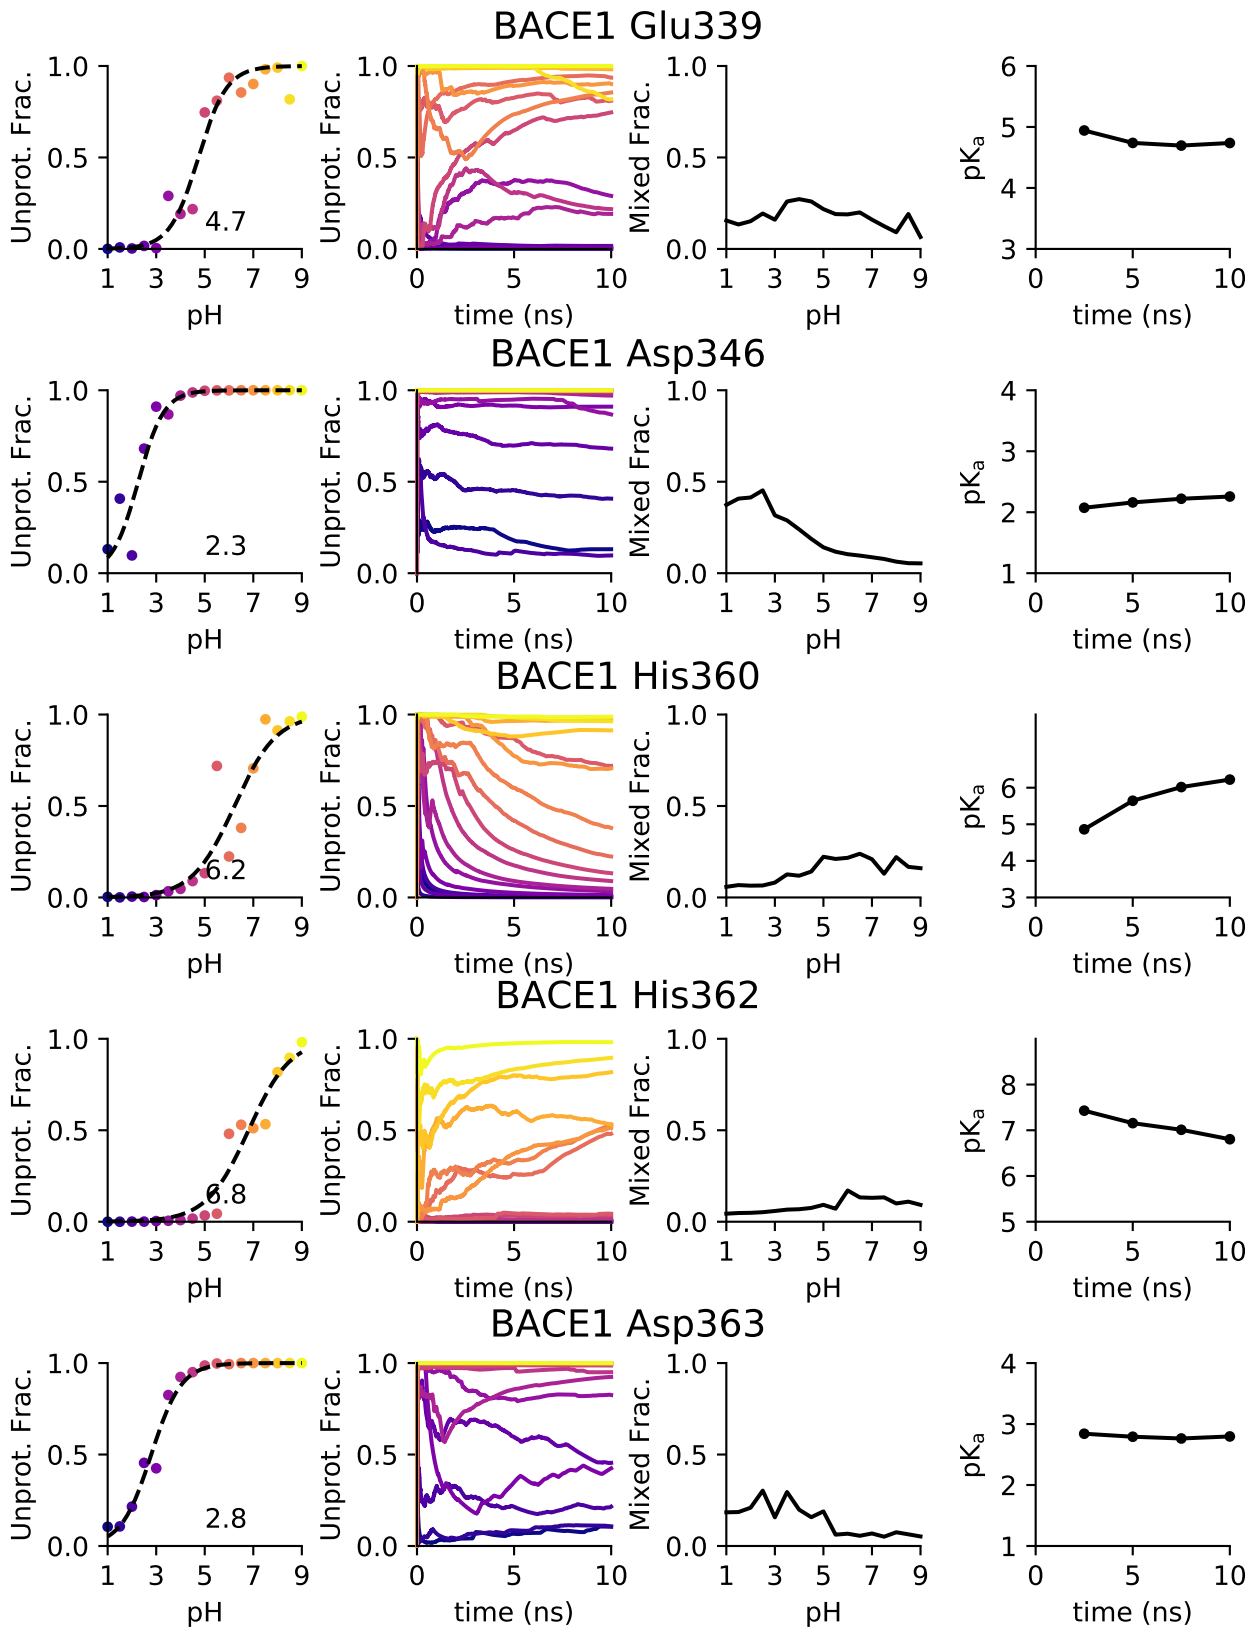

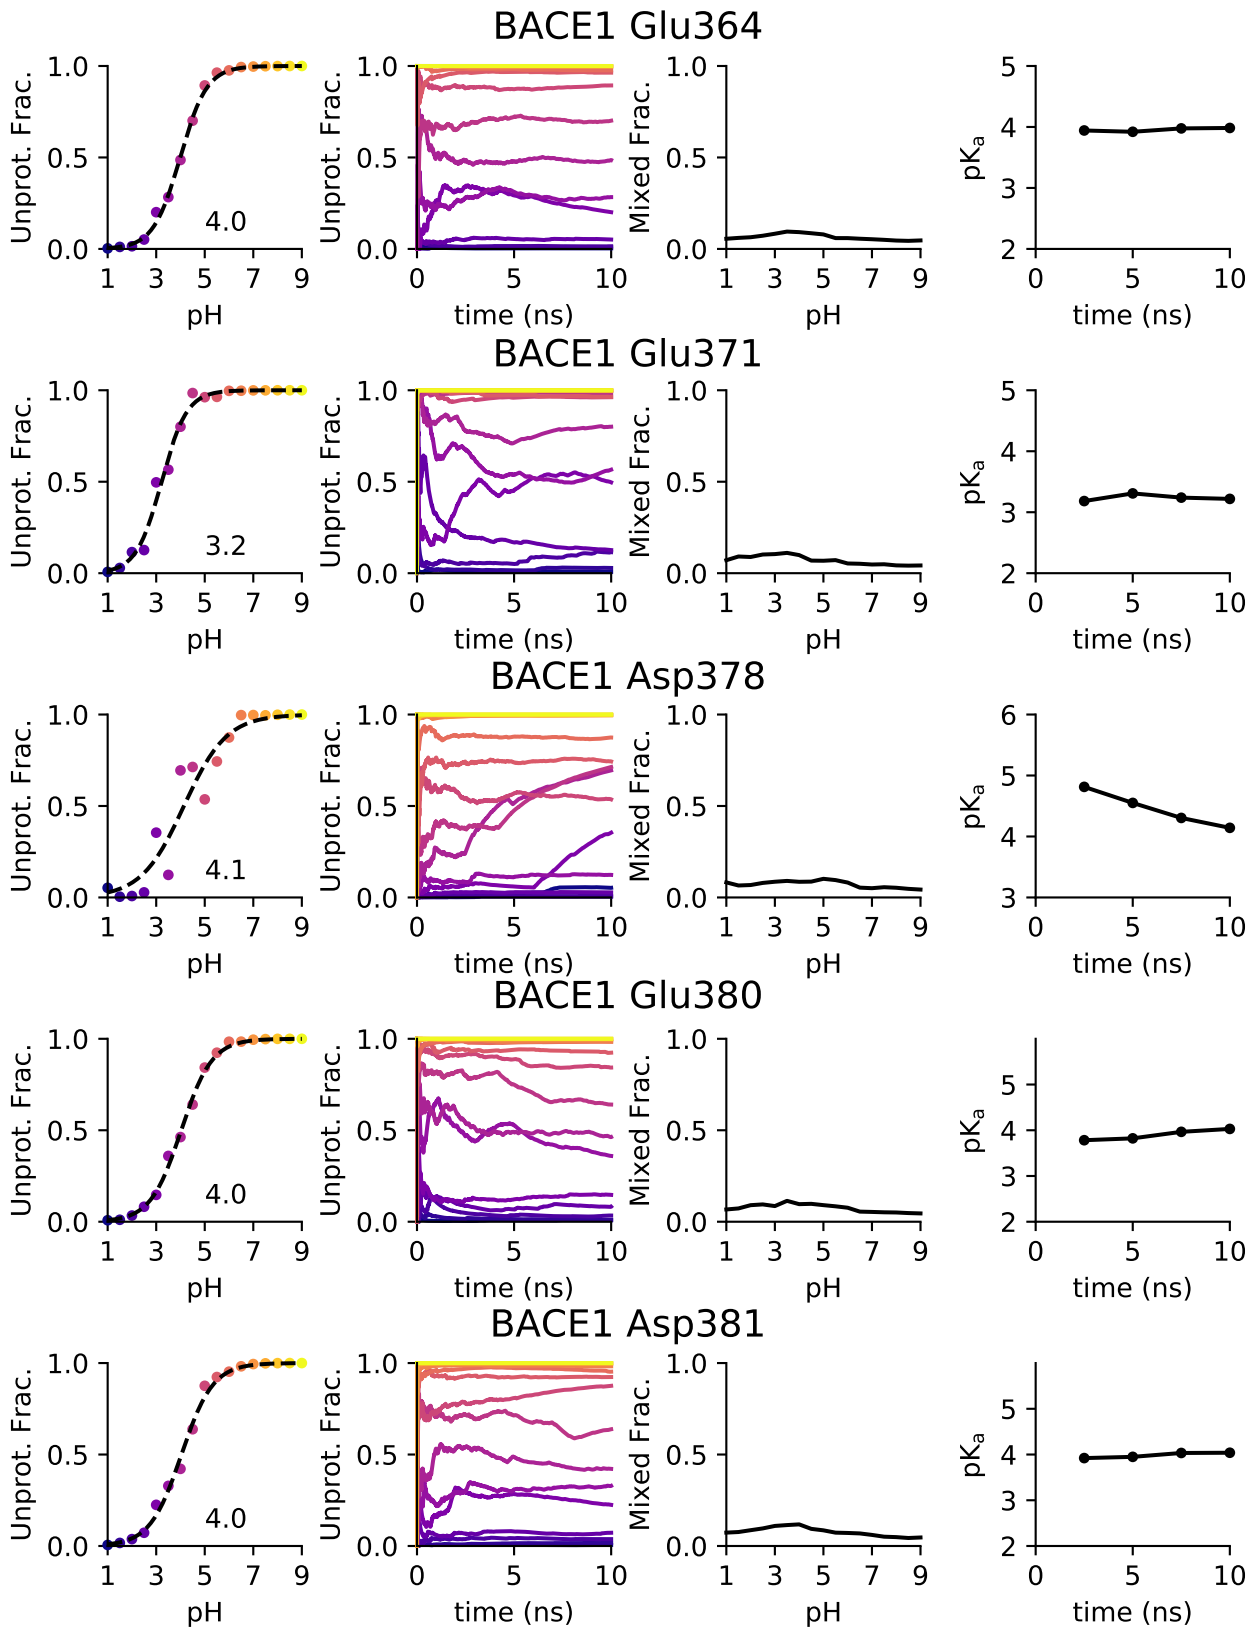



Figure S6: **Titration data, convergence of protonation-state sampling, mixed fractions, and convergence of  $pK_a$  estimates for all titratable residues in 11 proteins discussed in the main text.** The plots are arranged from left to right. **First column.** Titration data showing the unprotonated fraction at each pH and the best fit to the generalized Henderson-Hasselbalch equation (dashed black line). **Second column.** Cumulative running estimate of the unprotonated fraction as a function of time for each pH (the color of each curve corresponds to the pH in the titration data plot). **Third column.** Fraction of the time that  $\lambda$  is between the value of 0.2 and 0.8 as a function of pH. **Fourth column.** Running estimate of the  $pK_a$  as a function of time evaluated every 0.5 ns. For BACE1, results from 10-ns single pH simulation are presented.
